# Supplementary material for: Genome-Wide Identification and Analysis of the Heat-Shock Protein Gene Superfamily in Bemisia tabaci and Expression Pattern Analysis under Heat Shock
Source: MDPI journal article supplement (doi:10.3390/insects13070570), 2022-06-23
Supplement: s1 [file s1]

## **Supplementary Information**

### **Genome-wide identification and analysis of Hsp gene superfamily in *Bemisia tabaci* and expression patterns analysis under heat shock**

Hao-Yuan Zheng<sup>1</sup>, Peng-Hao Qin<sup>1</sup>, Kun Yang<sup>1</sup>, Tong-Xian Liu<sup>1</sup>, You-Jun Zhang<sup>2</sup> and Dong Chu<sup>1,\*</sup>

1 Key Lab of Integrated Crop Pest Management of Shandong Province, College of Plant Health and Medicine, Qingdao Agricultural University, Qingdao, 266109, China.

2 Department of Plant Protection, Institute of Vegetables and Flowers, Chinese Academy of Agricultural Sciences, Beijing, 100081, China.

**Running title:** Identification and analysis of *Bemisia tabaci* HSP genes

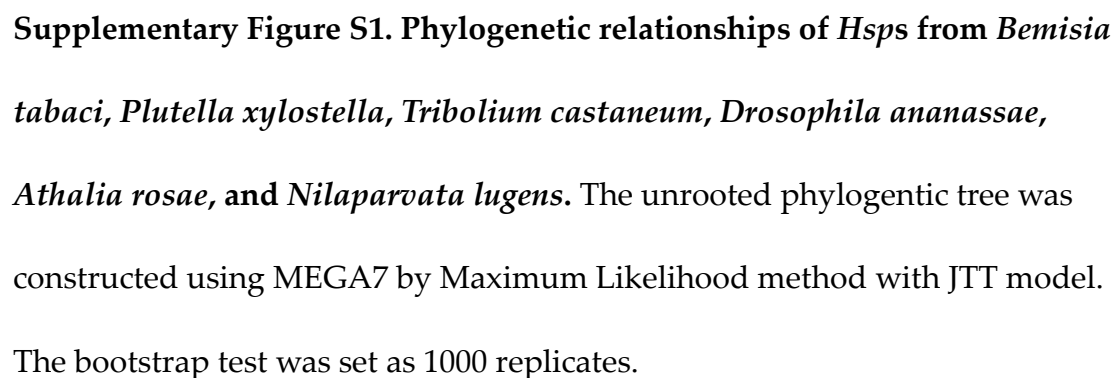

**Supplementary Figure S1. Phylogenetic relationships of *Hsps* from *Bemisia tabaci*, *Plutella xylostella*, *Tribolium castaneum*, *Drosophila ananassae*, *Athalia rosae*, and *Nilaparvata lugens*.** The unrooted phylogentic tree was constructed using MEGA7 by Maximum Likelihood method with JTT model. The bootstrap test was set as 1000 replicates.

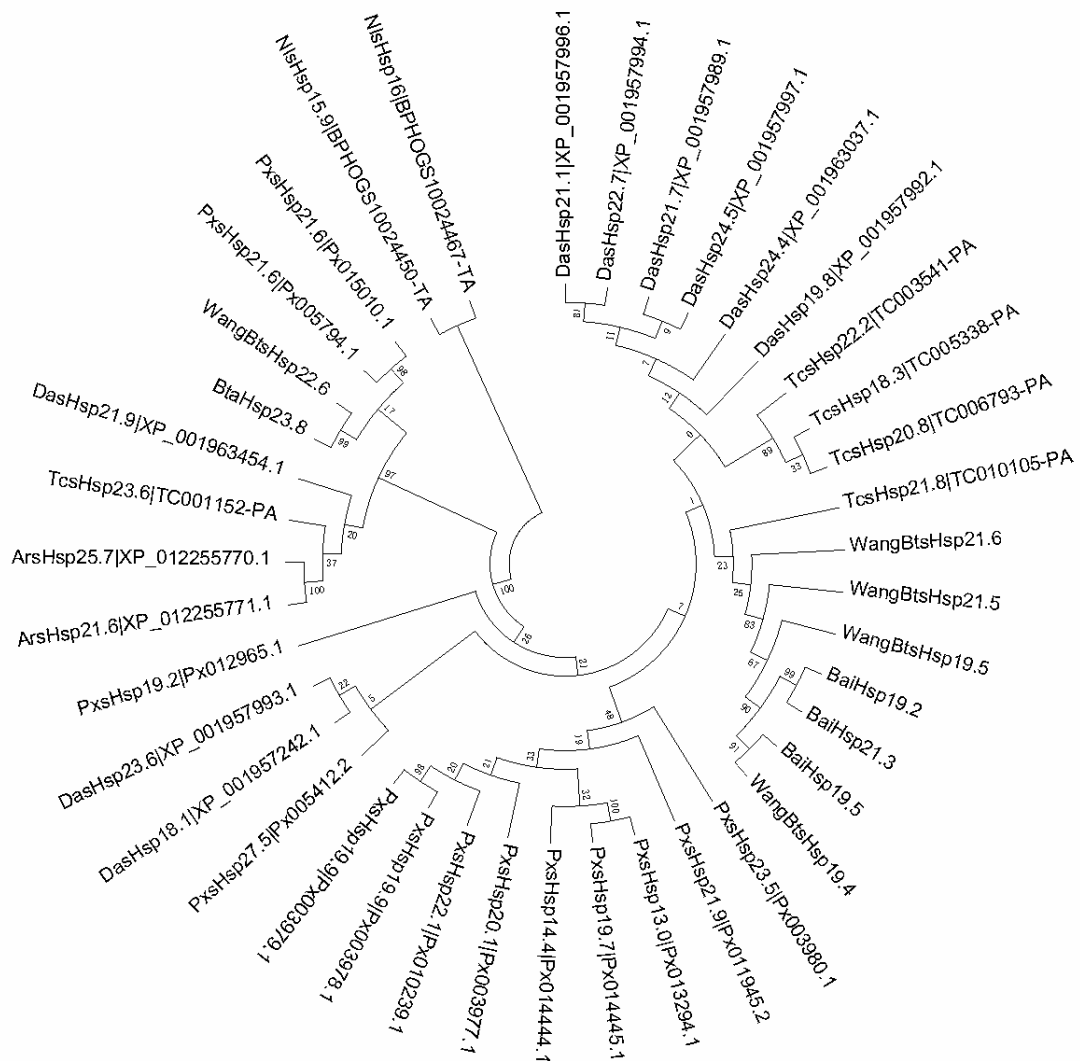

**Supplementary Figure S2. Phylogenetic relationships of sHsps from *Bemisia tabaci*, *Plutella xylostella*, *Tribolium castaneum*, *Drosophila ananassae*, *Athalia rosae*, and *Nilaparvata lugens*.** The unrooted phylogentic tree was constructed using MEGA7 by Maximum Likelihood method with JTT model. The bootstrap test was set as 1000 replicates.

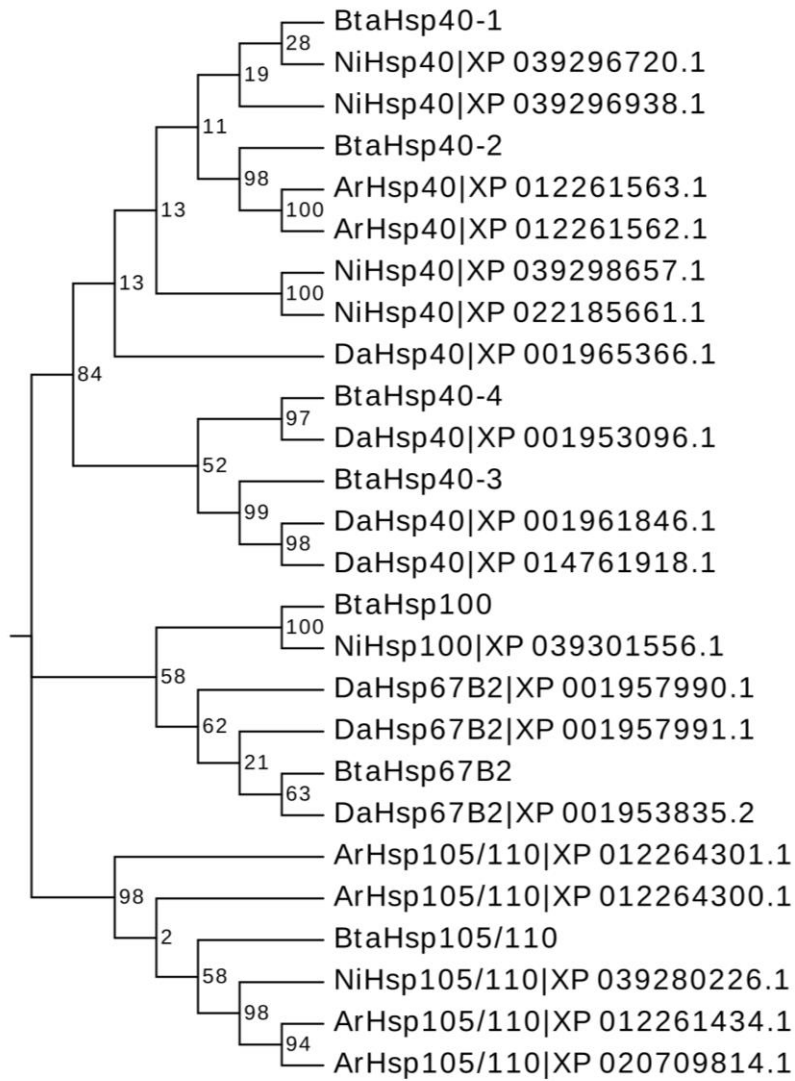

**Supplementary Figure S3. Phylogenetic relationships of *Hsp40*, *Hsp100*, *Hsp105/110*, *Hsp67B2* from *Bemisia tabaci*, *Drosophila ananassae*, *Athalia rosae*, and *Nilaparvata lugens*.** The unrooted phylogentic tree was constructed using MEGA7 by Maximum Likelihood method with JTT model. The bootstrap test was set as 1000 replicates.



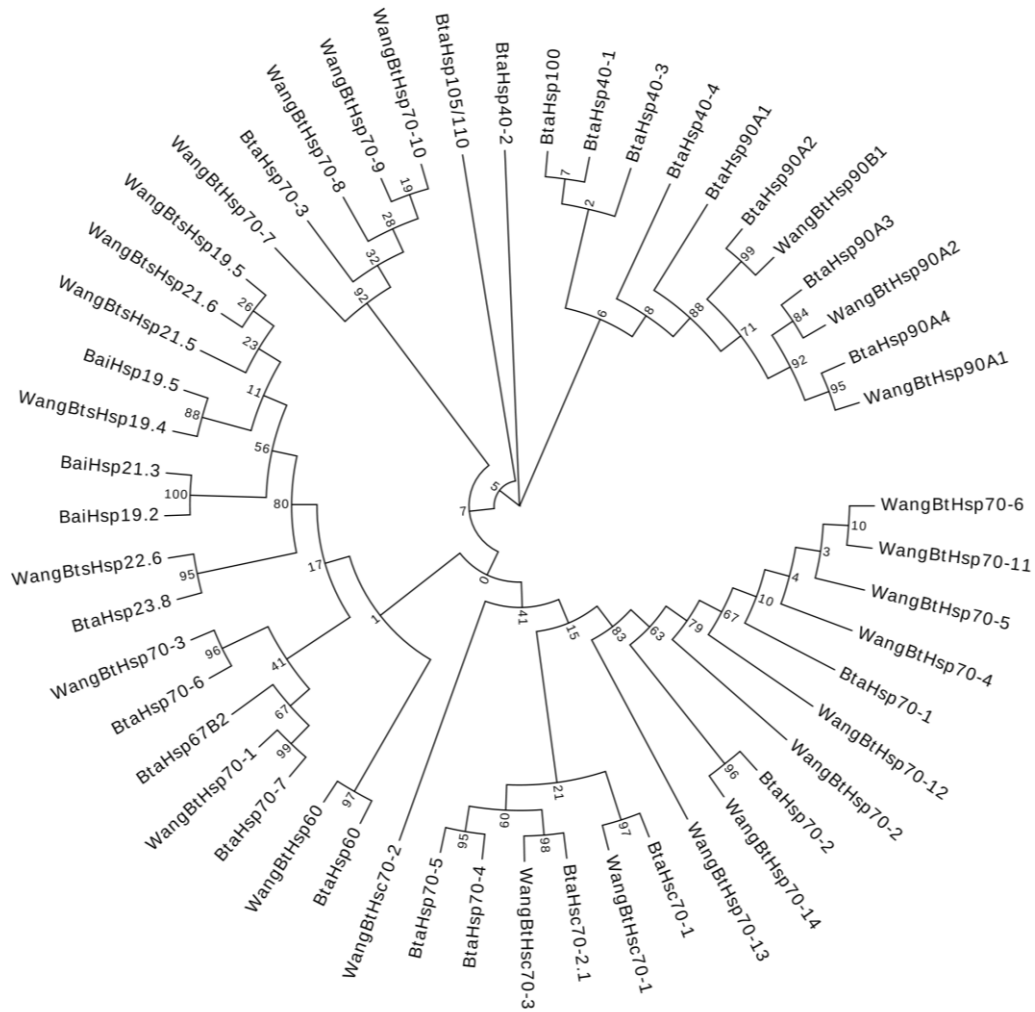

**Supplementary Figure S4. Phylogenetic relationships and gene structures analysis of the *Bemisia tabaci* HSP (BtaHSP) gene superfamily.** The unrooted phylogenetic tree was constructed using MEGA7 by Maximum Likelihood method with JTT model. The bootstrap test was set as 1000 replicates.



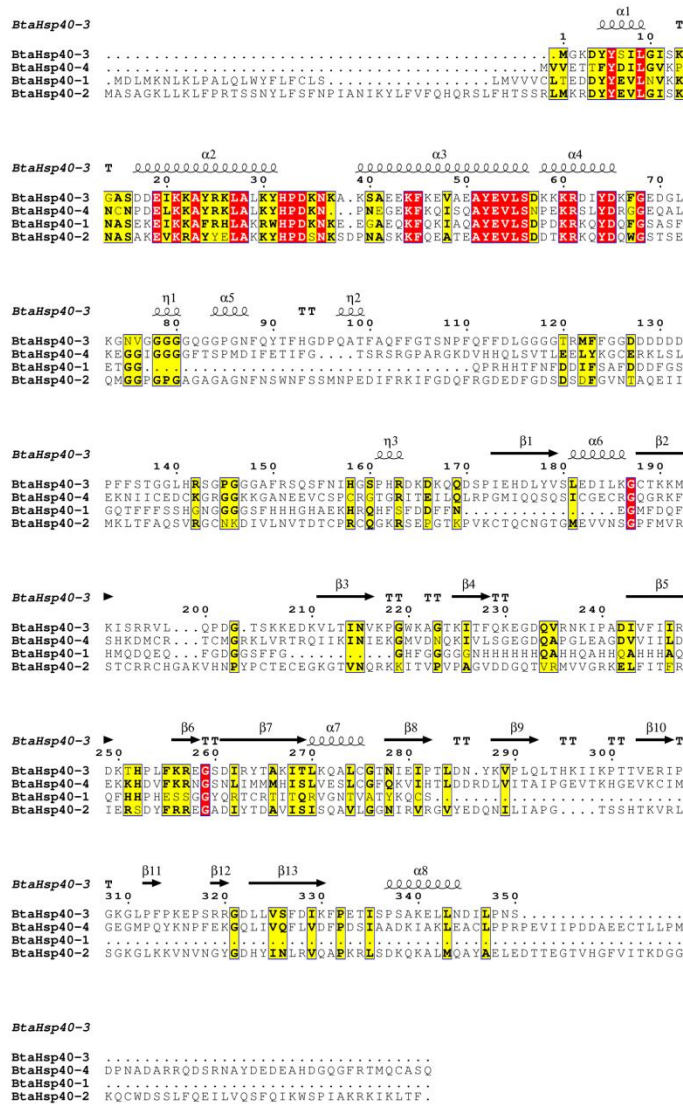

**Supplementary Figure S6. The secondary structures of *Bemisia tabaci* HSP40s.  $\alpha$ -helices and  $\beta$ -sheets were represented by yellow boxes and blue arrows shown above the sequence, respectively. The conserved domain of HSP40s were marked with a line under the sequences.**

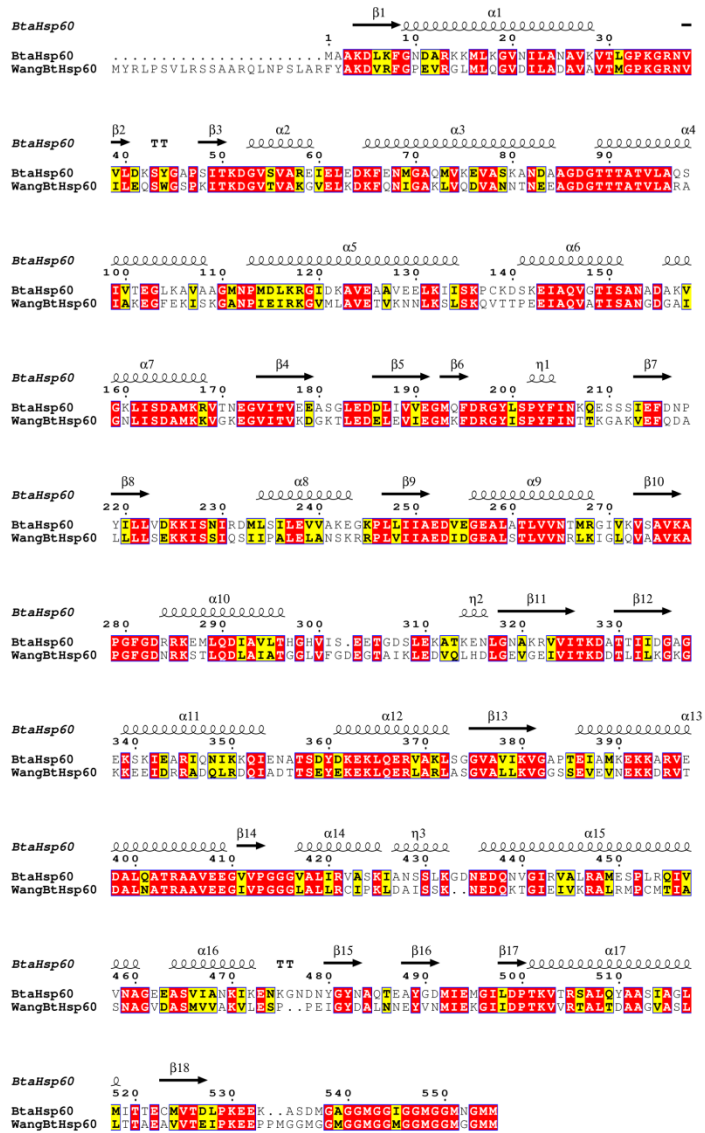

Supplementary Figure S7. The secondary structures of *Bemisia tabaci*

HSP60s.  $\alpha$ -helices and  $\beta$ -sheets were represented by yellow boxes and blue

arrows shown above the sequence, respectively. The conserved domain of

Hsp60 proteins were marked with a line under the sequences.

BtaHsp70-7

|                |   |                                                            |     |
|----------------|---|------------------------------------------------------------|-----|
| BtaHsp70-7     | 1 | MAAMS                                                      | VI  |
| WangBtHsp70-1  | 1 | MAAMS                                                      | VI  |
| BtaHsc70-2     | 1 | MAAMS                                                      | VI  |
| WangBtHsc70-3  | 1 | MLYVARVVGKTLHCCLFNPSYITTSNFISIYLSKTPVIFNRIYEFQRRFRKSEQVKGT | VI  |
| BtaHsp70-4     | 1 | MTKRI                                                      | II  |
| BtaHsp70-5     | 1 | MIRRI                                                      | I   |
| WangBtHsp70-4  | 1 | MAKAP                                                      | AV  |
| WangBtHsp70-12 | 1 | MVKAP                                                      | AI  |
| BtaHsp70-1     | 1 | MVKAP                                                      | AI  |
| WangBtHsp70-5  | 1 | MPGKT                                                      | PAI |
| WangBtHsp70-6  | 1 | MPGKT                                                      | PAI |
| WangBtHsp70-2  | 1 | MPGKT                                                      | PAI |
| WangBtHsp70-11 | 1 | MPGKT                                                      | PAI |
| WangBtHsp70-13 | 1 | MKT                                                        | PAI |
| BtaHsp70-2     | 1 | MGKQV                                                      | PAV |
| WangBtHsp70-14 | 1 | MAKAP                                                      | AI  |
| WangBtHsc70-2  | 1 | MEKRA                                                      | I   |
| BtaHsp70-3     | 1 | MEKRA                                                      | I   |
| WangBtHsp70-9  | 1 | MEKRA                                                      | I   |
| WangBtHsp70-10 | 1 | MEKRA                                                      | I   |
| WangBtHsp70-8  | 1 | MEKRA                                                      | I   |
| WangBtHsp70-7  | 1 | MRLLFLSGAFCLLACVAFAKEKKDKEDFGT                             | VV  |
| BtaHsc70-1     | 1 | MRLLFLSGAFCLLACVAFAKEKKDKEDFGT                             | VV  |
| WangBtHsc70-1  | 1 | MRLLFLSGAFCLLACVAFAKEKKDKEDFGT                             | VV  |
| BtaHsp70-6     | 1 | MSRFT                                                      | TVF |
| WangBtHsp70-3  | 1 | MSRFT                                                      | TVF |

|                |          |           |         |         |        |         |         |       |       |
|----------------|----------|-----------|---------|---------|--------|---------|---------|-------|-------|
| BtaHsp70-7     | β1       | β2        | β3      | TT      | β4     | β5      | β6      | α1    | η1    |
| BtaHsp70-7     | 10       | 20        | 30      | 40      | 50     | 60      | 70      | 80    | 90    |
| BtaHsp70-7     | GIDFGNBS | SCVAVAR   | AGGIEIT | ANDYSLR | ATPS   | CVAFSEK | TRILGVA | AAKN  | QLV   |
| WangBtHsp70-1  | GIDFGNBS | SCVAVAR   | AGGIEIT | ANDYSLR | ATPS   | CVAFSEK | TRILGVA | AAKN  | QLV   |
| BtaHsc70-2     | .....    | .....     | ME      | GKIPK   | VIEN   | SEGSRT  | TPSV    | VAFSK | DGE   |
| WangBtHsc70-3  | GIDLGT   | TNSCVAVME | GKIPK   | VIEN    | SEGSRT | TPSV    | VAFSK   | DGE   | ERIVG |
| BtaHsp70-4     | GIDLGT   | TNSCVAVME | GKIPK   | VIEN    | SEGSRT | TPSV    | VAFSK   | DGE   | ERIVG |
| BtaHsp70-5     | GIDLGT   | TNSCVAVME | GKIPK   | VIEN    | SEGSRT | TPSV    | VAFSK   | DGE   | ERIVG |
| WangBtHsp70-4  | GIDLGT   | TNSCVAVME | GKIPK   | VIEN    | SEGSRT | TPSV    | VAFSK   | DGE   | ERIVG |
| WangBtHsp70-12 | GIDLGT   | TNSCVAVME | GKIPK   | VIEN    | SEGSRT | TPSV    | VAFSK   | DGE   | ERIVG |
| BtaHsp70-1     | GIDLGT   | TNSCVAVME | GKIPK   | VIEN    | SEGSRT | TPSV    | VAFSK   | DGE   | ERIVG |
| WangBtHsp70-5  | GIDLGT   | TNSCVAVME | GKIPK   | VIEN    | SEGSRT | TPSV    | VAFSK   | DGE   | ERIVG |
| WangBtHsp70-6  | GIDLGT   | TNSCVAVME | GKIPK   | VIEN    | SEGSRT | TPSV    | VAFSK   | DGE   | ERIVG |
| WangBtHsp70-2  | GIDLGT   | TNSCVAVME | GKIPK   | VIEN    | SEGSRT | TPSV    | VAFSK   | DGE   | ERIVG |
| WangBtHsp70-11 | GIDLGT   | TNSCVAVME | GKIPK   | VIEN    | SEGSRT | TPSV    | VAFSK   | DGE   | ERIVG |
| WangBtHsp70-13 | GIDLGT   | TNSCVAVME | GKIPK   | VIEN    | SEGSRT | TPSV    | VAFSK   | DGE   | ERIVG |
| BtaHsp70-2     | GIDLGT   | TNSCVAVME | GKIPK   | VIEN    | SEGSRT | TPSV    | VAFSK   | DGE   | ERIVG |
| WangBtHsp70-14 | GIDLGT   | TNSCVAVME | GKIPK   | VIEN    | SEGSRT | TPSV    | VAFSK   | DGE   | ERIVG |
| WangBtHsc70-2  | GIDLGT   | TNSCVAVME | GKIPK   | VIEN    | SEGSRT | TPSV    | VAFSK   | DGE   | ERIVG |
| BtaHsp70-3     | GIDLGT   | TNSCVAVME | GKIPK   | VIEN    | SEGSRT | TPSV    | VAFSK   | DGE   | ERIVG |
| WangBtHsp70-9  | GIDLGT   | TNSCVAVME | GKIPK   | VIEN    | SEGSRT | TPSV    | VAFSK   | DGE   | ERIVG |
| WangBtHsp70-10 | GIDLGT   | TNSCVAVME | GKIPK   | VIEN    | SEGSRT | TPSV    | VAFSK   | DGE   | ERIVG |
| WangBtHsp70-8  | GIDLGT   | TNSCVAVME | GKIPK   | VIEN    | SEGSRT | TPSV    | VAFSK   | DGE   | ERIVG |
| WangBtHsp70-7  | GIDLGT   | TNSCVAVME | GKIPK   | VIEN    | SEGSRT | TPSV    | VAFSK   | DGE   | ERIVG |
| BtaHsc70-1     | GIDLGT   | TNSCVAVME | GKIPK   | VIEN    | SEGSRT | TPSV    | VAFSK   | DGE   | ERIVG |
| WangBtHsc70-1  | GIDLGT   | TNSCVAVME | GKIPK   | VIEN    | SEGSRT | TPSV    | VAFSK   | DGE   | ERIVG |
| BtaHsp70-6     | GIIVGNT  | SASIA     | CKED    | GKVEV   | LNA    | AGER    | TPA     | VVA   | TEK   |
| WangBtHsp70-3  | GIIVGNT  | SASIA     | CKED    | GKVEV   | LNA    | AGER    | TPA     | VVA   | TEK   |

|                |       |    |    |     |     |     |     |     |     |
|----------------|-------|----|----|-----|-----|-----|-----|-----|-----|
| BtaHsp70-7     | β7    | α2 | TT | α3  | β8  | TT  | β9  | β10 | α1  |
| BtaHsp70-7     | 70    | 80 | 90 | 100 | 110 | 120 | 130 | 140 | 150 |
| BtaHsp70-7     | TVYGF | RR | LG | RYK | DP  | IQ  | KDL | QSL | TY  |
| WangBtHsp70-1  | TVYGF | RR | LG | RYK | DP  | IQ  | KDL | QSL | TY  |
| BtaHsc70-2     | TVYGF | RR | LG | RYK | DP  | IQ  | KDL | QSL | TY  |
| WangBtHsc70-3  | TVYGF | RR | LG | RYK | DP  | IQ  | KDL | QSL | TY  |
| BtaHsp70-4     | TVYGF | RR | LG | RYK | DP  | IQ  | KDL | QSL | TY  |
| BtaHsp70-5     | TVYGF | RR | LG | RYK | DP  | IQ  | KDL | QSL | TY  |
| WangBtHsp70-4  | TVYGF | RR | LG | RYK | DP  | IQ  | KDL | QSL | TY  |
| WangBtHsp70-12 | TVYGF | RR | LG | RYK | DP  | IQ  | KDL | QSL | TY  |
| BtaHsp70-1     | TVYGF | RR | LG | RYK | DP  | IQ  | KDL | QSL | TY  |
| WangBtHsp70-5  | TVYGF | RR | LG | RYK | DP  | IQ  | KDL | QSL | TY  |
| WangBtHsp70-6  | TVYGF | RR | LG | RYK | DP  | IQ  | KDL | QSL | TY  |
| WangBtHsp70-2  | TVYGF | RR | LG | RYK | DP  | IQ  | KDL | QSL | TY  |
| WangBtHsp70-11 | TVYGF | RR | LG | RYK | DP  | IQ  | KDL | QSL | TY  |
| WangBtHsp70-13 | TVYGF | RR | LG | RYK | DP  | IQ  | KDL | QSL | TY  |
| BtaHsp70-2     | TVYGF | RR | LG | RYK | DP  | IQ  | KDL | QSL | TY  |
| WangBtHsp70-14 | TVYGF | RR | LG | RYK | DP  | IQ  | KDL | QSL | TY  |
| BtaHsp70-3     | TVYGF | RR | LG | RYK | DP  | IQ  | KDL | QSL | TY  |
| WangBtHsp70-9  | TVYGF | RR | LG | RYK | DP  | IQ  | KDL | QSL | TY  |
| WangBtHsp70-10 | TVYGF | RR | LG | RYK | DP  | IQ  | KDL | QSL | TY  |
| WangBtHsp70-8  | TVYGF | RR | LG | RYK | DP  | IQ  | KDL | QSL | TY  |
| WangBtHsp70-7  | TVYGF | RR | LG | RYK | DP  | IQ  | KDL | QSL | TY  |
| BtaHsc70-1     | TVYGF | RR | LG | RYK | DP  | IQ  | KDL | QSL | TY  |
| WangBtHsc70-1  | TVYGF | RR | LG | RYK | DP  | IQ  | KDL | QSL | TY  |
| BtaHsp70-6     | TVYGF | RR | LG | RYK | DP  | IQ  | KDL | QSL | TY  |
| WangBtHsp70-3  | TVYGF | RR | LG | RYK | DP  | IQ  | KDL | QSL | TY  |





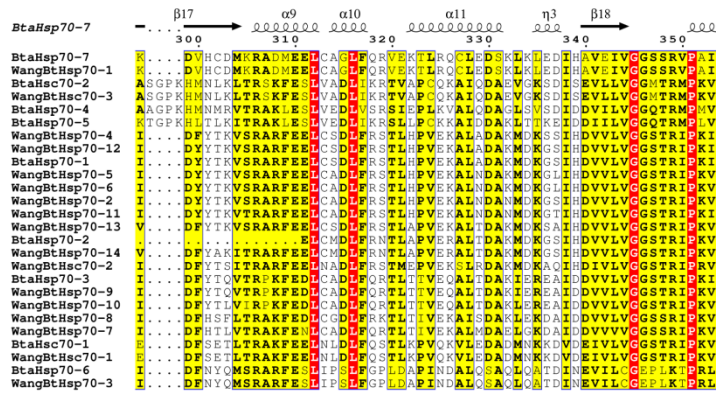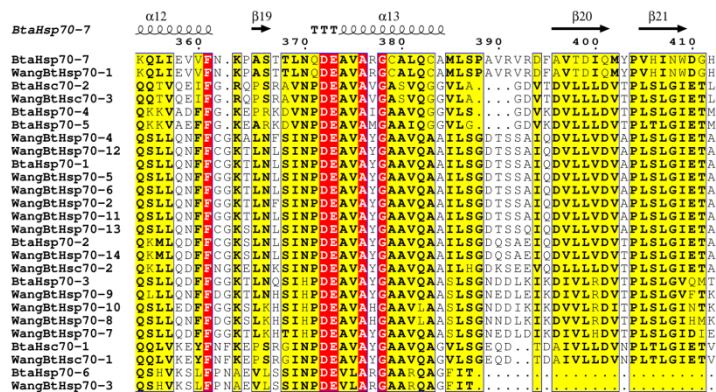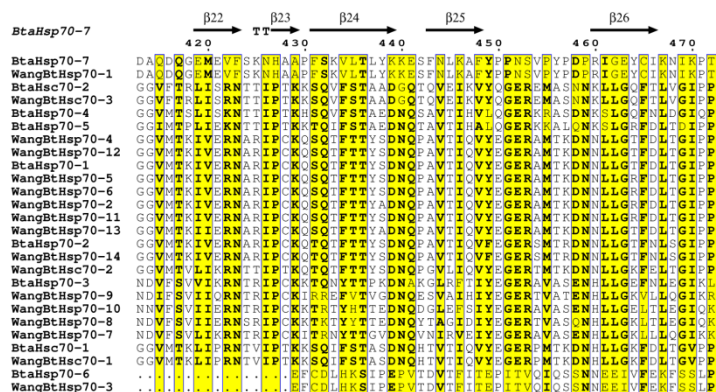

$\beta 27$   $\beta 28$   
 TT 480 TT 490 500 TT 510 520 530  
 BtaHsp70-7 A G G G T Q R V L K I R I N I H G I V S V S S A S L I E Q I K G S A E P M D V E V N E E E H K E K E Q P A Q E T T Q E  
 WangBtHsp70-1 A G G G T Q R V L K I R I N I H G I V S V S S A S L I E Q I K G S A E P M D V E V N E E E H K E K E Q P A Q E T T Q E  
 BtaHsc70-2 A P R G V P Q I E V T F D I D A N G I V H V S A R . . . . .  
 WangBtHsc70-3 A P R G V P Q I E V T F D I D A N G I L N V S A K . . . . .  
 BtaHsp70-4 A P R G V P Q I E V T F D I D A N G I L N V S A K . . . . .  
 BtaHsp70-5 A P R G V P Q I E V A F D I D A N G I L N I T A K . . . . .  
 WangBtHsp70-4 A P R G V P K I D V T F D I D A N G I L N V S A K . . . . .  
 WangBtHsp70-12 A P R G V P K I D V T F D I D A N G I L N V S A K . . . . .  
 BtaHsp70-1 A P R G V P K I D V T F D I D A N G I L N V S A K . . . . .  
 WangBtHsp70-5 A P R G V P K I E V T F D I D A N G I L N V S A K . . . . .  
 WangBtHsp70-6 A P R G V P K I D V T F D I D A N G I L N V S A K . . . . .  
 WangBtHsp70-2 A P R G V P K I D V T F D I D A N G I L N V S A K . . . . .  
 WangBtHsp70-11 A P R G V P K I D V T F D I D A N G I L N V S A K . . . . .  
 WangBtHsp70-13 A P R G V P K I D V T F D I D A N G I L N V A A K . . . . .  
 BtaHsp70-2 A P R G V P K I E V T F D I D A N G I L N V S A K . . . . .  
 WangBtHsp70-14 A P R G V P K I E V T F D I D A N G I L N V S A K . . . . .  
 WangBtHsc70-2 A P R G V P Q I E V T F D I D A N G I L N V T A I . . . . .  
 BtaHsp70-3 A P K F V P S V D V T F D I N A E G I L L V T A E . . . . .  
 WangBtHsp70-9 A P K G V T K V D V S F D I N E E G I L S V S V E . . . . .  
 WangBtHsp70-10 A P K G E T R V A V T F D I N E E G I L S V S V A . . . . .  
 WangBtHsp70-8 A P K G T V A V T F D I D A N G I L N V S A K . . . . .  
 WangBtHsp70-7 A P R G V P N D V S F D I N A E G I L S V S A E . . . . .  
 BtaHsc70-1 A P R G V P H I E V T F E I D A N G I L Q V S A E . . . . .  
 WangBtHsc70-1 A P R G V P H I E V T F E I D A N G I L Q V S A E . . . . .  
 BtaHsp70-6 I S K T V H L L K D N K S E I I V T A A S C S A S E S . . . . .  
 WangBtHsp70-3 I S K T V H L L K D N K S E I I V T A A S C S A S E S . . . . .

$\beta 29$   $\beta 30$   
 TT 540 TT 550 TT 560 570 580 590  
 BtaHsp70-7 Q Q Q P P E A N A N S Q D A Q P N G P A E D D D A E K K E K R K T V K S V D L P I E E F L P G F S S E V S S F F E A  
 WangBtHsp70-1 Q Q Q P P E A N A N S Q D A Q P N G P A E D D D A E K K E K R K T V K S V D L P I E E F L P G F S S E V S S F F E A  
 BtaHsc70-2 . . . . . D K G T G K E Q Q V I T I S S G G L S K D E I E N M V K S  
 WangBtHsc70-3 . . . . . D K G T G K E Q Q V I T I S S G G L S K D E I E N M V K S  
 BtaHsp70-4 . . . . . D K N T G R E O K I T I K A S S G L S E A E I E K M V R D  
 BtaHsp70-5 . . . . . D K A T G K E Q S I I T K S S G G L S E E E I N K M I Q D  
 WangBtHsp70-4 . . . . . E N S T G K S K N I V I K N D K G L S R E I D R M V N E  
 WangBtHsp70-12 . . . . . E N S T G K S K N I V I K N D K G L S R E I D R M V N E  
 BtaHsp70-1 . . . . . E N S T G K S K N I V I K N D K G L S R E I D R M V N E  
 WangBtHsp70-5 . . . . . E N S T G R E R N I V I K N D K G L S R E I D R M V N E  
 WangBtHsp70-6 . . . . . E N S T G R E R N I V I K N D K G L S R E I D R M V N E  
 WangBtHsp70-2 . . . . . E N S T G R E R N I V I K N D K G L S R E I D R M V N E  
 WangBtHsp70-11 . . . . . E N S T G R E R N I V I K N D K G L S R E I D R M V N E  
 WangBtHsp70-13 . . . . . E N S T G K S K N I V I K N D K G L S R E I D R M V N E  
 BtaHsp70-2 . . . . . D N S S G K M E R I T I I K N D K G L S K E D I E K M L A D  
 WangBtHsp70-14 . . . . . D N S S G K M E R I T I I K N D K G L S K E D I E K M L A D  
 WangBtHsc70-2 . . . . . E K S T G K E N K I T I I K N D K G L S K E D I E K M V S D  
 BtaHsp70-3 . . . . . E K G T D K S E N I T I I T N E K G L T D K D I R M I Q E  
 WangBtHsp70-9 . . . . . E K G T N K S E Q I T I I T N E K G L S K G D I R M I R E  
 WangBtHsp70-10 . . . . . E K G T N K S E H I T I I T N E K G L S K G D I R M I Q E  
 WangBtHsp70-8 . . . . . E R G T D K S E N I T I I T N E K G L S K E D I R M I K E  
 WangBtHsp70-7 . . . . . E S G T G N S A N I T I I T N E K G L S K E D I R M I R E  
 BtaHsc70-1 . . . . . D K G T G N R E K I V I T N D Q N R L T P D D I E R M I K E  
 WangBtHsc70-1 . . . . . D K G T G N R E K I V I T N D Q N R L T P D D I E R M I K E  
 BtaHsp70-6 . . . . . E K T G K S E H I T I I T N E K G L S K G D I R M I Q E  
 WangBtHsp70-3 . . . . . K L N G K V I T I S S K D S S L L L I D

$\alpha 14$   $\alpha 15$   
 600 610 620 630 640  
 BtaHsp70-7 E G Q M M A A D R Q E K D R V D A R N S L E E Y V Y L R K K L S E L S . . . . . A Y V V E K D R S S L V E  
 WangBtHsp70-1 E G Q M M A A D R Q E K D R V D A R N S L E E Y V Y L R K K L S E L S . . . . . A Y V V E K D R S S L V E  
 BtaHsc70-2 A E E A Q D D K K K E R V E A I N Q A E G I I H D T E S K M I T E F K . . . . . D Q L P S E E C D K L R E  
 WangBtHsc70-3 A E E A Q D D K K K E R V E A I N Q A E G I I H D T E S K M I T E F K . . . . . D Q L P S E E C D K L R E  
 BtaHsp70-4 A E A N S E A D R K F E D L I O A R N Q A D H I N S T I T K K L K E A G . . . . . D K V S P E E K T S I E Q  
 BtaHsp70-5 A C T N K K E D K K F E L V Q I R N Q A D G M I H T I R K I L K E I K . . . . . N E D . . . E K N K L E S  
 WangBtHsp70-4 A C K Y K E D E K K R A K I A A R N Q L E S Y I F N V K Q A V E A G . . . . . D K L P E S D K Q L V H D  
 WangBtHsp70-12 A C K Y K E D E K K R A K I A A R N Q L E S Y I F N V K Q A V E A G . . . . . D K L P E S D K Q L V R D  
 BtaHsp70-1 A C K Y K E D E K K R A K I A A R N Q L E S Y I F N V K Q A V E A G . . . . . D K L P E S D K Q L V R D  
 WangBtHsp70-5 A C R Y K E D D K K R A K V A A R N Q L E S Y I F N V K Q A A E A G . . . . . D K L S A T D K Q S I Q E  
 WangBtHsp70-6 A C R Y K E D D K K R A K V A A R N Q L E S Y I F N V K Q A A E A G . . . . . D K L S A T D K Q S I Q E  
 WangBtHsp70-2 A C O Y K E D D K K R A K V A A R N Q L E S Y I F N V K Q A A E A G . . . . . D K L S A A D K Q S I L E  
 WangBtHsp70-11 A C R Y K E D D K K R A K V A A R N Q L E S Y I F N V K Q A A E A G . . . . . D K L S A D D K Q S V Q E  
 WangBtHsp70-13 A C R Y K E D D K K R A R V A A R N Q L E A Y I F N V K Q A V E A G . . . . . S K L S E V D K N S V K E  
 BtaHsp70-2 A C K Y K E D E D K K E R V T A R N Q L E G Y I F N V K Q A V E A G . . . . . S K L S E T D K K A V I L D  
 WangBtHsp70-14 A C K Y K E D E D K K E R V T A R N Q L E G Y I F N V K Q A V E A G . . . . . S K L S E T D K K A V I L D  
 WangBtHsc70-2 A C K Y K E D E D K K R Q V I A A K N S L E S Y C F N M K S T M E D D K L K . . . . . D K I S E S D K T A I M E  
 BtaHsp70-3 A R R K K E D D K K H L A R S R A R N Q L E D Y T Y K M Q E L K A A E S . . . . . K L C K T D S R L K E  
 WangBtHsp70-9 A R S F K E D D K K H L A R S R A R N Q L E D Y T Y K M Q E L K A A E S . . . . . Q L S Q A D K S S M K E  
 WangBtHsp70-10 A R R K K E D D K K H L A R S R A R N Q L E D Y T Y K M Q E L K A A E S . . . . . K L S K T D S R L K E  
 WangBtHsp70-8 A R R K K E D D K K H L A R S R A R N Q L E D Y T Y K M Q E L K A A E S . . . . . E L S Q A D K S C L K D  
 WangBtHsp70-7 A K L F R K E D E K K H L A R S R A R N Q L E D Y T Y K M Q E L K A A E S . . . . . E L S Q A D K C O M K E  
 BtaHsc70-1 A K L F A D D K K L K E R V A R N L E S Y A Y S L R N Q L A D K E K L G S K V D G M I L F Q S D E E K T R M E E  
 WangBtHsc70-1 A K L F A D D K K L K E R V A R N L E S Y A Y S L R N Q L A D K E K L G S K L S . . . . . D E E K T R M E E  
 BtaHsp70-6 G K I N A E Q A I E I H L L N K S M E E L Q M Y T M D L V A G V F L F V P . . . . . Q I D G L S R K P R T S I A M  
 WangBtHsp70-3 V C I N A E Q A I E I H L L N K S M E E L Q M Y T M D L V A G V E A S . . . . . L . . . . L . .



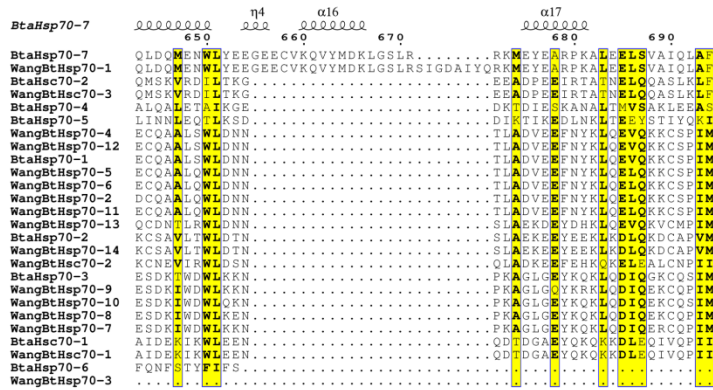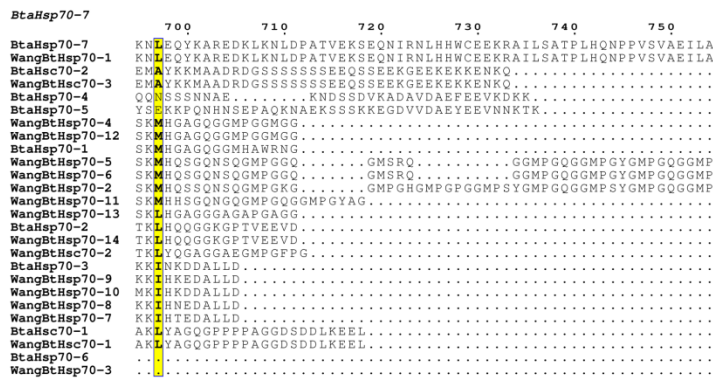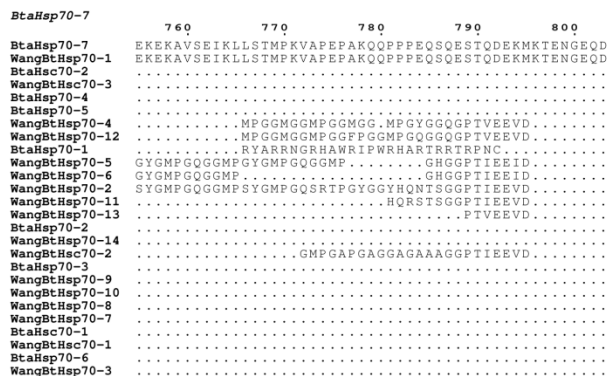

## Supplementary Figure S8. The secondary structures of *Bemisia tabaci*

HSP70s.  $\alpha$ -helices and  $\beta$ -sheets were represented by yellow boxes and blue

arrows shown above the sequence, respectively. The conserved domain of

HSP70s were marked with a line under the sequences.

# BtaHsp90A4

1  
BtaHsp90A4 .....MSSWCTLGL  
WangBtHsp90A1 .....  
BtaHsp90A3 .....  
WangBtHsp90A2 .....  
BtaHsp90A2 MFRGSKLIALSLGLLIFALAGARAEDEITEKTIDIDLGASREGSRDTAEVQREERIL  
WangBtHsp90B1 MFRGSKLIALSLGLLIFALAGARAEDEITEKTIDIDLGASREGSRDTAEVQREERIL  
BtaHsp90A1 .....

BtaHsp90A4  
10 20 30 40 50 60  
α1 α2  
BtaHsp90A4 FRSRSEMPEDATMFOAEITFVFOAEIAQLMSLIVNTFYSNKEIFLRELISNSDALDKIRY  
WangBtHsp90A1 .....MPEDATMFOAEITFVFOAEIAQLMSLIVNTFYSNKEIFLRELISNSDALDKIRY  
BtaHsp90A3 .....MPEDATMFOAEITFVFOAEIAQLMSLIVNTFYSNKEIFLRELISNSDALDKIRY  
WangBtHsp90A2 .....MPEDVNMFOAEITFVFOAEIAQLMSLIVNTFYSNKEIFLRELISNSDALDKIRY  
BtaHsp90A2 IDGLNVAQLRELKKAQKQTFQAEVNRMMKLINSLYRNKEIFLRELISNSDALDKIRL  
WangBtHsp90B1 IDGLNVAQLRELKKAQKQTFQAEVNRMMKLINSLYRNKEIFLRELISNSDALDKIRL  
BtaHsp90A1 .....MDDDETRGFQSEVKKQLLSLMHSLSYSNKEIFLRELISNSDAADKLR

BtaHsp90A4  
70 80 90 100 110 120  
η1 β1 β2 α3 TT α4  
BtaHsp90A4 ES�TDPSRLESGRKELFKIIPNKNNDNTLTLLDSGIGMTKADLVNNGTIAKSGTKAFME  
WangBtHsp90A1 ES�TDPSRLESGRKELFKIIPNKNNDNTLTLLDSGIGMTKADLVNNGTIAKSGTKAFME  
BtaHsp90A3 .....MTELSPSLIRNGIGMTKADLVNNGTIAKSGTKAFME  
WangBtHsp90A2 ES�TDPSRLESGRKELFKIIPNKNDRTLTIIDTIGMTKADLVNNGTIAKSGTKAFME  
BtaHsp90A2 ES�TDPSRLESGRKELFKIIPNKNDRTLTIIDTIGMTKADLVNNGTIAKSGTKAFME  
WangBtHsp90B1 ES�TDPSRLESGRKELFKIIPNKNDRTLTIIDTIGMTKADLVNNGTIAKSGTKAFME  
BtaHsp90A1 RALSSEELVLEGEALRVRLSFDKDKRTLTLSDNIGMTKADLVNNGTIAKSGTKAFME

BtaHsp90A4  
130 140 150 160 170 180  
TT η2 β3 T...T β4 β5  
BtaHsp90A4 LAAG...ADISMIGQFGVGFYSAFVADTVVVSXHN...DDQYIWESAGGSFTIR  
WangBtHsp90A1 LAAG...ADISMIGQFGVGFYSAFVADTVVVSXHN...DDQYIWESAGGSFTIR  
BtaHsp90A3 LAAG...ADISMIGQFGVGFYSAFVADTVVVSXHN...DDQYIWESAGGSFTIR  
WangBtHsp90A2 LAAG...ADISMIGQFGVGFYSAFVADTVVVSXHN...DDQYIWESAGGSFTIR  
BtaHsp90A2 MNEKSEVKKQDNDNMIGQFGVGFYSAFVADTVVVSXHN...DDQYIWESAGGSFTIR  
WangBtHsp90B1 MNEKSEVKKQDNDNMIGQFGVGFYSAFVADTVVVSXHN...DDQYIWESAGGSFTIR  
BtaHsp90A1 LGSD...QSKESQIGQFGVGFYSAFVADTVVVSXHN...DDQYIWESAGGSFTIR

BtaHsp90A4  
190 200 210 220 230 240  
β6 TT η3 α5 β7 TT  
BtaHsp90A4 PDHSEPLGRGKRIIMHMKEDMTLEERKIKKIVKKSQFICYPDKLLVEKERDKELSED  
WangBtHsp90A1 PDHSEPLGRGKRIIMHMKEDMTLEERKIKKIVKKSQFICYPDKLLVEKERDKELSED  
BtaHsp90A3 SDHSEPLGRGKRIIMHMKEDMTLEERKIKKIVKKSQFICYPDKLLVEKERDKELSED  
WangBtHsp90A2 SDHSEPLGRGKRIIMHMKEDMTLEERKIKKIVKKSQFICYPDKLLVEKERDKELSED  
BtaHsp90A2 DPRCTTLKRGKRIISLQKDEAADVEIDLLKNLIRKKSQFINFPIYIWSSKIVTEVVPVD  
WangBtHsp90B1 DPRCTTLKRGKRIISLQKDEAADVEIDLLKNLIRKKSQFINFPIYIWSSKIVTEVVPVD  
BtaHsp90A1 TIIRKE...DRGTEHLLHKEGDEELNDWRLRSIISKYSQHSLEVDLECKN...

BtaHsp90A4  
250 260 270 280 290  
TT η4 β8 η5 TT  
BtaHsp90A4 EEEEEKKKEDKE...EDKDTPKIEDAEDD...CKEKKKKKKTIKKEYTDEEENKTKPIWT  
WangBtHsp90A1 EEEEEKKKEDKE...EDKDTPKIEDAEDD...CKEKKKKKKTIKKEYTDEEENKTKPIWT  
BtaHsp90A3 EEEEEKKKEDKE...EDKDTPKIEDAEDD...CKEKKKKKKTIKKEYTDEEENKTKPIWT  
WangBtHsp90A2 EEEEEKKKEDKE...EDKDTPKIEDAEDD...CKEKKKKKKTIKKEYTDEEENKTKPIWT  
BtaHsp90A2 EEEEEKKKEDKE...EDKDTPKIEDAEDD...CKEKKKKKKTIKKEYTDEEENKTKPIWT  
WangBtHsp90B1 EEEEEKKKEDKE...EDKDTPKIEDAEDD...CKEKKKKKKTIKKEYTDEEENKTKPIWT  
BtaHsp90A1 EEEEEKKKEDKE...EDKDTPKIEDAEDD...CKEKKKKKKTIKKEYTDEEENKTKPIWT

BtaHsp90A4  
300 310 320 330 340 350  
η6 α6 β9 β10 TT  
BtaHsp90A4 RNFDDTTTEYGEFYKSLNDWSDHFAVRRHFSVEGQLEFKALLFVPRRAADPDLFENK.KK  
WangBtHsp90A1 RNFDDTTTEYGEFYKSLNDWSDHFAVRRHFSVEGQLEFKALLFVPRRAADPDLFENK.KK  
BtaHsp90A3 RNFDDTTTEYGEFYKSLNDWSDHFAVRRHFSVEGQLEFKALLFVPRRAADPDLFENK.KK  
WangBtHsp90A2 RNFDDTTTEYGEFYKSLNDWSDHFAVRRHFSVEGQLEFKALLFVPRRAADPDLFENK.KK  
BtaHsp90A2 RKNNEEDDAEYNEFYKSMRDNDPLAKTHFVAEGEVTFKSLFVPRRAADPDLFENK.KK  
WangBtHsp90B1 RKNNEEDDAEYNEFYKSMRDNDPLAKTHFVAEGEVTFKSLFVPRRAADPDLFENK.KK  
BtaHsp90A1 RKNNEEDDAEYNEFYKSMRDNDPLAKTHFVAEGEVTFKSLFVPRRAADPDLFENK.KK

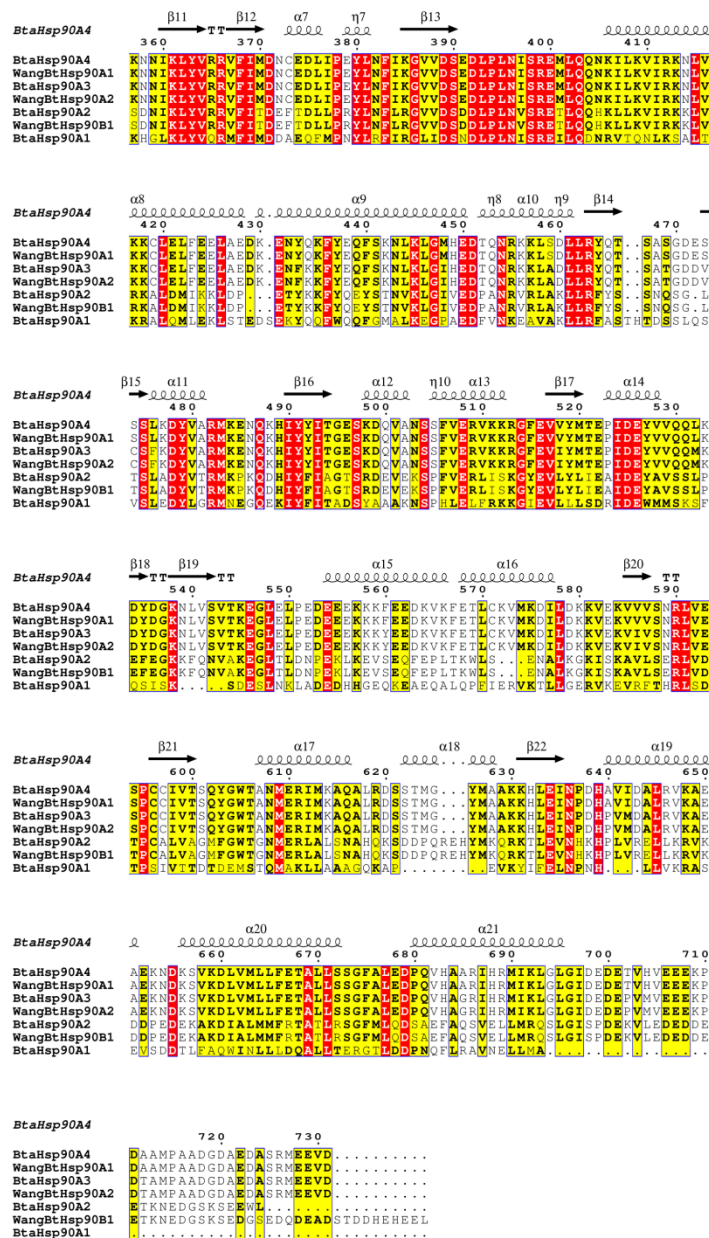

**Supplementary Figure S9. The secondary structures of *Bemisia tabaci* HSP90s.**  $\alpha$ -helices and  $\beta$ -sheets were represented by yellow boxes and blue arrows shown above the sequence, respectively. The conserved domain of HSP90s were marked with a line under the sequences.

## Supplementary data sheet 1

### 1. Sequence logos for the conserved motifs of sHSPs in *Bemisia tabaci*

#### BtasHsp Motif

##### Motif 1

E-value 5.2e-138

Width 39

Sites 9

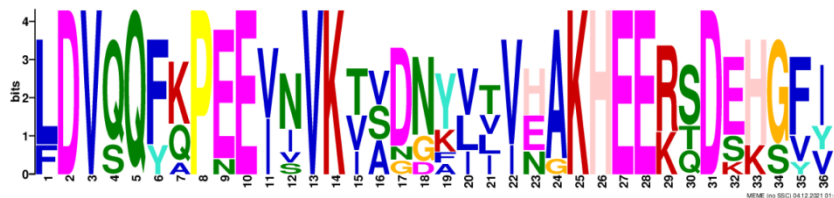

##### Motif 2

E-value 2.6e-133

Width 39

Sites 9

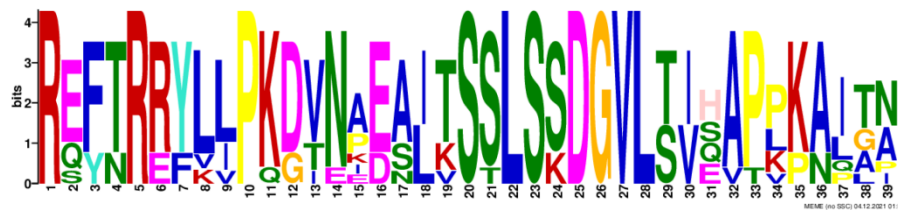

##### Motif 3

E-value 9.8e-077

Width 40

Sites 7

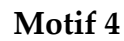

E-value 1.5e-041

Width 19

Sites 9

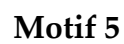

E-value 6.6e-035

Width 24

Sites 9

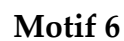

E-value 3.1e-010

Width 40

Sites 2

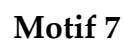

E-value 7.5e+000

Width 10

Sites 2

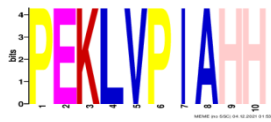

### Motif 8

E-value 1.0e+002

Width 10

Sites 2

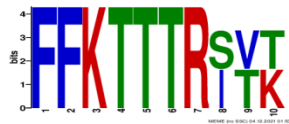

### Motif 9

E-value 6.2e+003

Width 10

Sites 2

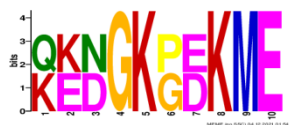

### Motif 10

E-value 5.7e+004

Width 14

Sites 2

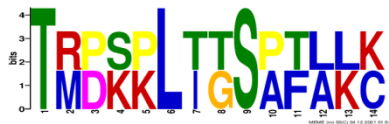

### Motif 11

E-value 7.8e+005

Width 10

Sites 2

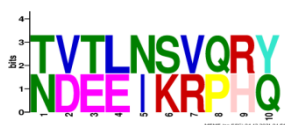

### Motif 12

E-value 8.2e+005

Width 10

Sites 2

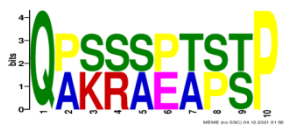

## 2. Sequence logos for the conserved motifs of HSP40s in *Bemisia tabaci*

### BtaHsp40 Motif

#### Motif 1

E-value 1.7e-031

Width 34

Sites 4

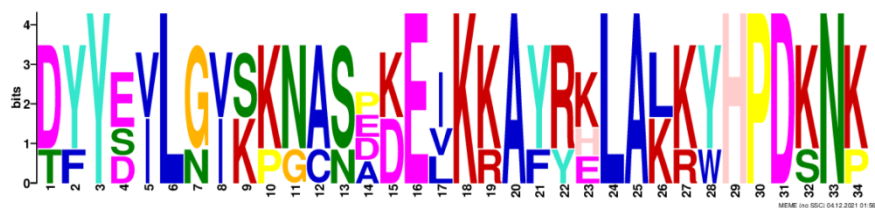

## Motif 2

E-value 2.5e-019

Width 30

Sites 4

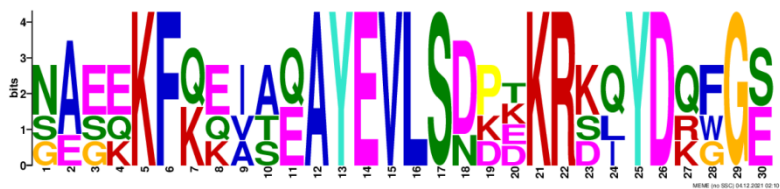

## Motif 3

E-value 4.3e-002

Width 34

Sites 3

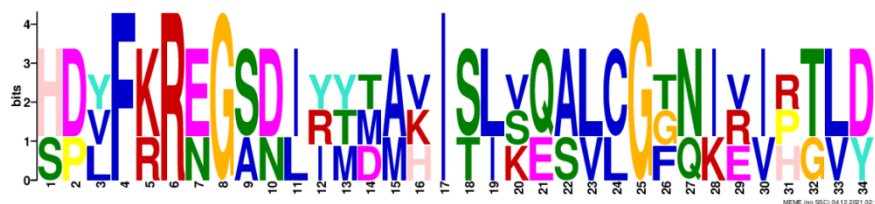

## Motif 4

E-value 3.7e+001

Width 30

Sites 2



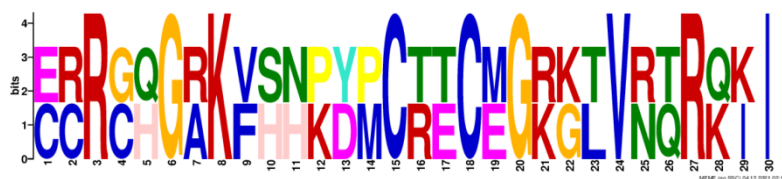

Sites 4

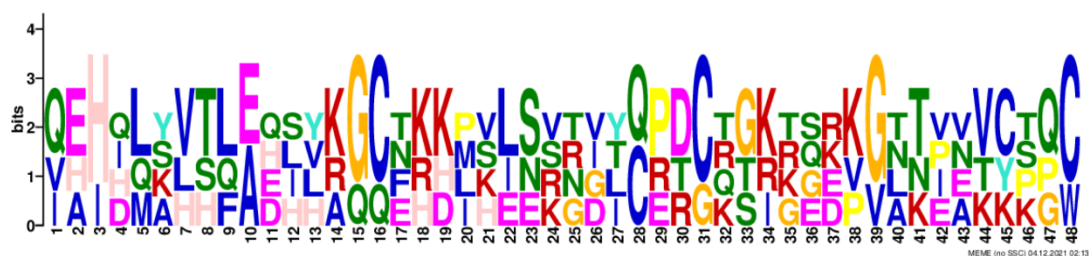

Sites 2

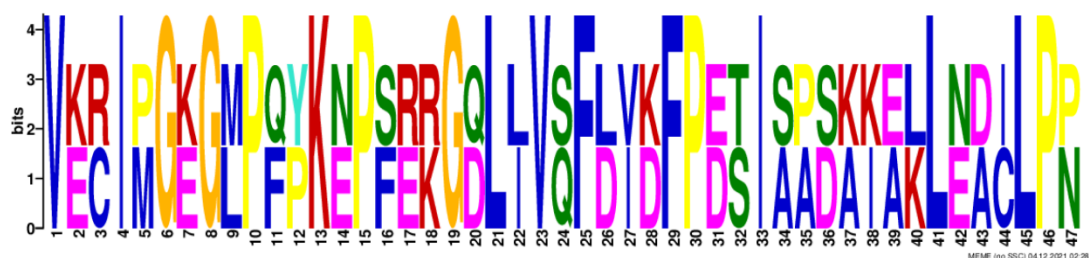

Sites 2

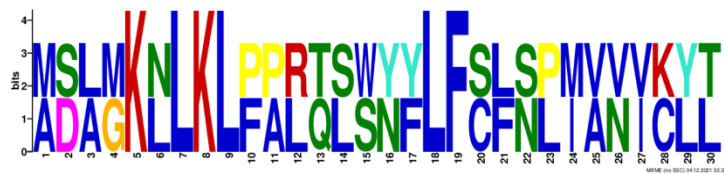

### Motif 8

E-value 2.7e+004

Width 31

Sites 2

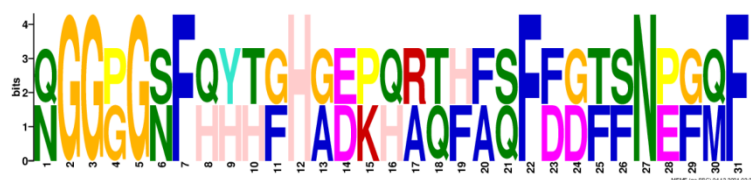

### Motif 9

E-value 1.1e+004

Width 36

Sites 2

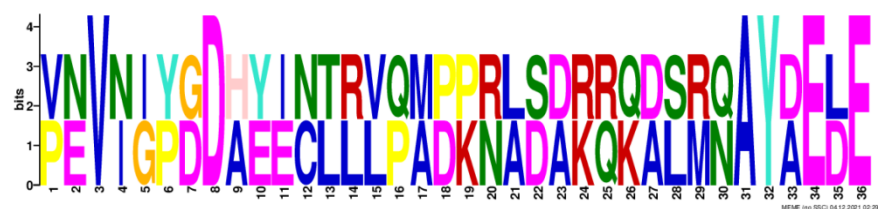

### Motif 10

E-value 1.2e+004

Width 30

Sites 2

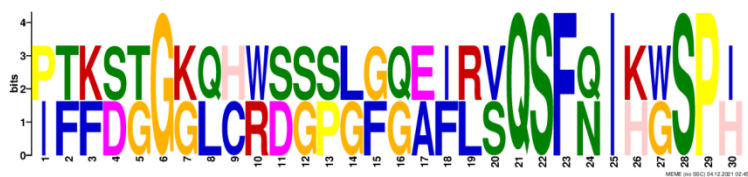

## Motif 11

E-value 1.9e+004

Width 30

Sites 2

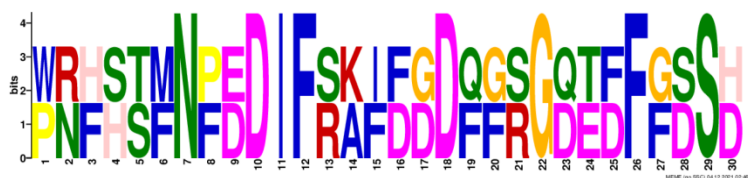

## Motif 12

E-value 1.0e+005

Width 30

Sites 2

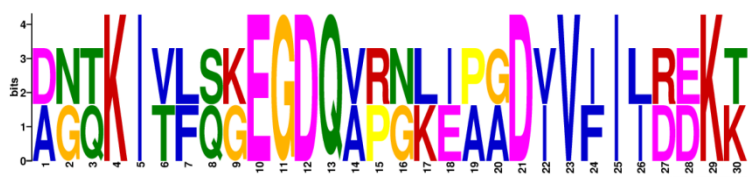

## Motif 13

E-value 4.0e+005

Width 30

Sites 2

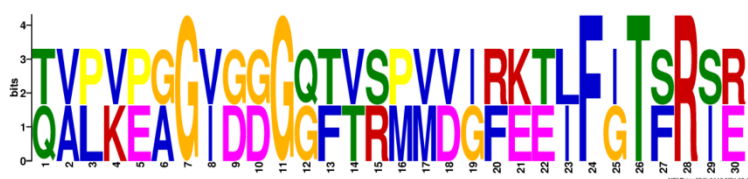

## Motif 14

E-value 9.3e+005

Width 30

Sites 2

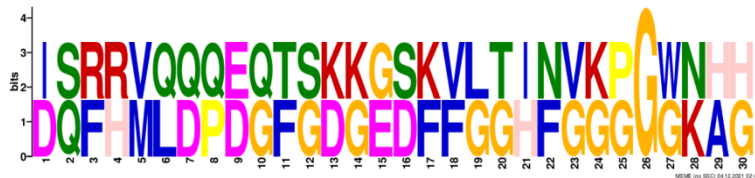

## 3. Sequence logos for the conserved motifs of HSP60s in *Bemisia tabaci*

### BtaHsp60 Motif

#### Motif 1

E-value 4.2e-008

Width 70

Sites 2

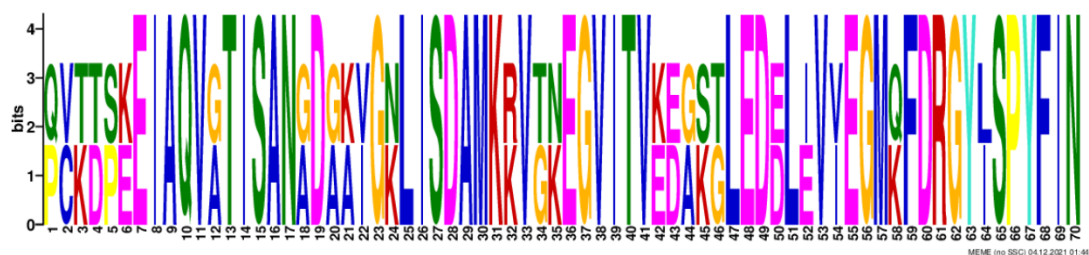

#### Motif 2

E-value 2.0e-006

Width 68

Sites 2

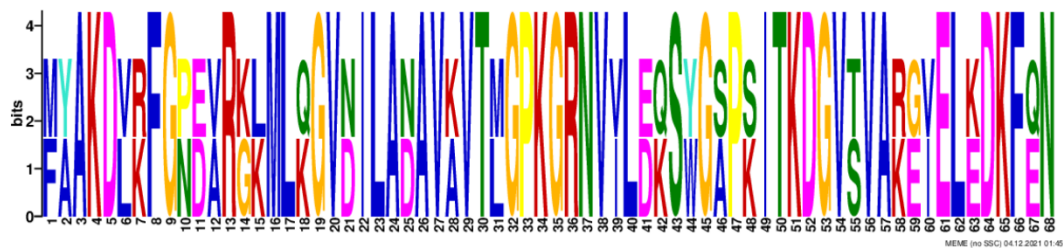

### Motif 3

E-value 1.6e-003

Width 56

Sites 2

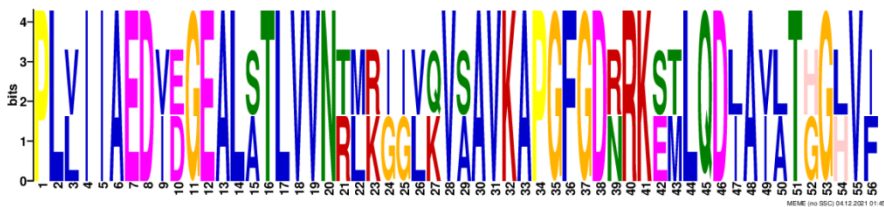

### Motif 4

E-value 3.5e-003

Width 59

Sites 2

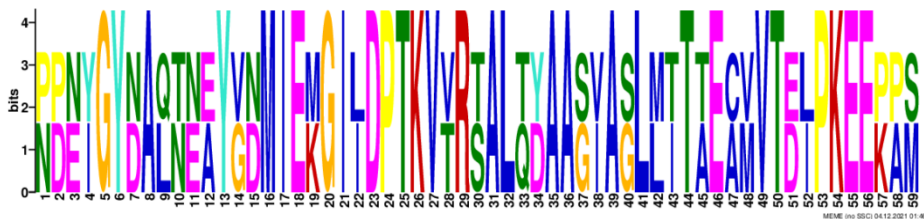

### Motif 5

E-value 4.2e-002

Width 70

Sites 2

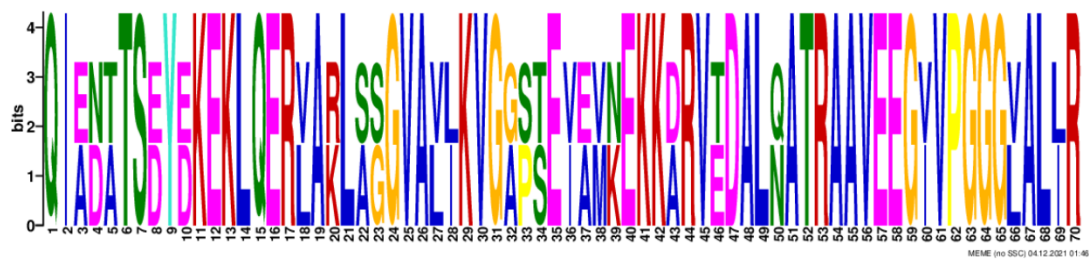

## Motif 6

E-value 2.0e+001

Width 31

Sites 2

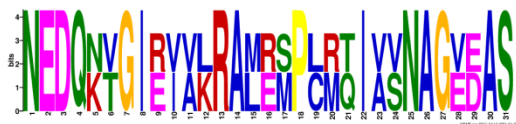

## Motif 7

E-value 1.5e+002

Width 32

Sites 2

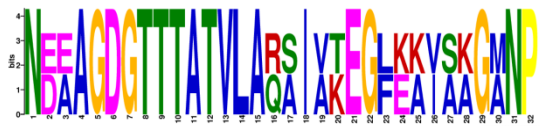

## Motif 8

E-value 4.6e+002

Width 30

Sites 2

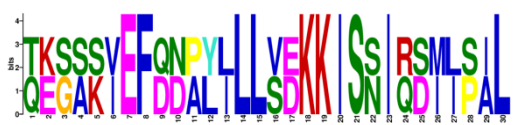

## Motif 9

E-value 3.3e+003

Width 36

Sites 2

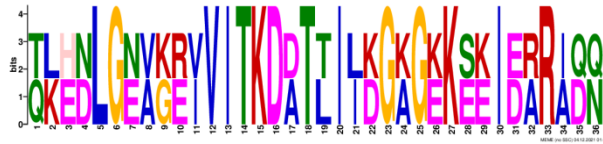

#### 4. Sequence logos for the conserved motifs of HSP70s in *Bemisia tabaci*

##### BtaHsp70 Motif

##### Motif 1

E-value 7.3e-179

Width 70

Sites 7

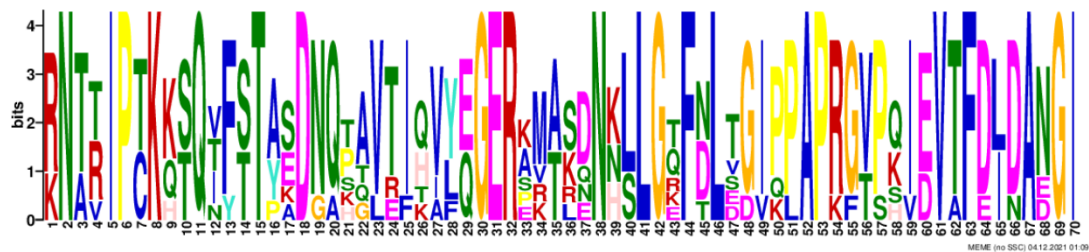

##### Motif 2

E-value 5.0e-147

Width 43

Sites 9

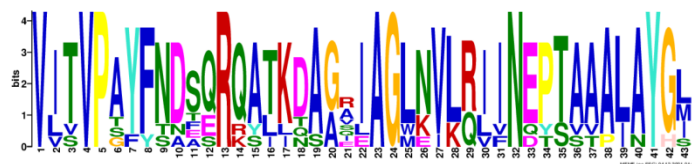

##### Motif 3

E-value 1.8e-149

Width 70

Sites 10

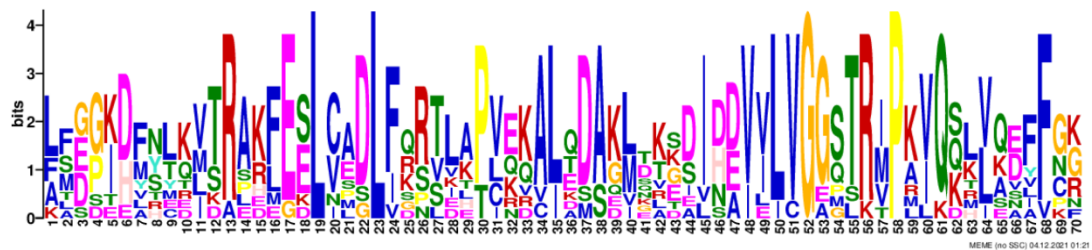

#### Motif 4

E-value 7.4e-122

Width 54

Sites 9

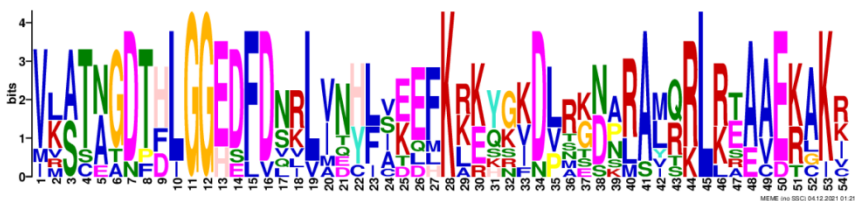

#### Motif 5

E-value 9.3e-088

Width 42

Sites 8

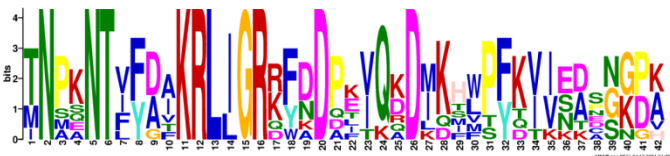

#### Motif 6

E-value 1.2e-064



Width 41

Sites 10

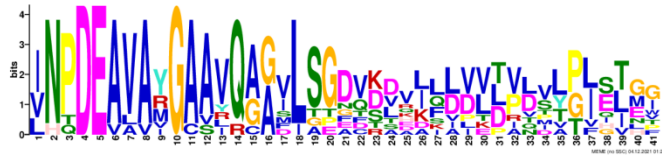

### Motif 7

E-value 4.4e-049

Width 30

Sites 8

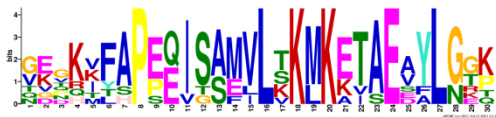

### Motif 8

E-value 1.5e-046

Width 41

Sites 8

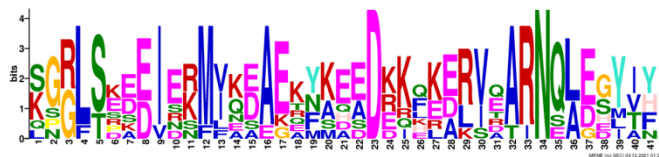

### Motif 9

E-value 3.8e-046

Width 39

Sites 6

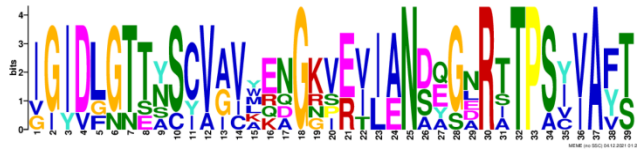

## Motif 10

E-value 4.4e-033

Width 30

Sites 6

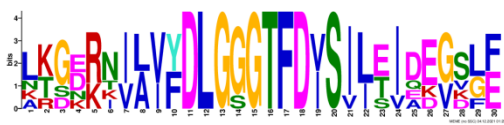

## Motif 11

E-value 1.4e-012

Width 55

Sites 5

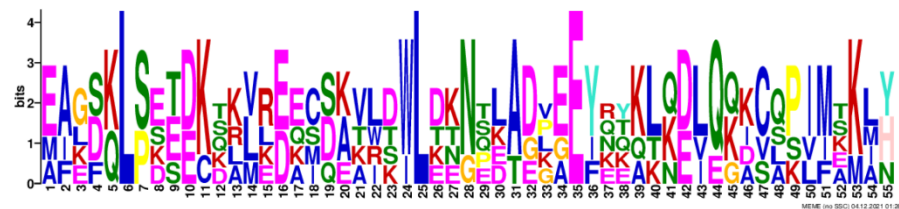

## Motif 12

E-value 8.9e+001

Width 30

Sites 2

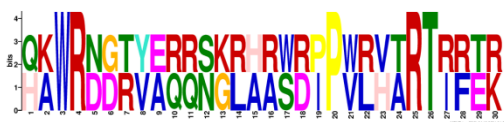

## Motif 13

E-value 1.3e+003

Width 43

Sites 2

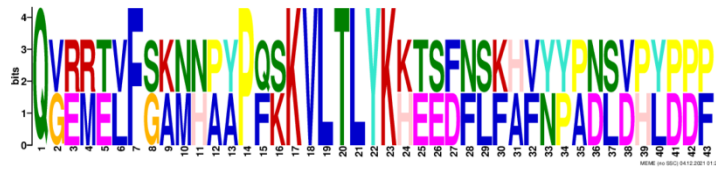

### Motif 14

E-value 1.5e+004

Width 30

Sites 2

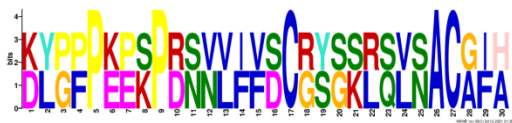

### Motif 15

E-value 4.4e+004

Width 30

Sites 2

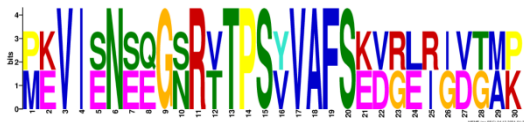

### Motif 16

E-value 4.6e+004

Width 30

Sites 2

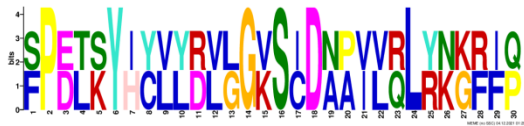

## Motif 17

E-value 4.9e+004

Width 38

Sites 2

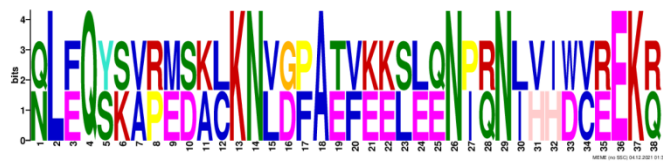

## Motif 18

E-value 2.8e+004

Width 39

Sites 2

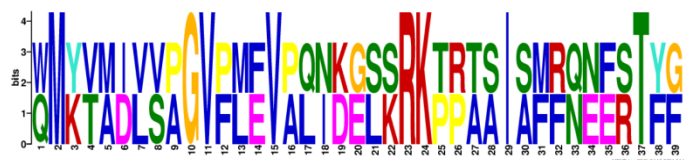

## Motif 19

E-value 4.1e+004

Width 30

Sites 2

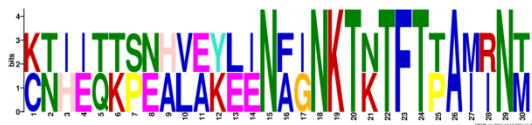

## Motif 20

Sites 2

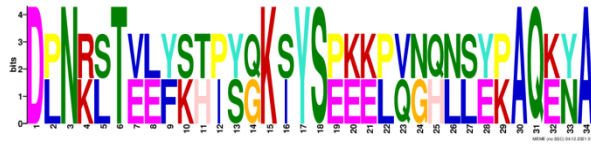

### 5. Sequence logos for the conserved motifs of HSP90s in *Bemisia tabaci*

### BtaHsp90 Motif

### Motif 1

Sites 4

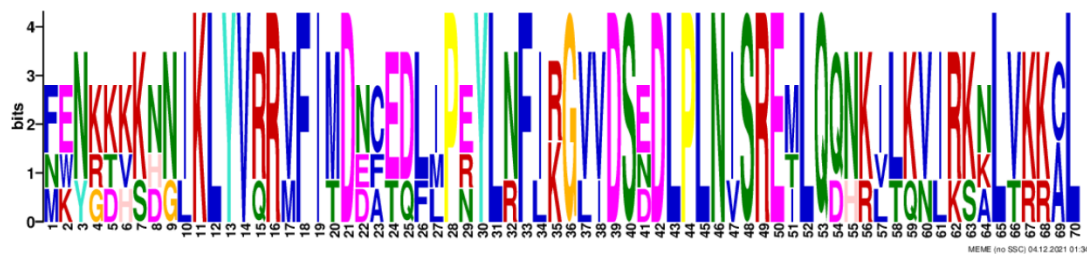

## Motif 2

Sites 4

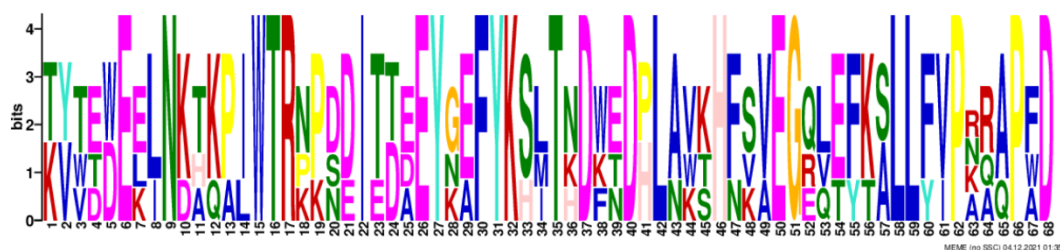

### Motif 3

E-value 4.1e-049

Width 61

Sites 4

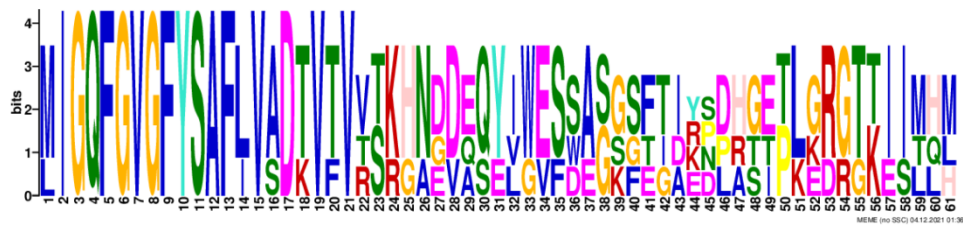

### Motif 4

E-value 1.6e-045

Width 70

Sites 4

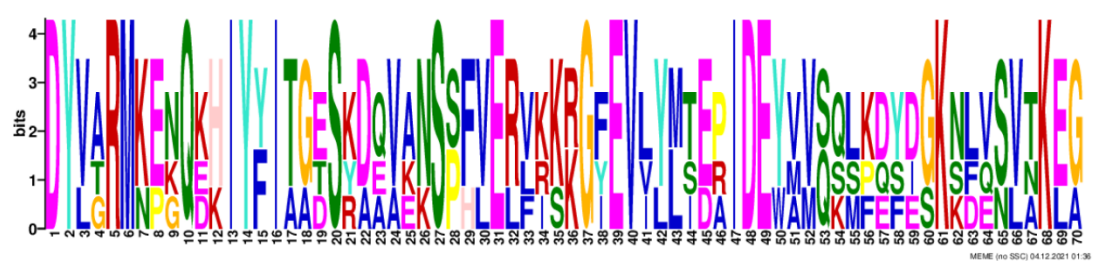

### Motif 5

E-value 2.6e-029

Width 55

Sites 3

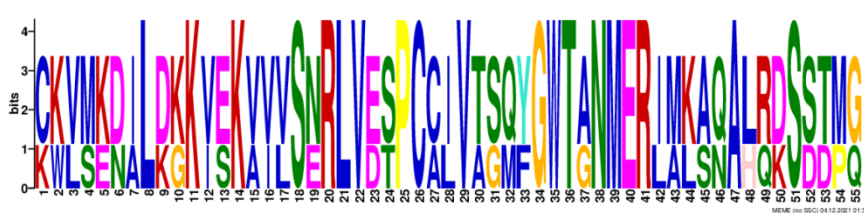

### Motif 6

E-value 3.8e-027

Width 31

Sites 4

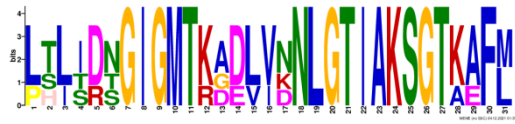

### Motif 7

E-value 4.6e-023

Width 41

Sites 4

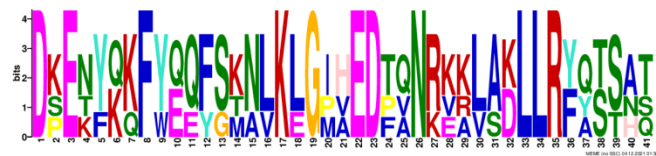

### Motif 8

E-value 1.1e-015

Width 59

Sites 2

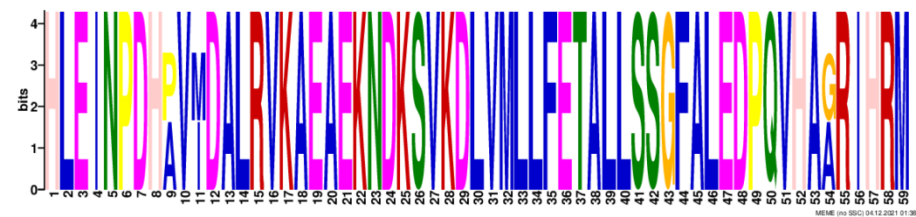

### Motif 9

E-value 1.8e-018

Width 51

Sites 3

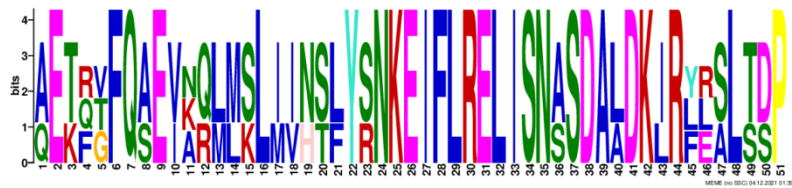

### Motif 10

E-value 2.4e-008

Width 30

Sites 4

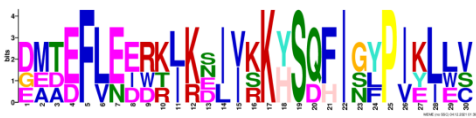

### Motif 11

E-value 3.6e-003

Width 30

Sites 2

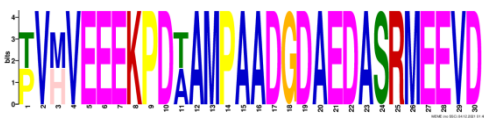

### Motif 12

E-value 2.8e+004

Width 34

Sites 2

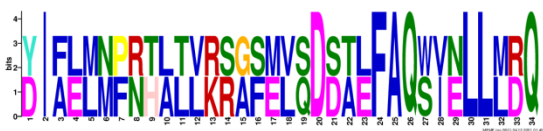

### Motif 13

E-value 3.4e+005

Width 30



Sites 2

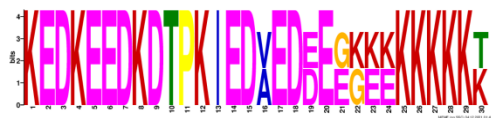

## Motif 14

E-value 1.9e+005

Width 30

Sites 2

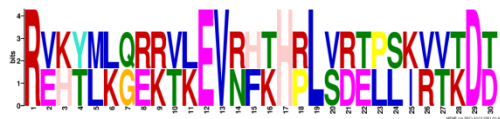

## Motif 15

E-value 3.1e+006

Width 30

Sites 2

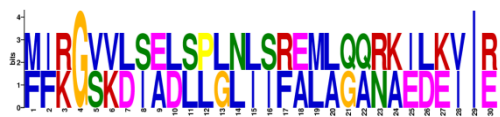

## Motif 16

E-value 3.1e+006

Width 30

Sites 2

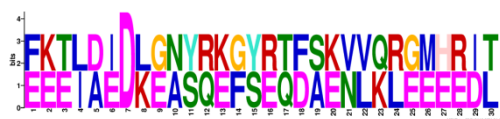

### Motif 17

E-value 3.1e+006

Width 30

Sites 2

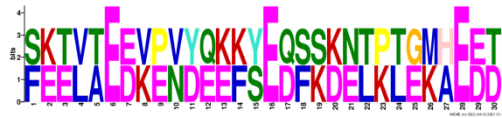

### Motif 18

E-value 3.1e+006

Width 30

Sites 2

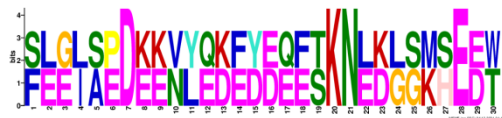

## 6. Sequence logos for the conserved motifs of HSP100s in *Bemisia tabaci*

### BtaHsp100 Motif

#### Motif 1

E-value 1.2e-014

Width 57

Sites 2

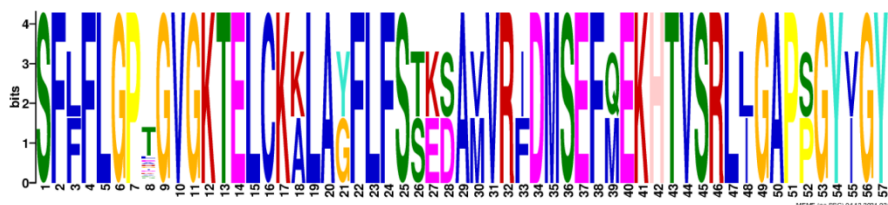

#### Motif 2

E-value 1.7e-006

Width 57

Sites 2

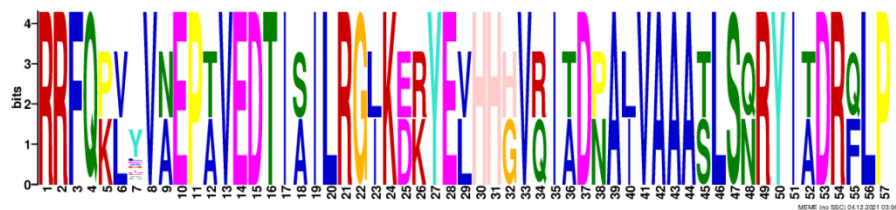

### Motif 3

E-value 1.3e-005

Width 66

Sites 2

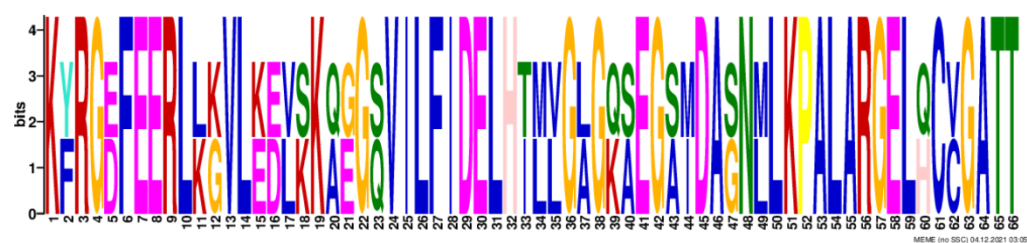

### Motif 4

E-value 3.4e-005

Width 64

Sites 2

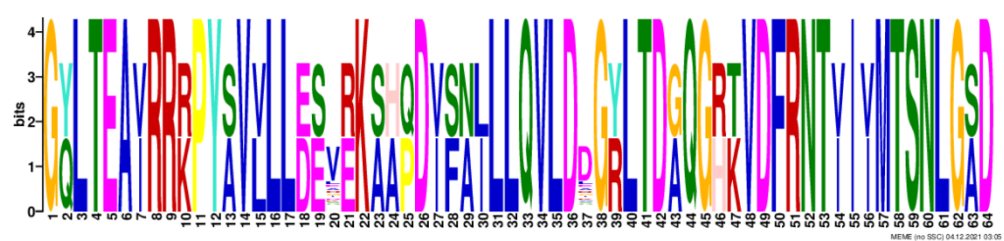

### Motif 5

E-value 5.4e-002

Width 68

Sites 2

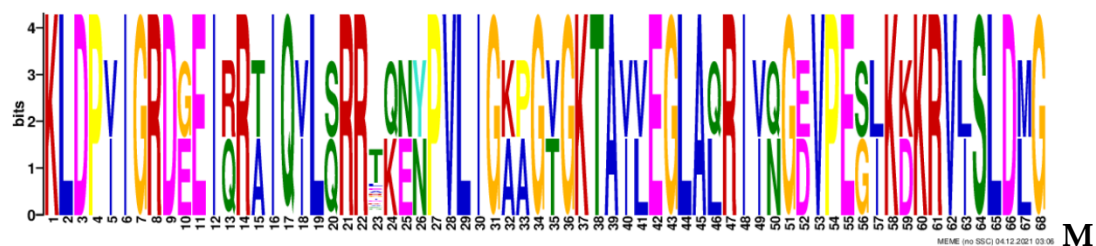

Motif 6

E-value 9.4e-002

Width 70

Sites 2

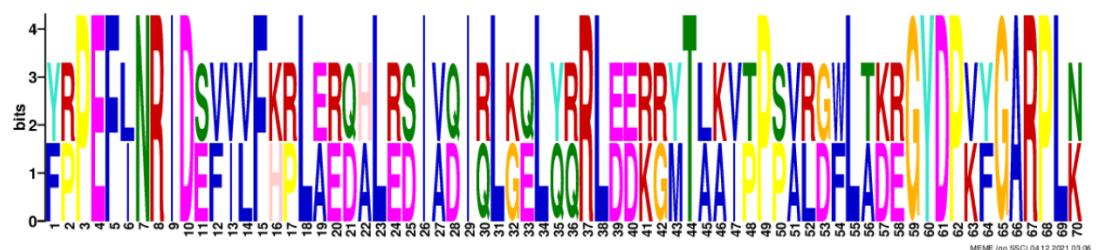

Motif 7

E-value 2.4e-001

Width 56

Sites 2

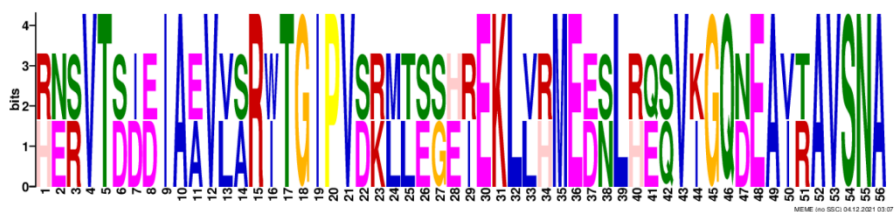

Motif 8

E-value 4.5e+001

Width 53

Sites 2

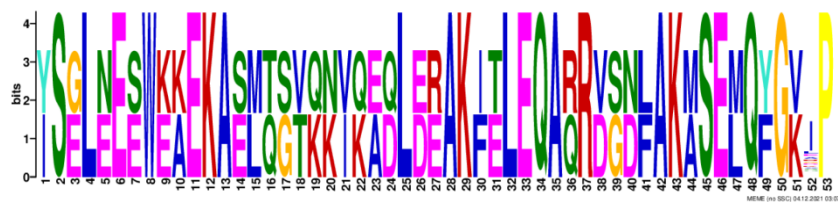

### Motif 9

E-value 4.6e+003

Width 45

Sites 2

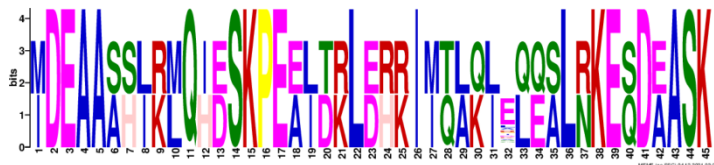

### Motif 10

E-value 3.3e+004

Width 30

Sites 2

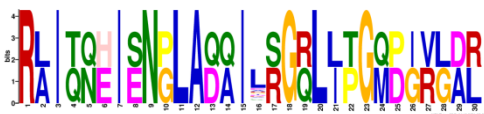

### Motif 11

E-value 1.8e+004

Width 30

Sites 2

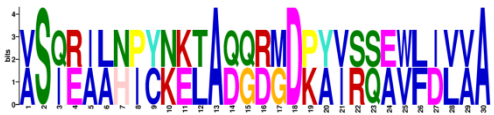

## Motif 12

E-value 5.6e+005

Width 30

Sites 2

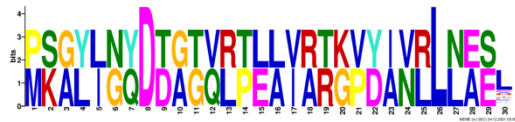

## Motif 13

E-value 5.6e+005

Width 30

Sites 2

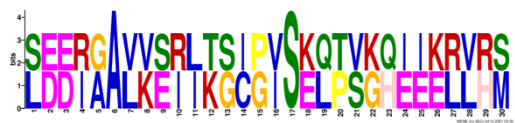

## Motif 14

E-value 5.6e+005

Width 30

Sites 2

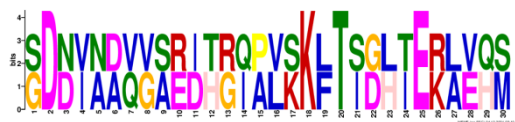

## Supplementary data sheet 2

### Information of *Hsp* sequences in the six surveyed species

#### *Bemisia tabaci*

>BtaHsp70-1

MVKAPAIGIDLGTTYSCVGVWQQGKVEIIANDQGNRTTPSYVAFSDTERL  
IGDAAKNQVAMNPQNTIFDAKRLIGRRYDDPKIQDDMKHWPFKVINDC  
GKPKLQVEFKGETKTFAPEEVSSMVLTKMKETAEEAFLGGQVKDAVITVP  
AYFNDSQRQATKDAGAIAGLNVLRIINEPTAAALAYGLDKNLKGERNVL  
IFDLGGGTFDVSILTIDEGSLFEVRATAGDTHLGGEDFDNRLVNHLAEEFK  
RKYRKDLRGNNRALRRLRTAAERAKRTLSSSTEASIEIDALMDGIDYYTK  
VSRARFEELCSDLFRSTLHPVEKALADAKMDKGSIHVVLVGGSTRIPKIQ  
SLLQNFFCGKTLNLSINPDEAVAYGA AVQAAILSGDTSSAIQDVLLVDVA  
PLSLGIETAGGVMTKIVERNARIPCKQSQTFTTYSNQP AVTIQVYEGERA  
MTKDNLLGTFDLTGIPPAPRGV PKIDVTFDL DANGILNVS AKENSTGKS  
KNIVIKNDKGRLSREEIDRMVNEAEKYKEEDERQRAKIAARNQLESYVFN  
VKQAVDEAGDKLPESDKQLVRDECQAALSWLDNNTLADV EEFNYKLQE  
VQKKCSPIMSKMHGAGQGGMHAWRNGRYARRNGRHAWRIPWRHAR  
TRRTRPNC

>BtaHsp70-2

MNPKNTVFD AKRLIGRRFDDPKIQDDIKHWPFKVISDSGKPKIQVEFKGE  
QKIFAPEEISSMVLTKMKEVAEVYLGKGVSEAVITVPAYFNDSQRQATKD  
AGAIAGMNVLRIINEPTAAALAYGLDKNLKGERNVLIFDLGGGTFDVSIL

SIDEGSLFEVKSTAGDTHLGGEDFDNRLVTHFSEEFKRKYKKDLRGNARA  
LRLRTACERAKRTLSSSTEASLEIDALHEGELCMDLFRNTLAPVERALTD  
AKMDKGSIHVVLVGGSTRIPKVQKMLQDFFCGKSLNLSINPDEAVAYG  
AAVQAAILSGDQSAEIQDVLLVDVTPLSLGIETAGGVMTKIVERNARIPC  
KQTQTFTTYSNQPAVTIQVFEGERSMTRDNNLLGTFNLSGIPPAPRGVP  
KIEVTFDL DANGILNVSAKDNSSGKMERITIKNDKGRLSKEDIEKMLADA  
EKYKHEDEKQKERV TARNQLEGYTFNVKQAVEEAGSKLSETDKKAVLD  
KCSAVLTWLD TNSLAEKEEYEEKL KDLQKDCAPVMTKLHQQGGKGPTV  
EEVD

>BtaHsp70-3

MEVISNEQGNRVTPSYVAFSEVRLIGDTAKMLAPINPKNTIFDVKRLIGRK  
FDDPLVQADMKHWPFTVINDAGNPKVSVEYQGVDKVFAPEEISSMVLSK  
LKETAEVYLN RKVTD AVITVPAYFNDSQRQATKDAGVIAGLNVLQIINEP  
TSAAIAYGLDQNLKSKRNILVFDLGSCTFDVSVLTVDEGSLFEVKSTAGDT  
HLGGEDFDSL LVNYLIEEFKLKHSKDLASNPRALSRLRAAAERAKCTLSS  
APTANIMIDSLFDGIDFYTQVTRPKFEDLCADLFQRTLTTVEQALTDKIE  
REAIDDVVLVGGSTRIPKIQSLLQDFFGGKTLNQSIHPDEAVAYGA AVQA  
ASLSGNDDLKIKDIVLRDVTPLSLGVQMTNDVFSVVIKRNTRIPCKKTQN  
YTPKDN AKGLRFTIYEGERA VASENHLLGEFNLEGIKLAPKFVPSVDVTF  
DLNAEGILLVTAEEKGTDKSENITITNEKGRLTDKDIRRMIQEAKRFKEED  
DKHLARSRARNQLGDYTYKVTQELKAAESKLSKTDKSRLKEESDKTWD  
WLKKNPKAGLGEYKQKLQDIQGKCQSIMKKINKDDALLD



>BtaHsc70-1

MRLFLSGAFCLLACVAFAKEEEKDKEDFGTVVGDLDGTTYSCVGVYKN  
GRVEIANDQGNRITPSYVAFTAAGERLIGDAAKNQLTTNPENTVFDAKR  
LIGRDWNDPTVQQDIKFFPFKVKEKNSKPHIEVSTSQGVKIFAPEEISAMV  
LSKMKETAAYLGKPVVSTNGDTHLGGEDFDQRVMDHFIKLHKKKKGK  
DVRKDNRAVQKLRRVEKAKRALSSAHQVRIEIESFFDGEDFSETLTRAKF  
EELNLDLFQSTLKPVQKVLEDADMNKKDVDE  
IVLVGGSTRIPKVQQLVKEYFNFKEPSRGINPDEAVAYGAAVQAGVLSGE  
QDTDAIVLLDVNPLTLGIETVGGVMTKLIPRNTVIPTKKSQIFSTASDNQH  
TVTIQVYEGERPMTKDNHLLGKFDLTGVPPAPRGVPHIEVTFEIDANGIL  
QVSAEDKGTGNREKIVITNDQNRLTPDDIERMIKEAEKFADDDKKLKERV  
EARNELESYAYSLKNQLADKEKLGSKVDGMILFQLSDEEKT KMEEAIDEK  
IKWLEENQD TDGA EYQKQKKDLEQIVQPIIAKLYAGQGPPPPAGGDSDD  
LKEEL

>BtaHsc70-2

MEGKTPKVIENSEGSRTTPSVVAFSKDGERIVGMPAKRQAVTNSANTFYA  
TKRLIGRRFDDAEVKKDMKTL SYKIVKASNGDAWVQATDGKMYSQIG  
AFVLVKMKETAESYLGTPVKNAVITVPAYFNDSQRQATKDAGQIAGLNV  
LRVINEPTAAALAYGMDKTDDKIIAVYDLGGGTFDISILEIQKGVFEVKST  
NGDTFLGGEDFDNVLVNHLVTEFKKEQGIDVTKDAMAMQRLKEAAEK  
AKIELSSSLQTDINLPYLTMDASGPKHMNLKLTRSKFESLVADLIKRTVAP  
CQKAIQDAEVGKSDISEVLLVGGMTRMPKVQQTVQEIFGRQPSRAVNP

EAVAVGASVQGGVLAGDVTDLVLLDVTPLSLGIETLGGVFTRLISRNTTIP  
TKKSQVFSTAADGQTQVEIKVYQGEREMASNNKLLGQFTLVGIPPAPRG  
VPQIEVTFDIDANGIVHVSARDKGTGKEQQIVIRSSGGLSKDEIENMVKSA  
EEYAQSDKIKKERVEAINQAEGIIHDTESKMTEFKDQLPSEECDKLREQMS  
KVRDILTKGEEADPEEIRTATNELQQASLKL FEMAYKKMAADRDGSSSSS  
SSEEQSSEEKGEEKEKKENKQ

>BtaHsp70-4

MTKIIGIDLGTNSCVAIMENGNNPRVLENSGDRTPPSIIAYTQDGETLVG  
QPAKRQAVTNAKNTFFAIKRLGRKFADQETQRDKDIMPFDIIEADNGD  
AWLSVKGQKTAPPQISAEVLKKMKKTAEAYLGGTVTEAVVTVPAYFND  
AQRQATKDAGRIAGLEIKRIINEPTAAAIAYGLDKATGNRTIAVYDLGGG  
TFDISIIIEIEVKGEKTFEVLATNGDTHLGGEDFDNRLINYLADFEKKEQGF  
DLRKDPLAMQRLKEAAEKAKVELSSAQQTVDNLPYITADAAGPKHMN  
MRVTRAKLESLVEDLVSRSEPLKVALQDAGLSVSDIDDVILVGGQTRMP  
MVQKKVADFFGKEPRKDVNPDEAVAIGA AVQGGVLSGDVKDVLLDVT  
PLSLGIETMGGVMTSLISKNTTIPTKHSQVFSTAEDNQSAVTIHVLQGERK  
RASDNKSLGQFNLDGIQPAPRGTSQIEVTFDIDADGILNVSAKDKN TGRE  
QKITIKASSGLSEAEIEKMVKDAEANSEADRFEDLIQARNQADHLINSTT  
KKLKEAGDKVSPEEKTSIEQALQALET AIKGEDKTDIESKANALTMVSAK  
LEEASQQNSSSNNAEKNDSSDVKADAVDAEFEEVKDKK

>BtaHsp70-5

MIRIIGIDLGTNSCVAVLENGKSRVIENSEGARTTPPSIIAYTDDNEILIGQT

AKRQAVTNPSNTLYAIKRLIGRKFNDDIVQKDIKMVPYKIVSAENGDAW  
VQVKNRKLAPPQISAEILKKMKKTAEDYLGEKITEAVITVPAYFNDSQRQ  
ATKDAGRIAGLNVKRIINEPTAAALAYGMDKNRGDKKIAVYDLGGGTF  
DISII EIADVDGETQFEVMATNGDTFLGGEDFDLKLINYIVKQFKLESGVDL  
SGDSLAMQRLKEAAEKGKIELSSSQQTDINLPYITADKTGPKHLTLKITRA  
KLESLVEDLIKRSLLPCKKAIDDAKLTTKEIDDIILVGGQTRMPLVQKKVA  
EFFGKEARKDVNPDEAVAMGAAIQGGVLGGDVKDVLLLDVTPLTLGIET  
MGGIMTPLIEKNTTIPTKKTQIFSTAEDNQTAVTIHALQGERKKALQNKSL  
GRFDLTDIPPAPRGTPQIEVAFDLDANGILNITAKDKATGKEQSIIKSSGG  
LSEEEINKMIQDAETNKEEDKKFEELVQTRNQADGMIHTIRKTLKEIKNE  
DEKNKLESLINNLEQTLKSDDIKTIKEDLNKLTEEYSTIYQKIYSEKKPQNH  
NSEPAQKNAEKSSSKKEGDVVDAEYEEVNNKTK

>BtaHsp70-6

MSRFTVFGIYVGNTSASIAICKEDGKVEVLANAAGERSTPAVVAVTEKEQI  
VGNAAKSSMITQTNAGTIITNNKLLMDLSLDESDLESITKNPCTIIQKSNH  
VAYEINFGNKTKTFTPAMINTSIYSLLYNIAKSAIHGECDEICCVLVVPTY  
SAESRQYIKQSAIEAGWKVLQIVNQPSVAPLAYHSFKEASPETKYICVYRV  
GGVSCDAAILRLRNGFIQILASETNFDIGGHELVSCLIQCFCCEEMKRKYKV  
DPNESKRSIRKLRSAAETCIKVLSTLSSASVSVDLSLFEGIDFNYQMSRARFES  
LIPSLFGPLDAPINDALQSAQLQATDINEVILCGEPLKTPRLQSHVKSLFPN  
AEVLSSINPDEVLARGAARQAGFITEFCDLHKSIPVPTDVTFITEPITVQIQ  
SSNNEEIVFEKFSSLPISKTVHLKDNKSEIIVTAAQSCSAESKLNGKINAEQ

AIEIHLLNKEMEELQMYTMDLVAGVFLFVPQIDGLSRKPRTSIAMFQNFST  
YFIFS

>BtaHsp105/110

MDWRKYLLAILLSVAFVAVHVSGLAVMSIDLGSEWMKVAIVSPGVPMEV  
ALNKESKRKTPAAISFRNEERTFGDDALNVAVRFPDLSYHYLLDLLGKSID  
NPVVQLYKKRFPFYNLEADPNRSTVLFKHPSGKSYSPEELVGQLLYKAQE  
YAQNSANQVVTEVVLTVPGFFNDFERRSLITAAELAGLKVLQLINDYSAV  
ALNYGIFRRKEFADSAQYVMFFDMGASSTTATIVQYQTVKVKDRGIVETL  
PQASVIGVGFDRTLGGLEMTLRLRDYLAQK

FNEMKKTDIDVTQNPRAMAKLFKEAGRVKTVLSANADHFAQIEGLLEGI  
DFRLKVTREEFEKLCADLFDRVKAPVEKALKMSGLTTDILNAVVLVGAG  
TRVPAVQDRLSAAVKRDLARNLNTDEAAVMGAVYRAADLSTGFKVQK  
FLVKDAVIYPIQVHFDRDGDASSKQVRRTLFGAMNPYPQKKVLTLYKHT  
EDFSFHVNYADLDHLDPF AVEALGSLNLTKVNLKGVPEALAKFSTEGHE  
LKGIAHFHMDDSGILSLPNVELVAEKTISAEESPLSKLGSTISKLFSGSEN  
SKDNPDVRPVTEEAENEKENKTEQAKEKPESKEPPADGAKKNDTEKE  
KKDAKDETPKKPKIVTLKEPIKAEIEDLGIPVLSGDAYKATSELIEAYNKA  
LEKAHQEKALNLLES AVISYKQKLQDDEFVSFANTDEV D KIKARSNELSE  
WLDEEGYSADTKTLTKKLDEFDTLVKPVLEKKKNHETTPEALEKLENAIN  
KTNTFTTAIRNMTATAEGDLPPFYSETEMDGIDKLITDIQKWRDDTVEQQ  
SKLARSDPPVLVT

RTIFEKIQLIETETRILINKVKLWDQAMKAKSAQDATKNDTKKDKAGKKR

SKSKQTEGEQAKSEKGTADKEAGESVPETEPQVETPAESEPEQPLQEQPEK  
VAEPSTPEAESSPSTPDS DPPKHAE L

>BtaHsp70-7

MAAMSVIGIDFGNESC YVAVARAGGIETIANDYSLRATPSCVAFSEKTRIL  
GVA AKNQLVTNMKNTVYGFKRLLGRQYKDPFIQKDLQSLTYQTVETPSG  
GVGIKVNYLNEPHVFHPEQITAMLLTKLKAISEEALNTKINDCVISVPSYF  
TNTERKALLNAASIAGLNVLR LFNETTATALAYGIYKQDLPPPEEKPRNV  
VFVDCGYSSLQVSACAFHKGK LKMLACAADPDLGGHSFDVILAEHLSKD  
LKARYNINPMTNARAYTRLLTEVDKLKKQMSANSTKLPLNIECFMEDKD  
VHCDMKRADMEELCAGLFQRVEKTLRQCLED SKLKLEDIHAVEIVGGSS  
RVPAIKQLIEVVFNKPASTTLNQDEAVARGCALQCAMLSPAVRVRDFAV  
TDIQMYPVHINWDGHDAQDQ GEME VF SKNHAAPFSKVLTLYKKESFNL  
KAFYPPNSVPYPDPRI GEYCIKNIKPTAQGGTQKVKLKIRINIHGIVSVSSAS  
LIEQIKGSAEPM DVEVN EEEHKEKEQPAQETTQEQQQPPEANANSQDAQ  
PNGPAEDDDAEKKEKKRKT VKSVDLPIEEFLPGFSSEVSSFFEAEGQMM  
AADRQEKDRVDARNSLEEYVYELRGKLSEELSAYVVEKDRSSLVEQLDQ  
MENWLYEEGEECVKQVYMDKLGSLRRKMEYE ARP KALEELSVAIQLAFK  
NLEQYKAREDKLKNLDPATVEKSEQNIRNLHHWCEEKRAILSATPLHQN  
PPVSVAEILAEKEKAVSEIKLLSTMPKV APEPAKQQPPPEQSQESTQDEKM  
KTENGEQD

>BtaHsp67B2

MQANLFRRFLPALVSCSSIKRG TFLTLKQENLNFAYNTRVQLFQSSVPMS

ACKNVGFAEFKELLENPQNIVIDVREKQELVDDGRIEKTHNIPLGEVTQA  
LQLEPSAFEAKYGFPKPSPDSNLIFSCRSGKRSLNACGIAEKQGFKNLWNY  
SGGFLDWSEQTKGK

>BtaHsp60

MAAKDLKFGNDARKKMLKGVNLANAVKVTLGPKGRNVVLDKSYGAP  
SITKDGVSVAREIELEDKFENMGAQMVKEVASKANDAAGDGTTTATVL  
AQSIVTEGLKAVAAGMNPMDLKRIGDKAVEAAVEELKIISKPCKDSKEIA  
QVGTISANADAKVGKLISDAMKRVTNEGVITVEEASGLEDDLIVVEGMQ  
FDRGYLSPYFINKQESSIEFDNPYILLVDKKISNIRDMLSILEVVAKEGKPL  
LIIAEDVEGEALATLVVNTMRGIVKVS AVKAPG  
FGDRRKEMLQDIAVLTHGHVISEETGDSLEKATKENLGNAKRVVITKDA  
TTIIDGAGEKSKIEARIQNIKKQIENATSDYDKEKLQERVAKLSGGVAVIK  
VGAPTEIAMKEKKARVEDALQATRAAVEEGVVPGGGVALIRVASKIANS  
SLKGDNEDQNVGIRVALRAMESPLRQIVVNAGEEASVIANKIKENKGND  
NYGYNAQTEAYGDMIEMGILDPTKVTRSALQYAASIAGLMITTECMVTD  
LPKEEKASDMGAGGMGGIGGMGGMNGMM

>BtaHsp90A1

MQDQETRQFQSEVKQLLSLMIHSLYSNKEIFLRELISNASDAADKLRFRAL  
SSPELYEGEAELRVRLSFDKDKRTLTLSDNGIGMTRDEVIDNLGTIAKSGT  
KAFLDSLGSQSKDSQLIGQFGVGFYSAFIVSDTVTVRTRGAGVASELGVF  
WESKGECDYNLATITKEDRGTEITLHLKEGEDEFNDWRLRSISKYS DHIS  
LPVELECKNKDENQEGSETEKNNLPDKTQTVVTWEKINKAQALWTRPK

SDITDDEYKAFYKHITHDFTDPLNWSHNKVEGRQEYTSLLYIPAQAPWD  
MWNRDHKHGLKLYVQRMFIMDDAEQFMPNYLRFIRGLIDSNDLPLNISR  
EILQDNRVQTQNLKSALTKRALQMLEKLSTEDSEKYQQFWQQFGMALKE  
GPAEDFVNKEAVAKLLRFASHTDSSLQSVSLEDYLGRMNNEGQEKIYFIT  
ADSYAAAKNSPHLELFRKKGIEVLLLSDRIDEWMMSKSFQSISKSDESLNK  
LADEDHHGEQKEAEQALQPFIERVKTLLGERVKEVRFTHRLSDTPSIVTT  
DTDEMSTQMAKLLAAAGQKAPEVKYIFELNPNHLLVKRASEVSDDTLFA  
QWINLLLDQALLTERGTLDDPNQFLRAVNELLMA

>BtaHsp90A2

MFRGSKLIALSLGLLIFALAGARAEDIIIEKTIDIDLGASREGSRTDAEVV  
QREEERILIDGLNVAQLRELKEKA EKQTFQAEVNRMMKLIINSLYRNKEIF  
LRELISNASDALDKIRLLSLTDPGVLDTNSELAIRIKADKDNKVLHITDTGI  
GMTKGDLVKNLGTIAKSGTAEFLSQMNEKSEVKQDLNDMIGQFGVGFYS  
AFLVADKVFVTTKHNEQQYIWESDASSFTIAEDPRGTTLKRGTTISLQLK  
DEAADFVEIDTLKNLIRKYSQFINFPYIWSSKTVTEEVVPVDEEKSEDSKDET  
PTEKAEEDVEVEESKDEEPPKTKKVEKTVWDWELLNDHKPIWTRKPNEIE  
DAEYNEFYKSMTKDKNDPLAKTHFVAEGEVTFKSLLFVPNAQPADSFNK  
YGTVSDNIKLYVRRVFITDEFTDLLPRYLNFLRGVVDSDDLPLNVSRETLQ  
QHKLLKVIRKKLVRKALDMIKKLDPETYKKFYQEYSTNVKLGIVEDPANR  
VRLAKLLRFYSSNQSGLTSLADYVTRMKPKQDHIYFIAGTSRDEVEKSPFV  
ERLISKGYEVLYLIEAIDEYAVSSLPEFEGKKFQNVAKEGLTLDNPEKLKEV  
SEQFEPLTKWLSENALKGKISKAVLSERLVDTPCALVAGMFGWTGNMER

LALSNAHQKSDDPQREHYMKQRKTLEVNHHKHLVRELLKRVKDDPEDE  
KAKDIALMMFRTATLRSGFMLQDSAFAQSVELLMRQSLGISPDEKVL  
EDDEETKNEDGSKSEEWL

>BtaHsp90A3

MTELSPLIRNGIGMTKADLVNNLGTIAKSGTKAFMEALAAGADISMIGQ  
FGVGFYSAFLVADTVTVVSKHNDDEQYVWESSAGGSFTIKSDHGEPLGR  
GTKIIMHMKEDMTEFLEERKIKDIVKKHSQFIGYPIKLLVEKERDKELSEDE  
EEEEVKKEDKEDKEEDKDTPKIEDVEDEEEGKEKKKKKKKTIKEKYTEDEEL  
NKTKPIWTRNPDDITTEEYGEFYKSLTNDWEDHLAVKHFSVEGQLEFKAL  
LFVPRRAPFDLFENKKKKNNIKLYVRRVFIMDNCEDLIPEYLNFIKGVVDS  
EDLPLNISREMLQQNKILKVIRKNLVKKCLELFEELAEDKENFKKFYEQFS  
KNLKLGIHEDTQNRKKLADLLRYQTSATGDDVCSFKDYVARMKENQKH  
IYYITGESKDQVANSSFVERVKKRGFEVIYMTEPIDEYVVQQMKDYDGKN  
LVSVTKEGLELPEDEEEKKKYEEDKVKFETLCKVMKDILDKKVEKVIVSN  
RLVESPCCIVTSQYGWTANMERIMKAQALRDSSTMGYMAAKKHLEINP  
DHPVMDALRVKAEAEKNDKSVKDLVMLLFETALLSSGFALED PQVHAG  
RIHRMIKLGLGIDEDEPVMVEEEKPDTAMPAADGDAEDASRMEEVD

>BtaHsp90A4

MSSWCTLGLFRSRSEMPEDATMEQAETFVFQAEIAQLMSLIVNTFYSNKEI  
FLRELISNSSDALDKIRYESLTDPSRLESGKELFIKIIPNKNNDNTLTLIDSGIG  
MTKADLVNNLGTIAKSGTKAFMEALAAGADISMIGQFGVGFYSAFLVAD  
TVTVVSKHNDDEQYIWESSAGGSFTIRPDHSEPLGRGTKIIMHMKEDMTE



FLEERKIKEIVKKHSQFIGYPIKLLVEKERDKELSEDEEEEEEEKKEDKEEDK  
DTPKIEDAEDDEGKEKKKKKKKTIKEKYTEDEELNKTPIWTRNPDDITTEE  
YGEFYKSLTNDWEDHLAVKHFSVEGQLEFKALLFVPKRAPFDLFENKKK  
KNNIKLYVRRVFIMDNCEDLIPEYLNFIKGVVDSEDLPLNISREMLQQNKI  
LKVIRKNLVKKCLELFEELAEDKENYQKFYEQFSKNLKLGMHEDTQNRK  
KLSDLLRYQTSASGDESSLKDYVARMKENQKHIIYITGESKDQVANSSF  
VERVKKRGFEVVYMTEPIDEYVVQQLKDYDGKNLVSVTKEGLELPEDEEE  
KKKFEEDKVKFETLCKVMKDILDKKVEKVVSNNRLVESPCCIVTSQYGWT  
ANMERIMKAQALRDSSTMGYMAAKKHLEINPDHAVIDALRVKAEAEK  
NDKSVKDLVMLLFETALLSSGFALED PQVHAARIHRMIKLGLGIDEDET  
HVEEEKPDAAMPAADGDAEDASRMEEVD

>BtaHsp100

MKALLNQDTGTVRPLL VATGVDINRLNAELDKALSDLPVVEGIGGDVRL  
SNASIRILNICNKLAQQRGDKYISSEWFILAALEERGALKEILKSCGISEQP  
KQEIERLRSGDNVNDQGAEDHRQALKKFTIDLTERAEQSKLDPVIGRDEE  
IRRAIQVLQRRTKNNPVLIGAPGVGKTAIVEGLAQRIVNGEVPEGLKKKR  
VLSLDMGALLAGAKYRGEFEERLKGVLKDLSKQGGSVILFIDELHTMVG  
AGKAEGAMDAGNMLKPALARGELHCVGATTLD EYRQYIEKDPALERRF  
QKVYVAEPTVEDTIAILRGLKERYELHHHVQITDPAIVAAASLSQRYADR  
QLPDKAIDLIDEAAASIRMQIDSKPEALDKLERRIIQLKLEQQALNKEQDE  
ASKKRLKMLNDELEKKERQYSELEEEWKA EKASLTGTQNIKAQLEEAKIT  
LEQARRVSDLAKMSEM QYGKIPALEKQLQAATEKEMSSMKLLRNRVTDI

EIAEVLARWTGIPVDRMLESEREKLLRMEENLHQQVIGQNEAVTAVSNA  
LRRSRAGLSDPNRPIGSFLFLGPTGVGKTELCKALAYFLFSSKDAMVRIDM  
SEFMEKHTVSRLLGAPPGYVGYEEGGYLTEAVRRRPYSVLLDEVEKAHQ  
DVFNILLQVLDDGRLTDGQGRTVDFRNTVIIMTSNLGSDLIQGRFSQADY  
SDMKKSVM EVVQRYFRPEFINRIDEVVVFHPLEEQHLESIAQIQLKQLYQR  
LEEKGYTAKITPSALGFLTKEGYDPVYGARPLKRAIQQEIENPLAQQILSG  
QLIPGMPIVLDLNEGHLARQ

>BtaHsp23.8

MADGIKRDIPIRLGDFSVIDSEFSNIRERFDAEMKKMEDEMTKFRSELMNR  
ESNFFKTTTRIVTKKTRDKKLIGSAFLCCSSTNSITSNSNNTLSEPKNLW  
LESINSPLIQEDGDNKMLKLRFDVSQYQPEEIIVKTVDNKLLVHAKHEEKT  
DSKSVYREYNREFLLPKGTPESIKSSLSKDGVLTV EAPLPALGAPEKLVPI  
AHH

>BtaHsp40-1

MDLMKNLKL PALQLWYFLFCLSLMVVCLTEDDYEV LNVKKNASEKEI  
KKAFRHLAKRWHPDKNKEEGAEQKFQKIAQAYEVLSDPDKRKQYDQFG  
SASFETGGQPRHHTFNFD DIFSAFDDDFGSGQTFFFSSHGNGGGGSFHHH  
GHAEKHRQHFSFDDFFNEGMFDQFHMQDQE QFGDGGSF FGGHFGGGG  
GNHHHHHHHQAHHQAHHQAHHHAQQFHHPHESSGGYQRTCRTITQR  
VGNTVATYKQCS

>BtaHsp40-2

MASAGKLLKLFPR TSSNYLFSFNPIANIKYLFVFQHQRSLFHTSSRLMKRD

YYEVLGISKNASAKEVKRAYYELAKKYHPDSNKSDPNASKKFQEATEAY  
EVLSDDTKRKQYDQWGSTSEQMGGPGPGAGAGAGNFNNSWNFSSMNPE  
DIFRKIFGDQFRGDEDFGDSDSDFGVNTAQEIIMKLTF AQSVRGCNKDIVL  
NVTDTCPRCQGKRSEPGTKPVKCTQCNGTGMEVVNSGPFMVRSTCRRC  
HGAKVHNYPYCTECEGKGTVNQRRKITVPVPAGVDDGQTVRMVVGRK  
ELFITFRIERSDYFRREGADIYTDAVISISQAVLGGNIRVRGVYEDQNILIAP  
GTSSHTKVRLSGKGLKKVNVNGYGDHYINLRVQAPKRLSDKQKALMQA  
YAELEDTTEGTVHGFVITKDGGKQCWDSSLFQEILVQSFQIKWSPIAKRKI  
KLTF

>BtaHsp40-3

MGKDYYSILGISKGASDDEIKKAYRKLALKYHPDKNKAKSAEEKFKEVAE  
AYEVLSDKKKRDIYDKFGEDGLKGNVGGGGGQGGPGNFQYTFHGDPQ  
ATFAQFFGTSNPFQFFDLGGGGTRMFFGGDDDDDDPFFSTGGLHRSGPG  
GGAFRSQSFNIHGSPHRDKDKQQDSPIEHDLYVSLEDILKGCTKKMKISRR  
VLQPDGTSKKEDKVL TINVKPGWKAGTKITFQKEGDQVRNKIPADIVFIIR  
DKTHPLFKREGSDIRYTAKITLKQALCGTNIEIPTLDNYKVPLQLTHKIIKP  
TTVERIPGKGLPFPKEPSRRGDLLVSFDIKFPETISPSAKELLNDILPNS

>BtaHsp40-4

MVVETTFYDILGVKPN CNPDELKKAYRKLALKYHPDKNPNEGEKFKQIS  
QAYEVL SNPEKRS LYDRGGEQALKEGGIGGGGFTSPMDIFETIFGTSRSG  
PARGKDVHHQLSVTLEELYKG CERKLSLEKNIICEDCKGRGGKKGANEE  
VCSPCRGTGRITEILQLRPGMIQQSQSICGECRGQGRKF SHKDMCRTC MG

RKLVTRTRQIIKINIEKGMVDNQKIVLSGEGDQAPGLEAGDVVILDEKKH  
DVFKRNGSNLIMMMHISLVESLCGFQKVIHTLDDRDLVITAIPGEVTKHG  
EVK CIMGEGMPQYKNPFEEKGQLIVQFLVDFPDSIAADKIAKLEACLPPRP  
EVIIPDDAEECTLLPMDPNADARRQDSRNAYDEDEAHDGQGFRMQCA  
SQ

>WangBtHsp90A1

MPEDATMEQAETFVFQAEIAQLMSLIVNTFYSNKEIFLRELISNSSDALDKI  
RYESLTDPSRLESGKELFIKIIPNKNNDNTLTLIDSGIGMTKADLVNNLGTIA  
KSGTKAFMEALAAGADISMIGQFGVGFYSAFLVADTVTVVSKHNDDEQY  
IWESSAGGSFTIRPDHSEPLGRGTKIIMHMKEDMTEFLEERKIKEIVKKHSQ  
FIGYPIKLLVEKERDKELSEDEEEEEKKEDKEEDKDTPKIEDAEDDEGKEK  
KKKKKTIKEKYTEDEELNKTPIWTRNPDDITTEEYGEFYKSLTNDWEDH  
LAVKHFSVEGQLEFKALLFVPKRAPFDLFENKKKKNNIKLYVRRVFIMDN  
CEDLIPEYLNFIKGVVDSIDLPLNISREMLQQNKILKVIRKNLVKKCLELFE  
ELAEDKENYQKFYEQFSKNLKLGMHEDTQNRKKLSDLLRYQTSASGDES  
SSLKDYVARMKENQKHIYYITGESKDQVANSSFVERVKKRGFEVVMTEP  
IDEYVVQQLKDYDGKNLVSVTKEGLELPEDEEEKKKFEEDKVVFETLCKV  
MKDILDKKVEKVVVSNRLVESPCCIVTSQYGWTANMERIMKAQALRDSS  
TMGYMAAKKHLEINPDHAVIDALRVKAEAEKNDKSVKDLVMLLFETAL  
LSSGFALED PQVHAARIHRMIKLGLGIDEDET VHVEEEKPDAAMPAADG  
DAEDASRMEEVD

>WangBtHsp90A2

MPEDVNMEQAETFVFQAEIAQLMSLIVNTFYSNKEIFLRELISNSSDALDK  
IRYESLTDPSRLESGKELYIKIIPNKNDRTLTIIDTGIGMTKADLVNNLGTIA  
KSGTKAFMEALAAGADISMIGQFGVGFYSAFLVADTVTVVSKHNDDEQY  
VWESSAGGSFTIKSDHGEPLGRGTKIIMHMKEDMTEFLEERKIKDIVKKHS  
QFIGYPIKLLVEKERDKELSEDEEEEEVKKEDKEEKEEDKDTPKIEDVEDEE  
EGKEKKKKKKTIKEKYTEDEELNKTPIWTRNPDDITTEEYGEFYKSLTND  
WEDHLAVKHFSVEGQLEFKALLFVPRRAPFDLFENKKKKNNIKLYVRRV  
FIMDNCEDLIPEYLNFIKGVVDSEDLPLNISREMLQQNKILKVIRKNLVKK  
CLELFEELAEDKENFKKFYEQFSKNLKLGIHEDTQNRKKLADLLRYQ TSA  
TGDDVCSFKDYVARMKENQKHIYYITGESKDQVANSSFVERVKKRGFEVI  
YMTEPIDEYVVQQMKDYDGKNLVSVTKEGLELPEDEEEKKKYEEKVKF  
ETLCKVMKDILDKKVEKVIVSNRLVESPCCIVTSQYGWTANMERIMKAQ  
ALRDSSTMGYMAAKKHLEINPDHPVMDALRVKAEAEKNDKSVKDLVM  
LLFETALLSSGFALED PQVHAGRIHRMIKLG LGIDEDEPVMVEEEKPD TA  
MPAADGDAEDASRMEEVD

>WangBtHsp90B1

MFRGSKLIALSLGLLIFALAGARAED EIIIEKTIDIDL GASREGSRTDAEVV  
QREEERILIDGLNVAQLRELKEKA EKQTFQAEVNRMMKLIINSLYRNKEIF  
LRELISNASDALDKIRLLSLTDPGVLD TNSELAIRIKADKDNKVLHITDTGI  
GMTKGDLVKNLGTIAKSGTAEFLSQMNEKSEVKQDLNDMIGQFGVGFYS  
AFLVADKV FVTTKHNEDQQYIWESDASSFTIAEDPRGTTLKR GTTISLQLK  
DEAADFVEIDTLKNLIRKYSQFINFPYIWSSKTVTEEVPVDEEKSEDSKDET

PTEKAEEDVEVEESKDEEPPKTKKVEKTVWDWELLNDHKPIWTRKPNEIE  
DAEYNEFYKSMTKDKNDPLAKTHFVAEGEVTFKSLLFVPNAQPADSFNK  
YGTVSDNIKLYVRRVFITDEFTDLLPRYLNFLRGVVDSDDLPLNVSRETLQ  
QHKLLKVIRKKLVRKALDMIKKLDPETYKKFYQEYSTNVKLGIVEDPANR  
VRLAKLLRFYSSNQSGLTSLADYVTRMKPKQDHIYFIAGTSRDEVEKSPFV  
ERLISKGYEVLYLIEAIDEYAVSSLPEFEGKKFQNVAKEGLTLDNPEKLKEV  
SEQFEPLTKWLSENALKGKISKAVLSERLVDTPCALVAGMFGWTGNMER  
LALSNAHQKSDDPQREHYMKQRKTLEVNHKHPLVRELLKRVKDDPEDE  
KAKDIALMMFRTATLRSGFMLQDSAEFAQSVELLMRQSLGISPDEKVLED  
EDDEETKNEDGSKSEDGSEDQDEADSTDDHEHEEL

>WangBtHsp70-1

MAAMSVIGIDFGNESCIVAVARAGGIETIANDYSLRATPSCVAFSEKTRIL  
GVAANKQLVTNMKNTVYGFKRLLGRQYKDPFIQKDLQSLTYQTVETPSG  
GVGIKVNYLNEPHVFHPEQITAMLLTKLKAISEEALNTKINDCVISVPSYF  
TNTERKALLNAASIAGLNVLRLENETTATALAYGIYKQDLPPPEEKPRNV  
VFVDCGYSSLQVSACAFHKGKLMACAAADPDLGGHSFDVILAEHLSKD  
LKARYNINPMTNARAYTRLLTEVDKLKKQMSANSTKLPLNIECFMEDKD  
VHCDMKRADMEELCAGLFQRVEKTLRQCLED SKLKLEDIHAVEIVGGSS  
RVPAIKQLIEVVFNKPASTTLNQDEAVARGCALQCAMLSPAVRVRDFAV  
TDIQMYPVHINWDGHDAQDQGEMEVSFKNHAAPFSKVLTLTKKESFNL  
KAFYPPNSVPYPDPRIGEYCIKNIKPTAQGGTQKVKLKIRINIHGIVSVSSAS  
LIEQIKGSAEPM DVEVN EEEHKEKEQPAQETTQEQQQPPEANANSQDAQ

PNGPAEDDDAEKKEKKRKT VKSVDLPIEEFLPGFSSEVSSFFEAEQGMM  
AADRQEKDRVDARN SLEEVYELRGKLSEELSAYVVEKDRSSLVEQLDQ  
MENWLYEEGEECVKQVYMDKLGSLRSIGDAIYQRKMEYEARPKALEELS  
VAIQLAFKNLEQYKAREDKLKNLDPATVEKSEQNIRNLHHWCEEKRAIL  
SATPLHQNPVSVAEILAEKEKAVSEIKLLSTMPKVAPEPAKQQPPPEQSQ  
ESTQDEKMKTENGEQD

>WangBtHsc70-1

MRLFLSGAFCLLACVAFAKEEKKDKEDFGTVVGIDLGTTYSCVGVYKN  
GRVEIANDQGNRITPSYVAFTAAGERLIGDAAKNQLTTNPENTVFDAKR  
LIGRDWNDPTVQQDIKFFPFKVKEKNSKPHIEVSTSQGVKIFAPEEISAMV  
LSKMKETA EAYLGKPVTHAVVTVPAYFNDAQRQATKDAGAIAGLVVM  
RIINEPTAAAIAYGLDKKEGEKNVLVFDLGGGTFDVSLLTIDNGVFEVVST  
NGDTHLGGEDFDQRVMDHFIKLHKKKKGKDVRKDNRAVQKLRREVEK  
AKRALSSAHQVRIEIESFFDGEDFSETLTRAKFEELNLDLFQSTLKPVQKVL  
EDADMNKKDVDEIVLVGGSTRIPKVQQLVKEYFNFKEPSRGINPDEAVA  
YGAAVQAGVLSGEQD TDAIVLLDVNPLTLGIETVGGVMTKLIPRNTVIPT  
KKSQIFSTASDNQHTVTIQVYEGERPMTKDNHLLGKFDLTGVPPAPRGVP  
HIEVTFEIDANGILQVSAEDKGTGNREKIVITNDQNRLTPDDIERMIKEAE  
KFADDDKKLKERVEARNELESYAYSLKNQLADKEKLGSKLSDEEKTME  
EAIDEKIKWLEENQD TDGA EYQKQKKDLEQIVQPIIAKLYAGQGPPPPAG  
GDSDDLKEEL

>WangBtHsp70-2

MPGKTPAIGIDLGTITYSCVGVWQQGKVEILANDQGNRTTPSYVAFTDTER  
LIGDAAKNQVAMNPKN TVFDAKRLIGRKFD DPKIQADMKHWPFTVVN  
DCSKPKIQVEFKGETKRFAPEEISSMVLTKMKETA EAYLGGKVRDAVITVP  
AYFNDSQRQATKDAGAIAGLNV LRIINEPTAAALAYGLDKNLKGERNVL  
IFDLGGGTFDVSILTIDEGSLFEVRSTAGDTHLGGEDFDNRLVNH FVEEFK  
RKYRKDLRTNPRALRRLRTAAERAKRTLSSSTEASIEIDALMDGIDYYTKV  
SRARFEELCADLFRSTLHPVEKALNDANMDKGSIH DVVLVGGSTRIPKVQ  
SLLQNFFGGKTLNFSINPDEAVAYGA AVQAAILSGDTSSAIQDVLLVDVA  
PLSLGIETAGGVMTKIVERNARIPCKQSQTFTTYADNQP AVTIQVYEGERA  
MTKDNLLGRFDLTGIPPAPRGV PKIDVTFDL DANGILNVSAKENSTGRE  
RNIVIKNDKGRLSREEIDRMVNEAEQYKEEDDKQRARVAARNQLESYIFN  
VKQAAEEAGDKLSAADKQSILED CQAALQWLDNNTLADVEEFNYKLQE  
LQKKCSPIMSKMHQSSQNSQGMPGKGGMPGHGMPGPGGMP SYGMPG  
QGGMP SYGMPGQGGMP SYGMPGQGGMP SYGMPGQSRTPGYGGYHQN  
TSGGPTIEEVD

>WangBtHsp70-3

MSRFTVFGIYVGNTSASIAICKEDGKVEVLANAAGERSTPAVVAVTEKEQI  
VGNAAKSSMITQTNAGTIITNNKLLMDLSLDESDLESIIAKNPCTIIQKSN  
HVAYEINFGNKTKTFTPAMINTSIYSLLYNIAKSAIHGECDEICCVLVVPTY  
YSAESRQYIKQSAVEAGWKVLQIVNQPSVAPLAYHSFKEASPETKYICVYR  
VGGVSCDAAILRLRNGFIQILASETNFDIGGHELVSKLIQCFCEEMKRKYK  
VDPNESKRSIRKLRSAAETCIKVLSTLSSASVSVD SLFEGIDFNYQMSRARF



ESLIPSLFGPLDAPINDALQSAQLQATDINEVILCGEPLKTPRLQSHVKSLE  
PNAEVLSSINPDEVLARGAARQAGFITEFCDLHKSIPEPVTDVTFITEPITV  
QIQSSNNEEIVFEKFSSLPISKTVHLKDNKSEIIVTAAQSCSAESKLNGKVTI  
PSSKDSSDLYLDVEINAEQAIEIHLNKEEMEELQMYTMDLVAVPAS

>WangBtHsc70-2

MAKAPAIGIDLGTITYSCVGVFQYGKVEIANDQGNRTTPSYVAFTDTERLI  
GDAAKNQVAMNPNTIFDAKRLIGRRFDDATVQADMKHWPFVINDN  
TKPKIQVEYKGEAKQFFPEEISSMVLKMKETAAYLGKTVTNAVITVPAY  
FNDSQRQATKDSGAIAGLNVLRIINEPTAAAIAYGLDKKASGSGERNVLIF  
DLGGGTFDVSILTIEDGIFEVKSTAGDTHLGGEDFDNRMVNHFAQEFKRK  
YKKDLTTNKRALRRLRTACEKAKRILSSSSQTSIEIDSLFEGIDFYTSITRARF  
EELNADLFRSTMEPVEKSLRDAKMDKAQIHDIVLVGGSTRIPRVQKLLQD  
FFNGKELNKSINPDEAVAYGAAVQAAILHGDKSEEVQDLLLLDVTPSLG  
IETAGGVMTVLIKRNTTIPTKQTQTFTTYSNQPVGVLIQVYEGERTMTKD  
NNLLGKFELTGIPPAPRGVPQIEVTFDIDANGILNVTAEKSTGKENKITIT  
NDKGRLSKEDIEKMVSDAEKYKHEDEKQRQVIAAKNSLESYCFNMKSTM  
EDDKLKDKISESDKTAIMEKCNVIRWLDNQLADKEEFEHKQKELEALC  
NPIITKLYQGAGGAEGMPGFPGGMPGAPGAGGAGAAAGGPTIEEVD

>WangBtHsp70-4

MAKAPAVGIDLGTITYSCVGVWQQGKVEIANDQGNRTTPSYVAFSDTER  
LIGDAAKNQVAMNPQNTIFDAKRLIGRRFDDPKIQADMKHWPFKVIND  
CGKPKLQVEFKGETKTFAPEEVSSMVLTKMKETAEAFLGTKVKDAVITVP

AYFNDSQRQATKDAGAIAGLNVLRINEPTAAALAYGLDKNLKGERNVL  
IFDLGGGTFDVSILTIDEGSLFEVRATAGDTHLGGEDFDNRLVNHLEEFK  
RKYRKDLRGNNRALRRLRTSAERAKRTLSSSTEASIEIDALMDGIDFYTKV  
SRARFEELCSDLFRSTLHPVEKALADAKMDKSSIHDVVLVGGSTRIPKIQS  
LLQNFFCGKALNFSINPDEAVAYGA AVQAAILSGDTSSAIQDVLLVDVAP  
LSLGIETAGGVMTKIVERNARIPCKQSQTFTTYSNQP AVTIQVYEGERA  
MTKDNLLGTFDLTGIPPAPRGV PKIDVTFDL DANGILNVS AKENSTGKS  
KNIVIKNDKGRLSREEIDRMVNEAEKYKEEDEKQRAKIAARNQLESYVFN  
VKQAVDEAGDKLPESDKQLVHDECQAALSWLDNNTLADVEEFNYKLQ  
EVQKKCSPIMSKMHGAGQGGMPGGMGGMPGGMGGMPGGMGGMPGY  
GGQGPTVEEVD

>WangBtHsp70-5

MPGKTPAIGIDL GTTYSCVGVWQQGKVEIIANDQGNRTTPSYVAFTDTER  
LIGDAAKNQVAMNPKNTVFD AKRLIGRKFD DP IIQADMKHWPFTVVND  
CSKPKIQVEFKGETKRFAPEEISSMVLTKMRETA EAYLGGKVQDAVITVPA  
YFNDSQRQATKDAGAIAGLNVLRINEPTAAALAYGLDKNLKGERNVLI  
FDLGGGTFDVSILTIDEGSLFEVRATAGDTHLGGEDFDNRLVNH FVEEFK  
RKYRKDLRTNPRALRRLRTAAERAKRTLSSSTEASIEIDALMDGIDYYTKV  
SRARFEELCADLFRSTLHPVEKALNDAKMDKGLIHDVVLVGGSTRIPKVQ  
SLLQNFFGGKTLNLSINPDEAVAYGA AVQAAILSGDTSSAIQDVLLVDVA  
PLSLGIETAGGVMTKIVERNARIPCKQSQTFTTYSNQP AVTIQVYEGERA  
MTKDNLLGRFDLTGIPPAPRGV PKIDVTFDL DANGILNVS AKENSTGRE

RNIVIKNDKGRLSREEIDRMVNEAERYKEEDDKQRAKVAARNQLESYIFN  
VKQAAEEAGDKLSATDKQSIQEECQAALQWLDNNTLADVEEFNYKLQE  
LQKKCSPIMSKMHQSGQNSQGMPGGQGMSRQGGMPGQGGMPGYGMP  
GQGGMPGYGMPGQGGMPGYGMPGQGGMPGHGGPTIEEID

>WangBtHsp70-6

MPGKTPAIGIDLGTITYSCVGVWQQGKVEIANDQGNRTTPSYVAFTDTER  
LIGDAAKNQVAMNPKN TVFD AKRLIGRKFD DP IIQADMKHWPF TVVND  
CSKPKIQVEFKGETKRFAP EEEISSMVLTKMRETA EAYLGGKVQDAVITVPA  
YFNDSQRQATKDAGAIAGLNVLRINEPTAAALAYGLDKNLKGERNVLI  
FDLGGGTFDVSILTIDEGSLFEVRATAGDTHLGGEDFDNRLVNH FVEEFK  
RK YRKDLRTNPRALRRLRTAAERAKRTLSSSTEASIEIDALMDGIDYYTKV  
SRARFEELCADLFRSTLHPVEKALNDAKMDKGLIHDVVLVGGSTRIPKVQ  
SLLQNFFGGKTLNLSINPDEAVAYGA AVQAAILSGDTSSAIQDVLLVDVA  
PLSLGIETAGGVMTKIVERNARIPCKQSQTFTTYS DNQPAVTIQVYEGERA  
MTKDN NLLGRFDLTGIPPAPRGV PKIDVTFDLDANGILNVS AKENSTGRE  
RNIVIKNDKGRLSREEIDRMVNEAERYKEEDDKQRAKVAARNQLESYIFN  
VKQAAEEAGDKLSATDKQSIQEECQAALQWLDNNTLADVEEFNYKLQE  
LQKKCSPIMSKMHQSGQNSQGMPGGQGMSRQGGMPGQGGMPGYGMP  
GQGGMPGYGMPGQGGMPGHGGPTIEEID

>WangBtHsp70-7

MEKPAIGIDLGTTHSCVGVWQH GKIEIANDQGM RITPSYVAFADGVRLI  
GDSAKIQAATNPENTIFDAKRLIGRKFNDSV VQADIEHWPF AVIDDGGN

PKVRVDHHDGEVKEFAPEEISSMVLSKLETAAYLDCEVTDVITVPAYF  
NDSQRQATKDAGAIAGLNVLRINEPTAAALAYGLDMKGKRNILIFDLG  
GGTFDVSILTIDEGSLFEVKSTAGDTHLGGEDFDSLLVNYLIEEFKRRYKKD  
FAPNPRTLRLRAHAERAKCTLSAAPTNIIDALFDGIDFHTLVTRAKFE  
NLCADLFQRTLITVEKALMDAELGKDAIDDVVVVGGSSRIPKVQSLLQDF  
FGGKTLKHTIHPDEAVAYGAADVQAASLSGNEDLDIKDIVLHDVTPLSLGI  
DIENDVFSVLIKRNTIPCKITRNYTTGVDNQVNIRVEIYEGERAVASENH  
LLGKLLQGIKKAPRGVPNVDSFDLNAEGILSVSAEESGTGNSANITITN  
EKGRLSKEDIIRMIREAKLFKEKDEKHLARSARNQLEDYTYKMMQELK  
AAEELSQADKGCMKEESDKIWDWLKKNPKAGLGEYKQKLQDIQERCQ  
PIMKKIHTEDALLD

>WangBtHsp70-8

MEKPAIGIDLGTTHSCVGVWQHKGKIEIIANDQGNRITPSYVAFSDERLIGD  
AAKTLAPSNKNTIYDAKRLIGRKFDPLVQADMKHWPFTVINDAGNA  
KLRVEYNGMERVFAPPEISSMVLSKLDKTAKVYLDCEITDAVITVPAYFN  
DSQRQATKDAGTIAGLNVLRINEPTAAAIAYGLDQNLKGKRNILVFDLG  
GGTFDVSILTIDEGSLFEVKSTAGDTHLGGEDFDSLLVNHLAKEFKLHKI  
DLTSNSRALCRLRSAAERAKCTLSAASTANIFIDGLFDGIDFHSFLTRAKFE  
DLCGDLFRKTLITVEKAISDAKLEKDAIDDVVLVGGSSRIPKVQSLLQNFF  
DGKSLKHSIHPDEAVAHGAAVLAASLSGNNDLKIKDVVLRDVTPLSLGI  
HMKNDVFSVIIERNRIPCKKTKTYTTEDNQYTAGIDIYEGERTVASQNH  
LLGKLTLEGIQKAPKGETKVAVTFDLNAEGILSVSAEERGTDKSENITITNE

KGRLSKEDIRRMKEAKRYKEEDDKHLARSRARNQLEDYTYKMMQLEA  
AESELSQADKSKLKDESDKIWDWLKENPKAGLGEYKQKLQDIQEKCP  
MKKIHNEALLD

>WangBtHsp70-9

MEKRAIGIDLGTTHSCVCVWQNGKMEVISNEQGNRVTPSYVAFSEVRLIG  
DTAKMLAPINPKNTIFDVKRLIGRKFDPLVQADMKHWPFTVINDAGNP  
KVSVEYQGVKVFAPPEISSMVLSKLETAEVYLNKVTDAVITVPAYFN  
DSQRQATKDAGAIAGLNVLQIINEPTSAAIAYGLDQNLKSKRNILVFDLG  
GGTFDVSFLTVDGSLFEVKSTAGDSHLGGEDFDSLLMNYLIEEFKLKHS  
KDLASNPRALSRLRAAAERAKCTLSSAPTANIMIDSLFDGIDFYTQVTRPK  
FEDLCADLFQRTLTTVEQALTDKIEREAIDDVVLVGGSTRIPKVQLLLQN  
FFDGKTLNHSIHPDEAVAYGAAVQAASLSGNEDLEIKDIVLRDVTPLSLG  
VFTKNDIFSVIIQRNTRIPCKIRREFVTVGDNQESVAIHIYEGERTVATENH  
LLGKVLLQGKRAPKGVTKVDVSFDLNEEGILSVSVEEKGTNKSEQITITNE  
KGRLSKGDIRRMKEAKSFKEKDEKHLARSRARNQLEDYTYKMMQDFKV  
AESQLSQADKSSMKEESDKIWDWLKKNPKAGLGQYKRKLQDIQEKCP  
MKKIHKEALLD

>WangBtHsp70-10

MEKRAIGIDLGTTHSCIGVWQNGKMEIISNEQGNRITPSYVAFSDERFIGD  
TAKMQAPINPKNTIFDVKRLIGRKFDPLVQADMKHWPFTVINDAGNP  
KVRVEYQGVQVFAPPEISSMVLSKLETAEVYLNREVTDAVITVPAYFN  
DSQRQATKDAGTIAGLNVLRIINEPTAAAIAYGLDQNLKSKRNILVFDLG

GGTFDVSVLTVDEGSLFEVKSTAGDTHLGGEDFDSLLVNYLIKEFKLKYYK  
KDLQSNPRALSRLRAAAERAKCTLSSALSANIMIDSLFDGIDFYTLVIRPKF  
EDLCADLFQRTLTTVEQALTDAKLEREAIDDVVLVGGSTRIPKVQSLLEDF  
FGGKSLKHSIHPDEAVAHGAAVLAASLSGNDDIKIKDVVLRDITPLSLGIN  
TKNNVFSVIIERNTRIPCKKTRTYHTTEDNQDGLEFSIYEGERA VASENHL  
LGELTLEGIQKAPKGETKVAVTFDLNEEGILSVSVAEEGTDKSEHITITNEK  
GRLSDKEIRRM IQEAKRFKEEDDKHLARSRARNQLGDYTYKMTQELKAA  
ESKLSKTDKSRLKEESDKIWDWLQKNPKAGLGEYKQKLQDIQEKCSIM  
MKIHKDDALLD

>WangBtHsp70-11

MPGKTPAIGIDLGTITYSCVGVWQQGKVEIIANDQGNRTTPSYVAFTDTER  
LIGDAAKNQVAMNPRNTVFDKRLIGRKFD DPKIQADMKHWPFTIVSD  
CGKPKIQVEFKGEAKKFAPEEISSMVLTKMKETA EAFLGGTVRDAVITVP  
AYFNDSQRQATKDAGAIAGLNVLRIINEPTAAALAYGLDKNLKGERNVL  
IFDLGGGTFDVSILTIDEGSLFEVRATAGDTHLGGEDFDNRLVNH FVEEFK  
RKYRKDLRTNPRALRRLRTAAERAKRTLSSSTEASIEIDALLDGIDYYTKVT  
RARFEELCADLFRSTLHPVEKALNDANMDKGTIHDVVLVGGSTRIPKIQS  
LLQNFFGGKTLNLSINPDEAVAYGA AVQAAILSGDTSSAIQDVLLVDVAP  
LSLGIETAGGVM TKIVERNARIPCKQSQTFTTYS DNQPAVTIQVYEGERA  
MTKDN NLLGRFDLTGIPPAPRGV PKIDVTFDL DANGILNVSAKENSTGRE  
RNIVIKNDKGRLSREEIDRMVNEAERYKEEDDKQRAKVAARNQLESYIFN  
VKQAAEEAGDKLSAEDKQSVQEECQAALQWLDNNTLADVEEFNYKLQ

ELQKKCSPIMSKMHHSQNGQGMPGQGGMPPGYAGHQRSTSGGPTIEEV

D

>WangBtHsp70-12

MVKAPAIGIDLGTTYSCVGVWQQGKVEIANDQGNRTTPSYVAFSDTERL

IGDAAKNQVAMNPQNTIFDAKRLIGRRYDDPKIQDDMKHWPFKVINDC

GKPKLQVEFKGETKTFAPEEVSSMVLTKMKETAEAFLGGQVKDAVITVP

AYFNDSQRQATKDAGAIAGLNVLRINEPTAAALAYGLDKNLKGERNVL

IFDLGGGTFDVSILTIDEGSLFEVRATAGDTHLGGEDFDNRLVNHLAEEFK

RKYRKDLRGNNRALRRLRTAAERAKRTLSSSTEASIEIDALMDGIDYYTK

VSRARFEELCSDLFRSTLHPVEKALADAKMDKGSIHVVVLVGGSTRIPKIQ

SLNQNFCCGKTLNLSINPDEAVAYGA AVQAAILSGDTSSAIQDVLLVDVA

PLSLGIETAGGVMTKIVERNARIPCKQSQTFTTYSNQP AVTIQVYEGERA

MTKDNLLGTFDLTGIPPAPRGV PKIDVTFDL DANGILNVSAKENSTGKS

KNIVIKNDKGRLSREEIDRMVNEAEKYKEEDERQRAKIAARNQLESYVFN

VKQAVDEAGDKLPESDKQLVRDECQAALSWLDNNTLADVEEFNYKLQE

VQKKCSPIMSKMHGAGQGMPGGMGGMPGGMGGMPGGFPGGMPGQ

GGQGPTVEEVD

>WangBtHsp70-13

MKTPAIGIDLGTTYSCVGVWQQGKVEIANDQGNRTTPSYVAFTDTERLI

GDAAKNQVAMNPKN SVF DAKRLIGRKFD DPKIQADMKHWPFTVINDC

GKPKIQVEYKGEVKKFAPEEVSSMVLTKMKETAEAFLGDKVRDAVITVP

AYFNDSQRQATKDAGAIAGLNVLRINEPTAAALAYGLDKNLKGERNVL

IFDLGGGTFDVSILTIDEGSLFEVKSTAGDTHLGGEDFDNRLVNHLEDEFK  
RKYKKDLKTNPRALRRLRTAAERAKRTLSSSTEASIEIDALFDGVDFYTKV  
SRARFEELCSDLFRSTLAPVEKALTDKMDKSAIHDVVLVGGSTRIPKVQS  
LLQNFFCGKSLNLSINPDEAVAYGAAVQAAILSGDTSSQIQDVLLVDVAP  
LSLGIETAGGVMTKIERNARIPCKQSQTFTTYADNQPAVTIQVYEGERAM  
TKDNNLLGTFDLTGIPPAPRGVPKIDVTFDLNANGILNVAKENSTGKSK  
NIVIKNDKGRLSKEEIDRMVNEAERYKEEDDKQRARVNARNQLEAYIFN  
VKQAVEEAGSKLSEVDKNSVKEQCDNTLRWLDNNSLAEKDEYDHKLQE  
VQKVCMPIMSKLHGAGGGAGAPGAGGPTVEEVD

>WangBtHsc70-3

MLYVARVVGRKTLHCCLFNPSYTTSENFSIYLSKTPVIFNSRIYEFQRRFKSE  
QVKGTVIGIDLGTNNSCVAVMEGKTPKVIENSEGSRTTPSVVAFSKDGERI  
VGMPAKRQAVTNSANTFYATKRLIGRRFDDAEVKKDMKTLKYKIVKASN  
GDAWVQATDGKMYSQIGAFVLVKMKETAESYLGTPVKNNAVITVPAYF  
NDSQRQATKDAGQIAGLNVLRVINEPTAAALAYGMDKTDDKIIAVYDL  
GGGTFDISILEIQKGVFEVKSTNGDTFLGGEDFDNVLVNHLETEFKKEQGI  
DVTKDAMAMQRLKEAAEKAKIELSSSLQTDINLPYLTMDASGPKHMNL  
KLTRSKFESLVADLIKRTVAPCQKAIQDAEVGKSDISEVLLVGGMTRMPK  
VQQTVQEIFGRQPSRAVNPDEAVAVGASVQGGVLAGDVTDVLLLDVTP  
LSLGIETLGGVFTRLISRNTTIPTKKSQVFSTAADGQTQVEIKVYQGEREMA  
SNNKLLGQFTLVGIPPAPRGVPQIEVTFDIDANGIVHVSARDKGTGKEQQ  
IVIRSSGGLSKDEIENMVKSAAEYAQSDKIKKERVEAINQAEGIIHDTESKM



TEFKDQLPSEECDKLREQMSKVRDILTKGEEADPEEIRTATNELQQASLKL  
FEMAYKKMAADRDGSSSSSSSEEQSSEEKGEEKEKKENKQ

>WangBtHsp70-14

MGKQVPAVGIDLGTTYSCVGVWQHKGVEIANDQGNRTTPSYVAFNDT  
ERLIGDAAKSQVAMNPKN TVFD AKRLIGRRFDDPKIQDDIKHWPFKVISD  
SGKPKIQVEFKGEQKIFAPEEISSMVLTKMKEVAEVYLG GKVSEAVITVPA  
YFNDSQRQATKDAGAIAGMNVLRINEPTAAALAYGLDKNLKGERNVLI  
FDLGGGTFDVSILSIDEGLFEVKSTAGDTHLGGEDFDNRLVTHFSEEFKR  
KYKKDLRGNARALRRRLRTACERAKRTLSSSTEASLEIDALHEGVDFYAKIT  
RARFEELCMDLFRNTLAPVERALTD AKMDKGSIH DVVLVGGSTRIPKVQ  
KMLQDFFFCGKSLNLSINPDEAVAYGA AVQAAILSGDQSAEIQDVLLVDV  
TPLSLGIETAGGVM TKIVERNARIPCKQTQTFTTYS DNQPAVTIQVFEGER  
SMTRDNNLLGTFNLSGIPPAPRGVPKIEVTFDL DANGILNVSAKDNSSGK  
MERITIKNDKGRLSKEDIEKMLADA EKYKHEDEKQKERV TARNQLEGYT  
FNVKQAVEEAGSKLSETDKKAVLDKCSAVLTWLD TNSLAEKEEYEEKLK  
DLQKDCAPVMTKLHQQGGKGPTVEEVD

>WangBtHsp60

MYRLPSVLRSSAARQLNPSLARFYAKDVRF GP EVRGLMLQGVDILADAV  
AVTMGPKGRNVILEQSWGSPKITKDGVTVA KGVELKDKFQ NIGAKLVQ  
DVANNTNEEAGDGTTTATV LARAI AKEGF EKISKGANPIEIRKGVMLAVE  
TVKNNLKSLSKQVTTPEEIAQVATISANGDGAIGNLISDAMKKVGKEGVI  
TVKDGTLEDELEVIEGMKFDRGYISPYFINTTKGAKVEFQDALLLLSEKKI

SSIQSIIPALELANSKRRPLVIAEDIDGEALSTLVVNRLKIGLQVA AVKAPG  
FGDNRKSTLQDLAIATGGLVFGDEGTAIKLEDVQLHDLGEVGEIVITKDD  
TLILKGKGKKEEIDRRADQLRDQIADTTSEYEKEKLQERLARLASGVALLK  
VGGSEVEVNEKKDRVTDALNATRAAVEEGIVPGGGLALLRCIPKLDAIS  
SKNEDQKTGIEIVKRALRMPCMTIASNAGVDASMVVAKVLESPPEIGYDA  
LNNEYVNMIEKGIIDPTKVVRTALTDAAGVASLLTTAEAVVTEIPKEEP  
MGGMGGMGGMGGMGGMGGMGGMGGMGGM

>WangBtsHsp21.5

MQSALRAALLNELVDEL TNPLSALTDQNFGIGLLTDELNSRPRYQHTALS  
LPLAAGYVRPWRI SPAQQSGVSNIHHDKAAFKVNLDVQQFQPEEVS VKV  
VDGFLVVEAKHEERQDKHGYISRSFTRRYKL PKDINEDAIVSSLSSDGV LTI  
SATVKNQLPSGERQIPITQTNQPALKKAKSDAPQENGKGDKMES

>WangBtsHsp22.6

MADGIKRDIPIRLGDFSVIDSEFSNIRERFDAEMKKMEDEMTKFRSELMNR  
ESNFFKTTTRSTKIGSWDYSS TNSITSNSNNTLSEPKPNLWLESINSPLIQED  
GDNKMLKLRFDVSQYQPEEII VKTVDNKLLVHAKHEEKTDSKSVYREYN  
REFLLPKGTNPESIKSSL SKDGVLTVEAPLPALGAPEKLVPIAHH

>WangBtsHsp21.6

MSLAPYVFRDWWDDLEFGRPSRLIDQHFGGLGLRKDDL FADWPSLV RPSG  
AGYLRPFRNLLRQTSGSSNITADDKSVQVILDVQQFAPNEIVVKTSNGAIV  
VEGKHEEKQDEHGFVSRQFTRRYVLPKDVEIENITSSLSSDGVLTISVPKKN  
PAIPGGEKVVPPIQTHAPALKPAPQPSSSPASSPNVTEIKVQH Q

>WangBtsHsp19.4

MALLPYLLEELNRPTIYDQNFGLGLFNDDFPSAVGSLRPYYLRPWRLFPH  
DESGISSVQHDKDGFKNLDVQQFKPEEVNVKIADNYVIVNAKHEERSD  
EHGFISREFTRRYLLPKDVNAEALTSSLSSDGVLSIQAPPKAITNDKGNER  
QIPVTKTNAPAIKQQQQQQKK

>WangBtsHsp19.5

MSLLPLLLSELEDTRRPSIYDPYYGLGLGDLLAVPARSGYLRPWRLAPHN  
DSGISNIQNDKKEFKVNLDVQQFKPEEINVKTAGDYITVEAKHEERSDEH  
GFVSRQFTRRYLVPQDVNKDAITSTLSSDGVLTIHAPKKAIAAKDERNISIT  
QTNKPALKQGKKDGKPEKMET

>BaiBtsHsp19.5

MALLPYLLEELNRPTIYDQNFGLGLFNDDFPSAVGSLRPYYLRPWRLFPH  
DESGISVQHDKDGFKNLDVQQFKPEEVNVKIADNYVIVNAKHEERSDE  
HGFISREFTRRYLLPKDVNAEALTSSLSSDGVLSIQAPPKAITNDKGNERQI  
PVTCTNAPAIKQQQQQQKK

>BaisBtHsp19.2

MSLLPYLLEELNRPTVYDQNFVGLWNDDLPSITAIRPFYMRPWRLLPQN  
ESGTSVQHDKDGFKNLDVQQFKPEEVNVKVSDNYVTIHAKHEERSDE  
HGFISREFTRRYLIPKDVNAEALTSSLSSDGVLSVHAPPKAITNENGSERQI  
PITCTNAPAIKQEQAQKK

*Athalia rosae*

>ArHsp90|XP\_012250991.1

MPEQMETAGEVETFAFQAEIAQLMSLIINTFYSNKEIFLRELISNSSDALDK  
IRYESLTDPSRLDSGKDLHIKIIPNKNNDGTLTLIDTGIGMTKADLVNNLGTI  
AKSGTKAFMEALQAGADISMIGQFGVGFYSAYLIADKVTTVVSKHNDDEQ  
YLWESSAGGSFTVRPDPGEPLGRGTKIVLHIKVDQTEFLEESKIKEIVKKHS  
QFIGYPIKLLVEKEREKELSDDEAEAEADPEVKKEEDDGKPKIEDVGEDG  
DEDKKEKPKKTKTITEKYTEDEELNKTPIWTRNADDISQEEYGEFYKSLT  
NDWEDHLAVKHFSVEGQLEFRALLFVPRRMPFDLFENKKRKNNIKLYVR  
RVFIMDNCEELIPEYLNFMKGVVDSEDLPLNISREMLQQNKILKVIRKNLV  
KKCLELFEELTEDKESFKKFYEQFSKNIKLGIHEDSTNRSKLADLLRYHTSA  
SGDEVCSLKDYVGRMKPNQKHIYYITGESKEQVANSSFVERVKKRGFEVI  
YMTEPIDEYVVQQMKEFDGNQLVSVTKEGLELPEDDAEKKKKREDDQAKF  
ENLCKIMKNILDTKVEKVVVSNRLVDSPCCIVTSQYGWTANMERIMKAQ  
ALRDTSTMGYMAAKKHLEINPDHSVIETLRQKAEADKNDKAVKDLVVL  
LFETSLSSGFSLDEPQVHAARIYRMIKLGLGIDEEPTADEEPVAAEVTPV  
EGDNEDASRMEEVD

>ArHsp90|XP\_012255700.1

MAAALRVSCGIQRAIKFGRFLTRPSSFRPKNLTNSNRYREPSAFSQNAHIR  
YLSSHAATAESSPDPEHHSIIKDTEKATGQSERHEFQTETRQLLDIVAKSLY  
SDKEVFIRELISNASDALEKLRYLGLSDSANVPAAASQNLEIHIATDKQNR  
ILTIQDTGVGMTREELTSNLGTIARSGSKAFLEQVKNKQGSPGDPSAIIGQF  
GVGFYSAFMVADKVEVFTKSYQKDSEGLHWVSDGSGTYEISAAEGVQSG

TKIVLHLRTDCREFSDDATINNVIKKYSNFVGSPIFVNGKRANVIQPLWM  
LEPKDVKPEDHVQFYRFVGN SFDEPRFTLHYSTDVPLSIRALLYFPEGKPG  
LFEMSRDTDIGVSLYSRKILIKSRADNLPKWLR FVKGVVDSEDIPLNLSRE  
LLQNSALIGKLRNVLT SRILRFLYDRSTKQPEDYAKFYKDYGLFLKEGIVTS  
HDQQEKEEISKLLRFESSTSKPGELVSIPQYLSRLAEGQRDVYYLAAPSRTL  
AEQSPYYEALKKRNV EVLFCYEPYDELVLMQLGQFN SHPLTSVEKEMRH  
NKDD ESQPEFGGLEKSEADRLVNYIEKTLKGKAFSVKVTNRLESHPCVVT  
VEDMAAARHFIRTQSHQLNSESRFTLLQPRLEINPKHPHKKLAQLTNSDQ  
KLADLVTEQLFANAMVGAGLIEDPRTL LSSMNELLTLALEKH

>ArHsp90|XP\_012258880.1

MPEEDSSMAENGEVETFAFQAEIAQLMSLIINTFY SNKEIFIRELISNSSDAL  
DKIRYESLTDPSKLESCKELYIKLIPNKNDRTLTIIDTGIGMTKADLVNNLG  
TIAKSGTKAFMEALQAGADISMIGQFGVGFYSAYLVADKVTVSSKHND  
EQYLWESSAGGSFTVRPDTGEPLYRGTKIVLHIKEDQSEYLEESKIKEIVKK  
HSQFIGYPIKLVVEKERDKELSEEEEEEEDEKPAKDEKDKPKIEEVEDDED  
EEKSTD KKKKKKTVKEKYTEDEELNKT KPIWTRNPDDITQEEYGEFYKSLT  
NDWEDHLAVKHFSVEGQLEFRALLFVPRRAPFDLFENKKKKNNIKLYVR  
RVFIMDNCEDLIPEYLNFIKGVVDS EDLPLNISREMLQQNKILKVIRKNLV  
KKCLELFD ELAEDKESYKKFYEQFSKNLKLGIHEDSQNRKKLSELLRYYTS  
ASGDEKCSLKDYVGRMKEHQKHIFITGESKEQVSNSAFVERVKKRGFEV  
VYMTEPID EYVVQQMKEYDGKQLTSVTKEGLELPEDDAEKKKREDDKAK  
FESLCKVMKDLLDKKVEKVVVSNRLVDSPCCIVTSQYGWTANMERIMKA

QALHDTSTMGYMAAKKHLEINPDHPHIESLRQKAEADKNDKAVKDLVM  
LLFETALLASGFGLEDQPQVHASRIHRMIKLGGLDEDEAPEEEEEKMVEEV  
PPLEEDADEAMRMEEVD

>ArHsp70|XP\_012253227.1

MPAIGIDLGTTYSCVGWQQGKVEIIANDQGNRTTPSYVAFTDTERLIGD  
AAKNQVAMNPSNTVFDKRLIGRRFDDPKVQADAKHWPFRVVDEAGK  
PKIQVEFRGETKRFPNPEEISSMVLTKMKETAEEAYLGQKVRDAVVTVPAYF  
NDSQRQATKDAGAIAGLNVLRINEPTAAALAYGLDKNLKGERNVLIFD  
LGGGTFDVSILSIDEGLFEVRATAGDTHLGGEDFDSRLVDHFAAEFERKY  
RKNLRKNPRAVRRRLRTAAERAKRTLSSSTEASVEIDALFEGIDFYTKVSRA  
RFEELCADLFRGTLAPVEKALADAKMDKGAIHDIVLVGGSTRIPKIQSL  
QNFFCGKQLNLSINPDEAVAYGAAVQAAILSGEGDTC SKLQDVLLVDVA  
PLSLGIETAGGVMTNIIERNARIPCKQTQTFTTYADNQPGVSVQVFEGERA  
MTKDNLLGRFELSGIAPAPRGLPKIEVTFDLDANGILHVTAKDTASGRS  
SDVRITNDKGRLSREEIDRMLAEADRYKEQDREQRERVAARNELEGYVFT  
VKQALQEHAERLPQEDREAVATLCEETVRWLDNNSLAEKDEYRDKLEA  
LQKRCSAVMAKLHQGAGNAAPGAQDCGAQFRQAGGNHSGPTVEEVD

>ArHsp70|XP\_012253231.1

MPAIGIDLGTTYSCVGWQQGKVEIIANDQGNRTTPSYVAFTDTERLIGD  
AAKNQVAMNPSNTVFDKRLIGRRFDDPKVQADAKHWPFRVVDEAGK  
PKIQVEFRGETKRFPNPEEISSMVLTKMKETAEEAYLGQKVRDAVVTVPAYF  
NDSQRQATKDAGAIAGLNVLRINEPTAAALAYGLDKNLKGERNVLIFD

LGGGTFDVSILSIDEGLFEVRATAGDTHLGGEDFDSRLVDHFAAEFERKY  
RKNLRKNPRAVRRRLRTAAERAKRTLSSSTEASVEIDALFEGIDFYTKVSRA  
RFEELCADLFRGTLAPVEKALADAKMDKGAIHDIVLVGGSTRIPKIQSLL  
QNFFCGKQLNLSINPDEAVAYGA AVQA AILSGEGDTCSKLQDVLLVDVA  
PLSLGIETAGGVMTNIIERNARIPCKQTQTFTTYADNQPGVSVQVFEGERA  
MTKDNLLGRFELSGIAPAPRGLPKIEVTFDLDANGILHVTAKDTASGRS  
SDVRITNDKGRLSREEIDRMLAEADRYKEQDREQRERVAARNELEGYVFT  
VKQALQEHAERLPQEDREAVATLCEETVRWLDNNSLAEKDEYRDKLEA  
LQKRCSAVMAKLHQGAGNAAPGAQDCGAQFRQAGGNHSGPTVEEVD  
>ArHsp70|XP\_012255909.1

MPAIGIDLGTTYSCVGVWQQGKVEIIANDQGNRTTPSYVAFTDTERLIGD  
AAKNQVALNPANTVFDKRLIGRRFDDPKIQDDMKLWPFRVIEEGGKP  
KIQVEYRGEVKRFNPEEISSMVLTKMKEIAEAFLGQKIKDAVITVPAYFND  
SQRQATKDAGAIAGINVLRIINEPTAAALAYGLDKNLKGERNILIFDLGG  
GTFDVSILTIDEGLFEVKSTAGDTHLGGEDFDSRLVEFFAKEFERKYKKN  
LRNNPRALRRLRTASERAKRTLSSSTEASIEIDALFDGIDFYTKVSRARFEEL  
CADLFRATLEPVEKALTDKMDKRSIHDIVLVGGSTRIPKIQNLLQNFFSG  
KMLNLSINPDEAVAYGA AVQA AILSGEGDTSTSLQDVLLVDVAPLSLGIE  
TAGGVMTNIIIDRNARIPCKQTQIFTTYADNQPGVSIQVFEGERALTKDNN  
LLGRFELSGISPAPRGVPKIEVTFDLDANGILHVTAKDTASGRSSDVRITND  
KGRLSREEIDRMLAEADRYREQDKQQRERIA TRNQLESYIFSVKQAVQEQ  
GSKLSQEDKNMVFNLCEETIRWLDSENTLAEKEEYQHKLDVVQKQCQPIM

TKLHQGGGTGDRAPNYGSQPDCSSDYSGPTVEEVD

>ArCpn60|XP\_012257851.1

MYRLPNMLRGVALRQMNLHSRSYAKDVRFGAEVRALMLQGVDILADA  
VAVTMGPKGRNVILEQSWGSPKITKDGVTVAKGVELKDKFQNIGAKLVQ  
DVANNTNEEAGDGTTTATVLARAIKEGFEEKSGANPVEIRRGVMLAV  
EKVKDELKNLSKPVTTPEEIAQVATISANGDTAIGNLISDAMKKVGKEGV  
ITVKDGKTLIDELEVIEGMKFDRGYISPYFINSSKGAKVEFQDALVIFSEKKI  
SSVQSIIPALELANAQRKPLVIIAEDIDGEALSTLVVNRLKIGLQVAAVKAP  
GFGDNRKATLQDMAISTGGIVFGDDANLIKLEDVQLSDLGHIGEIVITKD  
DTLMLKGKGKKEDVDRRADQIRDQIADTTSDYEKEKLQERLARLASGVA  
VLRVGGSSSEVEVNEKKDRVHDA LNATRAAVEEGIVPGGGTALLRCVPAL  
LKMKAANADQETGIKIVADALRMPCLQIAQNAGVDGSVVVAKVSEGTL  
GYDAMNNEYVDMIEKGIIDPTKVVRTALTDAAAGVASLLTTAEAVVTEIPK  
EDPPMPAMGGMGGMGGMGGMGGMGGMGGM

>ArsHsp25.7|XP\_012255770.1

MADSGIRRDIPIKLREISVLDSEFANIRERFDAEMRKMEDEMSKFRSKLMD  
RESNNFFKSTTSTHHMTSEHRTSKSTTGDWETLDSAVPTSKSAFDSFSSKT  
TQEQTQNSSLTPHHDSNTWLDGLDSPLIQDEGGNKSLKLRFDVSKYTPEE  
IVVKTVDNKLLVHAKHEEKSESKSVYREYNREFLLPKGTNPESIKSSLSKD  
GVLTV EAPLPLASGETRIPITHK

>ArsHsp21.6|XP\_012255771.1

MADSGIRRDIPIKLREISVLDSEFANIRERFDAEMRKMEDEMSKFRSKLMD



RESNNFFKSTTSKTTQEQTQNSSLTPHHDSNTWLDGLDSPLIQDEGGNKS  
LKLRFDVSKYTPEEIVVKTVDNKLLVHAKHEEKSESksVYREYNREFLLPK  
GTNPESIKSSLSKDGVLTVEAPLPLASGETRIPITHK

>ArCpn10|XP\_012257765.1

MSVAAAARKRLIPLFDRVLIQRAEAVTKTKGGIVLPEKAQAKVLKGTVVA  
VGPGSRNNNGDHVPLSIKVGDTVLLPEYGGTKVELEENKEYHLFRETDL  
AKLES

*Drosophila ananassae*

>DaHsp90|XP\_001956817.1

MPEEAETFAFQAEIAQLMSLIINTFYSNKEIFLRELISNASDALDKIRYESLT  
DPSKLD SGKELYIKLIPNKTAGTLTIIDTGIGMTKSDLVNNLGTIAKSGTKA  
FMEALQAGADISMIGQFGVGFYSAYLVADKVTVT SKNNDDEQYIWESSA  
GGSFTVRADNSEPLGRGTKIVLFIKEDQTDYLEESKIKEIVNKHSQFIGYPIK  
LLVEKEREKEVSDDEAEDEKKEDKKEMDTDEPKIEDVGEDEDADKKDK  
DAKKKKTIKEKYTEDEELNKT KPIWTRNPDDISQEEYGEFYKSLTNDWED  
HLAVKHFSVEGQLEFRALLFIPRRTPFDLFENQKKRN NIKLYVRRVFIMD  
NCEDLIPEYLNFIKGVVDSEDLPLNISREMLQQNKVLKVIRKNLVKKTME  
LIEELTEDKENYKKFYDQFSKNLKLGVHEDSNNRAKLADFLRFHTSASGD  
DFCSLSDYVSRMKENQKHVYFITGESKDQVSNSAFVERVKARGFEVVYM  
TEPIDEYVIQHLKEYKKGKQLVSVTKEGLELPEDETEKKKREEDKAKFESLC  
KLMKSILDNKVEKVVVSNRLVDSPCCIVTSQFGWSANMERIMKAQALRD  
TATMGY MAGKKQLEINPDHPIVETLRQKADADKNDKAVKDLVILLFETS

LLSSGFSLDSPQVHASRIYRMIKLGLGIDEDEPMTTEDNQSAGDAPSLVED  
TEDASHMEEVD

>DaHsp90|XP\_001961320.1

MSVRAIGVLGQARHLGRLAGTMRQCLRPAGWALHRAVD SKRSPAGFQ  
MRGFATETEAKTGSVVDKHEFQAETRQLLDIVARSLYSDHEV FVRELISN  
ASDALEKFRYTLLSSGEAELAGMDRPLEIRITTDKPQMQLIIQDTGIGMTK  
EELISNLGTIARSGSKQFLEQMKDSQKGASSEASSNIIGQFGVGFYSAFIVA  
NKVEVYTRAAVS NAPGLRWSTDGSGSYEIEETSDAELGTKIVLHLKTDCR  
EYADEERIKAVIKKYSNFV GSPILLNGKQANEIKPLWLLDPQSISKEQHHD  
FYRFISNSFDIPRFTLHYNADVPLSIHALLYFPEGKPG LFEMSRDGNTGVAL  
YTRKVLIQSKTEHLLPKWLR FVKGVVDSEDIPLNLSRELLQNSSLIRKLSSVI  
STRVIRFLQERAKKQPEEYEA FYRDYGLFLKEGIVTSNDPAEKEEIAKLLRF  
DSSKSETQSGRMSLEEYYKTV PADQQNIYYLAAPNRVLAESSPYYESLK KR  
NELVIFCYEPYDELVLMQLGKFKSKNLVSVEKEMREESKDVNAATDFGE  
GSLLRSELD SLIPWLEGELKGHVVKVKATSRLDTHPCVITVEEMAAARHFI  
RTQSHQVPEQNR FALLQPELEINPKHPHPIKKLNLKLRSDQELAQLIAKQLF  
ANAMVGAGLAEDPRMLLTNMNTLLARALEKY

>DaHsp70|XP\_001953834.1

MPAIGIDLGTTYSCVGVFQH GKVEIANDQGNRTTPSYVAFTDSERLIGDA  
AKNQVAMNPKNSVFD AKRLIGRKYDDPKIQEDIKHWPFKVISDCGKPK  
MSVEFKGEEKRFAPEEISSMV LIKMKETA EAYLGTSVRDAVITVPAYFNDS  
QRQATKDAGAIAGLNVLR IINEPTAAALAYGLDKNLKGERNVLIFDLGG

GTFDVSILTIDEGSLFEVRSTAGDTHLGGEDFDNRLVNHLAEFEKRFKK  
DLRSNPRLRRLRTAAERAKRTLSSSTEASIEIDALFEGHDFYTKVSRARFE  
ELCGDLFRNTLQPVEKALNDAKMDKGQIHDIVLVGGSTRIPKVQNLLQG  
FFGGKTLNLSINPDEAVAYGAAIQAAILSGDESSQIKDVLLVDVAPLSLGIE  
TAGGVMTKLIERNRIPCKQSKTFTTYADNQPAVTIQVFEGERALTKDNN  
VLGTFNLTGIPPAPRGVPKIDVTFDL DANGILNVTAKEQGTGNARNITIK  
NDKGRLSQADIDRMLNEAEKYAEEDERHRQRIAARNQLEGYVFSVKEA  
AEQGGDRISQSDKSSVLEKCNEAVKWLDSENTTAEKEEFEHKLEELTKFCS  
PIMTKMHQQGAGAGGDGAGANCGQQSRNYNNGGFKGPTVEEVD

>DaCpn60|XP\_001962681.1

MDTGKGSEDWSPSMPRGMNLAAGINKFGLDVGQYCVRQSLVTDEESPL  
VMIRMFSTYSTTLQRGIRINRHMWGTRFYAKDVKFGPEVRAMMLQGVD  
VLADAVAVTMGPKGRNVIIEQSWGSPKITKDGVTVAKSIALKDKFQNI  
AKLVQDVANNTNEEAGDGTTTATVLARAIKEGFEKISRGANPVEIRRG  
VMLAIDSVKDNLRKMSRPVSTPEEICQVATISANGDKSVGNLISEAIKKVG  
RDGVITVKDGKTLCDLEVEIEGMKFDRGYISPYFINASKGAKAEFQDALL  
FCEKKIKSAPSIVPALELANAQRKPLIIIAEDVEGEALSTMVNVNRLKVGLQ  
VCAVKAPGFGDNRKETMEDMAIATGGIVFGDEANLVRLEDVKLSDFGR  
VGEVVVTKDDTMLLKGGKGQKEQIDKRVENLREAIKESTSTYEKEKMQER  
LARLSSGVALLRVGGSSDIEVSEKKDRVNDALNATRAAVEEGIVPGGGTA  
LLRCIQKLNDINGANEDQKLGVEIIRRALRMPCLTIKNAGVDGAMVVA  
KVEILDGDYGYDALKGEYGNMIERGIIDPTKVVRTAITDAAGVASLLTTA

EAVVTELPLEEAAAAGAAAGLGALGGMGGMGM

>DaCpn60|XP\_001963430.1

MFRLPVSLARTSISRQLAMRGYAKDVKFGPEVRAMMLQGVDVLADAVA  
VTMGPKGRNVIIQSWGSPKITKDGVTVAKSIELKDKFQNIQAKLVQDVA  
NNTNEEAGDGTTTATVLRARIAKEGFEKISKGANPVEIRRGVMLAVETV  
KDNLKAMSRTVKTPEEIAQVATISANGDQAIGKLISDAMKKVGRDGVIT  
VKDGKTLNDELEVIEGMKFNGGYFFPYFINSTKGAKVEFQDALLLSEKKI  
SSVQSIIPALELANAQRKPLVIIAEDIDGEALSTLVVNRLKIGLQVA AVKAP  
GFGDNRKSTLTDMAIASGGIVFGDDADLVKLEDVKISDLGQVGEVVVTK  
DDTLLKKGKGKKEDVARRVDQLKDQITETTSEYEKEKLQERLARLASGV  
ALLRVGGSSEVEVNEKKDRVHDA LNATRAAVEEGIVPGGGTALLRCIEK  
LDDVKTQ NEDQNLGVEIVRRALRMP CMTIAKNAGVDGSMVVAKVETQ  
KGDYGYDALKGEYGNLIEKGIIDPTKVVRTAITDASGVASLLTTAEAVVTE  
IPKEDAGPGMGGMGGMGGMGGMGGMGGMGGM

>DaCpn60|XP\_001965046.1

MLHRVGLKGYALVRTYAKDIRFGLEARSMMLHGVNVMANAVATTLGPK  
GRNVLIEQLLVSPKITKDGITVANNVELKDRRCNLGAQLIRQATNKTNNE  
VGDGTTTATILARGMTCRGMQILRQPNINVQLLREGMLSAARVVSDALQ  
DMSQTIDTIGEVEAVAKVALNGDESLSGLIGDVILELGESGVILVKDSSTG  
QDEVIFQDGVHISSEYASPPFALNMKDGLLEFRDCLLLITLAKIKAVSQILP  
ALEMAKAKDQPIVIAKEFSADV LKALVVNQLQETVQVCAINAPGCVDE  
MREDMQDLAICTGATLLEDES WLADLTEDHFGEVEEVFVNAKETHLLRP

LNVDKKLKKRRFSEIAELKDQAFTDEEMERLHQREGRLMGRMAVIHVG  
GVSEMEIVERKERLKDCINAVRKAMSDGVLPGGGTAYLRCIPILDELKPA  
KTMEQQMGREIVRDALRLPCYTIARNAGVDPDEVTHNVLEGNGNFGYD  
AAAGEYGDLMERQIMDPTDVMRHAVVGATGIAALMATTEVLITEEPVK  
PRIPKNQVTRDLANLVGM

>DaCpn60|XP\_001965381.1

MFRSCVRDAIRSSRFFTRMYSKEVRFGEVVRAMMIRGVDVLADAVAVTM  
GPKGRSVIVERPWTSPKITKDGF TVARSIALKDQHMNLGAKLVQDVADN  
TNQAAGDGTTTATV LARAI AKEGFNQITMGANPNEIRRGVMMMAVDVV  
KEMLKAMSKSVESSEEIQQVATISANGDTDIGRLIAEATEKVGAKGTITVK  
DGKRLKDELTHIQGLRFD TGYVSPFFVNSTKGSKVEFSNALVLITLKKITAL  
SQIVKGLEQSLRERRPLVIIAEDISGEALNALVLNKL RMGLQVCAVKSPSY  
GEHRKELIGDISAATGATIFGDDINYSKIENAKLQDMGQVGEAVITKDST  
MLLEGKPKTGQLELRIQQIQDELADKQTKPEQKDRLRQRLSALT KGVAV  
LHIGGISEVEVSEKKDRVVDALHATRAAIEEGIVPGGGTAFLRCIPH LERM  
EVESKDLKKGVEIICNALRMPCQTIAQNAGVDGAMVVAKVMTKSGDYG  
YDAMGGQYGR LIEKGIIDPTKVVRTAISDAAGVASLLSTTEVVITDTRNED  
LLAKLAGMGGGGGMDGLDMNMGGLDELAALAGMGGMGGMGGMGG  
MGGLGGLGGLGDMGDMTGRISASVPKEDDGPTAEEMNEMVKAIPGME  
QVEVKDIDAGLM

>DaCpn10|XP\_001955477.1

MASAIKKVIPMLDRILIQRFEVKTTTAGGILLPEESVPKEMQGVVVAVGPG

ARNPAGAGHLSVAVKEGDRVLLPKYGGTKVDMDDKHEYVLFRESDILAKLE

>DaCpn10|XP\_001956372.1

MAAAIKKIIPMLDRILIQRAEALTKTKGGIVLPEKSIGKVLEGTVVAVGPG  
ARNASTGNHIPIGVKEGDRVLLPEFGGTVNLEGDEKQELILFRESDILAKLE

>DasHsp18.1|XP\_001957242.1

MALVPATNSTNDWDYWDYRRRLWRDWDLADWDLPYWKRSLSRVGSA  
PDLSRVIVGKDGFEANVDVHLFKPYEITVKTGTGDTVVEAKHEKRRDGD  
TFVGRHIVKRFLPRGYYPNDVRSELSSDGILTVRCPPYLTNERSVYVRQV  
GPSYLSIKN

>DasHsp21.7|XP\_001957989.1

MPDIPFVLNLDSPDSMYYGHDMFPNRLYRRLHSRQHHDLDLHTLGLIAR  
MGAHAHHLVAKKHSGELGALGVSGPLNKQGNFEVHLDVGLFEPGEISV  
KLVNDCIVVEGKHEEREDEHGHVFRHFVRRYPLSKEFDADAIASTLSEDG  
VLNITVPPLVSKEETKERVPIPIKHVGPSDLFLNGNGKKEAAPAPDSK

>DasHsp19.8|XP\_001957992.1

MRS LPMFLRMAEEMTRMPRISSPFHAFHEPPVWSVALPRNWQQIARW  
QE QEFAPPATVSKEGYKLTLDVKDYNELNVKVLDES VV LVEGKSEQKDD  
EHGGFSSRHFLRRFVLPEGYEADKVTSSLSSDGVL TINVPNPPAVQEALKE  
RVVPIEKTGEPAKKLEAESNSEATKK

>DasHsp23.6|XP\_001957993.1

MSLVPTTYRDLSRELDPRPIYQPPYDFQLYPYLWDDPRVWWPAHTSRSD  
MMRPLDELVTRRVNRNQLIQSTPYDWSYPMRWDNYYSGERVHVDEKGR  
IDIDVRQFHPHEIVVKTNDYIIVQGNHNRRSEGSNGLVERHFVRKYLLP  
RGYNANEVISDISSDGVLTIKAPPPPPAKYYAPGERLVRVHETGKLALPW  
K

>DasHsp22.7|XP\_001957994.1

MSLSTLLSLVEDLQEPRNSIYDWGVSPNIRYLQAHTPNRRSINGCPCASPI  
CPSSPAGQVMALRREMNNHNNIHWPAVKQVGKDGQVCMDVAQFKP  
SELNKVVVDNSILVEGKHEERQDDHGHIMRHFVRRYTVPEGYEADKVVS  
QLSSDGVLTVSIPKPQAIEDKSKERIIQIQVGPAPHLNIKANASEQKGS  
GTSNGSAK

>DasHsp21.1|XP\_001957996.1

MATLPLLSLADDLGRMSMVPFYEPYYCQRQRSPYLALAGPLEHQLRQL  
EKQVGAAGGAKAIVPKVGKDGQVCMDVSHFKPSELVVKVQDNSILVE  
GKHEEREDDHGYITRHFVRRYALPEGYEADKVASTLSSDGVLTVNVPKPP  
AIEDKASERIVQIQVGPAPHLNVKQNTKEQLEQGQEQDNGNEK

>DasHsp24.5|XP\_001957997.1

MSIIPLLNLARELDHDYRGAFNNDWDHFLDDFGFGVHAHDLFHRPRL  
MMPHGSIGRRRFLPYERNHHHGHHLVPRRQSGGQNSLLPAVGKDGQ  
VCMDVSQFKPNELTVKVVDKTVVVEGKHEEREDGHGLIQRHFVRKYTLP

KDFDPNEVVSTVSSDGVLTALKAPPPPSKEQAKPERIVQIQQTGPAHLSVK

APEAAAAADGKAENGAGEKMETGK

>DasHsp21.9|XP\_001963454.1

MAEANKRNIPIKLGDFSVIDTEFSNIRERFDSEMRKMEEEMAKFRHELMN

REANFFESTSSTKKTTTTTSSTNSALPSRIPKQQNYVSDISSPLIQDEGDNK

VLKLRFDVSQYAPEEIVVKTVDQKLLVHAKHEEKSDTKSVYREYNREFLL

PKGVPNPESSIRSSLKDGVLTVDAPLPALTAGETLIPIAHK

>DasHsp24.4|XP\_001963037.1

MPIHWDWDWEHEHEHVGAHYHWPPRRHWSTGEPKCRQRRYYLSHEL

DVCARDFHLRMDDSAWCHGSLVGRVVIETGTEPDSLGRGTFKVVLDV

HHFQIGELTVKAKNSDTVCEVGKQADDRAEKGQLCITREFTRSYKLPRH

YDATQARATFSADGILMITVPAPPKLDDVERVVEIEPTGNYFGSVADPSA

AKAIEQAELEGGGEDPAGTAMEK

### *Plutella xylostella*

>PxHsp90|Px010238.1

MPEEMQAQSGEVETFAFQAEIAQLMSLIINTFYSNKEIFLRELISNSSDALD

KIRYESLTDPSKLDGKELYIKIIPNKAEGTLTIIDTGIGMTKADLVNNLGTI

AKSGTKAFMEALQAGADISMIGQFGVGFYSCYLVADRVTVTSKHNDDE

QYMWESAAGGSFTIRSDASEPLGRGTKIVLHIKEDLTEYLEEHKIKEIVKK

HSQFIGYPIKLMVEKEREKELSDDEAEEEEKKEEGEDDKPKIEDVGEDEDED

AKDKKKKKKKTIKEKYTEDEELNKTPIWTRNADDITQEEYGDFYKSLTND



WEDHLAVKHFSVEGQLEFRALLFVPRRAPFDLFENKKRKNNIKLYVRRV  
FIMDNCEDLIPEYLNFIKGVVDSEDLPLNISREMLQQNKILKVIRKNLVKK  
CLELFEELAEDKENYKKYYEQFSKNLKLGIHEDSQNRNKLADLLRFHTSA  
SGDEACSFKEYVSRMKENQKHIYYITGENRDQVSNSFVERVKKRGYEVV  
YMTEPIDEYVVQQMREYDGKTLVSVTKEGLELPEDEEEKKKREEDKVKFE  
NLCKVMKNILDNKVEKVVSNSRLVESPCCIVTAQYGWSANMERIMKAQ  
ALRDTSTMGYMAAKKHLEINPDHSIVETLRQKAEVDKNDKAVKDLVILL  
YETALLSSGFSLDEPQVHASRIYRMIKLGLGIDEDEPIQVEEASAGDVPPL  
GDGDDASRMEEVD

>PxHsp70|Px012982.1

MRAKMRWSLVTLVCVLAAVCADEKKEKDKDIGTVIGIDLGTTYSCVGVY  
KNGRVEIANDQGNRITPSYVAFTADGERLIGDAAKNQLTTNPENTVFD  
AKRLIGREWSDATVQHDKFFPFDVVEKNSKPHVSVQTAQGKKVFAPEE  
ISAMVLTKMKETAAYLGKKVTHAVVTVPAYFNDAQRQATKDAGVIAG  
LNVMRIINEPTAAAIAYGLDKKEGEKNVLVFDLGGGTFDVSLLTIDNGVF  
EVSATNGDTHLGGEDFDQRMVMEHFILYKKKKKGKDIRKDNRAVQKLRR  
EVEKAKRALSSSHQVKIEIESFFEGDDFSETLTRAKEELNMDLFRSTLKPV  
QKVLEDADMNKKDVDEIVLVGGSTRIPKVQQLVKEFFNGKEPSRGINPD  
EAVAYGAAVQAGVLSGEQDTDAIVLLDVNPLTMGIETVGGVMTKLIPRN  
TVIPTKKSQIFSTASDNQHTVTIQVYEGERPMTKDNHLLGKFDLTGIPPAP  
RGIPQIEVTFEIDANGILQVSAEDKGTGNREKIVITNDQNRLTPEDIERMIK  
DAEKFADDDKKLKERVEARNELESYTYSIKNQLQDKEKLGAKLSDDDEKT

KMEEAIDAAIKWLEDNQDVDAEEYKKQKKSVEDVVQPIIAKLYQGQPG

APPPAGEPDDDFKDEL

>PxHsp70|Px002762.1

MRAKMRWSLVTLVCVLAAVCADEKKEKDKDIGTVIGIDLGTTYSCVGVY

KNGRVEIANDQGNRITPSYVAFTADGERLIGDAAKNQLTTNPENTVFD

AKRLIGREWSDATVQHDKFFPFDVVEKNSKPHVSVQTAQGKKVFAPEE

ISAMVLTKMKETAEAYLGKKVTHAVVTVPAYFNDAQRQATKDAGVIAG

LNVMRIINEPTAAAIAYGLDKKEGEKNVLVFDLGGGTFDVSLLTIDNGVF

EVVATNGDTHLGGEDFDQRMVMEHFILYKKKKKGKDIRKDNRAVQKLRR

EVEKAKRALSSSHQVKIEIESFFEGDDFSETLTRAKEELNMDLFRSTLKPV

QKVLEDADMNKKDVDEIVLVGGSTRIPKVQQLVKEFFNGKEPSRGINPD

EAVAYGAAVQAGVLSGEQDTDAIVLLDVNPLTMGIETVGGVMTKLIPRN

TVIPTKKSQIFSTASDNQHTVTIQVYEGERPMTKDNHLLGKFDLTGIPPAP

RGIPQIEVTFEIDANGILQVSAEDKGTGNREKIVITNDQNRLTPEDIERMIK

DAEKFADDDKKLKERVEARNELESYTYSIKNQLQDKEKLGAKLSDDEKT

KMEEAIDAAIKWLEDNQDVDAEEYKKQKKSVEDVVQPIIAKLYQGQPG

APPPAGEPDDDFKDEL

>PxHsp70|Px009079.1

MLCATRSFGRKALECSGVTSDLYTQRNFSLLRNTASPTVPIYRHGLQSRH

KSEGVRGAVIGIDLGTTNSCVAVMEGKTPKVVENSEGSRTTPSHVAFSKE

GERLVGMPAKRQAVTNSGNTFYATKRLIGRRFDDPEVQKDLKNLSYKVV

KASNGDAWVQGTGDKMYSPSQIGAFVLIKMKETAEAYLNTTVKNAVVT

VPAYFNDSQRQATKDAGQISGLNVLRVINEPTAAALAYGMDKTDDKIIA  
VYDLGGGTFDISVLEIQKGVFEVKSTNGDTLLGGEDFDNVLVNFLVDEFK  
KDQGIDLRKDAMAMQRLKEAAEKAKIELSGSVQTDINLPYLTMDAAGP  
KHMNLKMTRSKLESLVGDLIKRTVAPCQRALQDAEVTRTDIGEVLVGG  
MTRMPKVQSTVQEIFGRAPSRVNPDEAVAVGAAVQGGVLAGDVTDIL  
LLDVTPLSLGIETLGGVFTKLITRNTTIPTKKSQVFSTAADGQTQVEIKVHQ  
GEREMAADNKMLGQFSLVGIPPVEVTFDIDANGIVHVSARDKGTGKEQQ  
IVIQSSGGLSKDEIENMVKAAEKFAAADKQRRERVEVSNQAEGVLHDTE  
TKMDEYKAQLPQEECDKLKTEITALRDLLAKKDEADPEDIRKATGALQQ  
ASLKLFEQASLKLFEQAYKKMAAEREGNNQQQTETPPSEDDKKEEKKN

>PxHsp70|Px003972.1

MPAVGIDLGTTYSCVGVWQHGNVEIANDQGNRTTPSYVAFTDTERLIG  
DAAKNQVALNPNTVFDKRLIGRKFDDEPKIQADMKHWPFKVVSDCG  
KPKIQLEYKGETKRFAPEEISSMVLTKMKEIAEAYLGTSVRDAVVTVPAYF  
NDSQRQATKDAGAIAGLNVLRIINEPTAAALAYGLDKNLKGERNVLIFD  
LGGGTFDVSILSIDEGLFEVKSTAGDTHLGGEDFDNRLVNHLVQEFKRK  
YHKDLTGNNARALRRLRTAAERAKRTLSSSEATIEIDALYDGIDYYTRVSR  
ARFEELNADLFRGTLEPVEKALKDAKLDKSQIDDVVLVGGSTRIPKIQTM  
LQNFFCGKKLNLSINPDEAVAYGAAVQAAILTGNLTDTRIQDVLLVDVAP  
LSLGIETAGGVMTKIERNSKIPCKQSQTFTTYADNQPAVTIQVFEGERALT  
KDNLLGTFDLTGIPPAPRGVPKIDVTFDMDANGILNVSAKDNSSGRSK  
NIVIKNDRGRLSQAEIDRMLSDAEKYKDEDEKQRKRIAARNQLEAYIFSV

KQAVEESGDKLSDDDKGTARRECEEALKWLDN>NNLADQEEYEHKLKEL  
Q RVCSPIMTRMHGGGNACNGGGMPGGMPGGGMGGMPGGMGGMPG  
GMGGMPGGMGGMPGDYGNNSGPTIEEVD

>PxHsp70|Px007715.1

MPAIGIDLGTTYSCVGVWQHGNVEIANDQGNRTTPSYVAFTDSERLIGD  
AAKNQVALNPNNTVFDAKRLIGRKFD DPKIQADMKHWPFRVVSDCGK  
PKIQVEFKGESKTFAPEEISSMVLTKMKETA EAYLGTA VRDAVVTVPAYF  
NDSQRQATKDAGAIAGLNVLRIINEPTAAALAYGLDKNLKGERNVLIFD  
LGGGTFDVSILTIDEGSLFEVKATAGDTHLGGEDFDNRLVNH LAEEFKRK  
YKKDIRANSRALRRLRTAAERAKRTLSSSSEATIEIDALYEGVDFYTRVSRA  
RFEELNSDLFRGTLEPVEKALRDAKLDKSSIHDVVLVGGSTRIPKIQSMLQ  
SFFNGKQLNLSINPDEAVAYGA AVQAAILSGEQHSKIQDVLLVDVAPLSL  
GIETAGGVMTKIIERNAKIPCKQSQTFTTYADNQPAVTIQVYEGERAMTK  
DNNLLGRFDLTGIPPAPRGVPKVDVTFDL DANGILNVGRTKNIVIKNDK  
GRLSQAEIERMLAEAERYRDEDERQRERVAARNQLETYIFGVKQALDDA  
GDRLSEQDKQAARGRCDDALRWLDNNTLAERDDKLTARTDVKIALAAS  
AALSAWYVRNSFKTKGKSSDGQLSTLSPEERIQYMIKEKNKKGPKAQVD  
ARFFAELKALWKIMVPGLWTKEAGYMALIAFSLISRSMCDLWLIQHTTLI  
EGSIISMNKKEFVRLLTQFFTAMPLISLVNNILKWSIGEMKLNIRTNLTMH  
LYENYMKGFTYYQVTNLDNRISNADQLLT DVEKFCETVVDLYSNISKPM  
LDIGIYLYRLTMNLGATKFCETVVDLYSNISKPM LDIGIYLYRLTMNLGGT  
TPGIMMAYLFLSGVLLTHLRKPTARLTVEEQKLEGEFRYVNSRLITNSEEIA

FYQGNHREQLTLLASFYKLTRHLRRLNFRVGMGFVDNIIAKYIAITVGFF  
AVSRPFFVKDHNLLTTGSDNDRFKHYITYGRMLVKMAEAIGRLVLSGRE  
LTKLAGLTSRVTQLRVVLDEVNKGKYTRTMLDNSTANGHGNGPPMILA  
PGAGRIIYQDNIIKFDKVPLVTPNGDVLIELCFEVKSGINVLVCGPNGCG  
KSSMFRTLGEIWPVFGGALTKPPRGKLFYVPQRPYMTLGTFRDQIIYPQTR  
EEMLRGRSDTELTKFLDIVQLSYLSQRDGGWDAVEDWMDVLSGGEKQ  
RVAMARLFYHEPQFAILDECTSAVSVDVEGQMYQYCREMGISLFTVSHR  
KSLWKHHDHFLQMDGLGGYVFGEIDGETQEFGS

>PxHsp70|Px010237.1

MPAIGIDLGTITYSCVGVWQHGNVEIIANDQGNRTTPSYVAFTDSERLIGD  
AAKNQVALNPSNTVFDKRLIGRKFDDEPKIQADMKHWPFKVISDGGKP  
KIQVEFKGEVKKFAPEEVSSMVLTKMRETAEAYLGTSVKDAVITVPAYFN  
DSQRQATKDAGAIAGLNVLRIINEPTAAALAYGLDKNLKGERNVLIFDL  
GGGTFDVSFLTIDEGALFEVRSTAGDTHLGGEDFDNRLVNHLADEFKRK  
YKKDLRQSPRALRRLRTAAERAKRTLSSSTEATIEVDALYDGEDFYTRVSR  
ARFEELNADLFRGTLEPVEKALKDAKLDKSQIHDVVLVGGSTRIPKIQSL  
QNLFCGKKLNLSINPDEAVAYGA AVQAAILSGSTDARIQDVLLVDVAPLS  
LGIETAGGVMTKIIERNSKIPCKQSQTFTTYSNQP AVTIQVYEGERAMTK  
DNNLLGTFDLTGIPPAPRGV PKIDVTFDMDANGILNVS AKENSSGRTKNI  
VIKNDKGRLSQA EIDRMLADAERYRDEDDKQRQRVAARNQLESYVFSVR  
QALDDAGDKLSDSKTAARKECEDALKWLDNNTLAEQDEYEHRLKEV  
QRVCSPIMSKMHGAGAAGMNP GPQGQGPTVEEVD

>PxsHsp21.6 | Px005794.1

MADSGLKRNIPKLGDFSVIDTEFSSIRERFDAEMRKMEEEEMSKFRSDLMN  
RESNNFFKSTTSSTTSSQHSDSRQLAEPANTHWDSLNSPLIQDEGDGKSLK  
LRFDVSQYTP EEIVVKTVDNKLLVHAKHEEKSDTKSVYREYNREFLLPKG  
TNPEAIKSSLSRDGVLTVEAPLPQLAITDRHIPIQKH

>PxsHsp20.1 | Px003977.1

MSLLPFLFDYEIERPRRLMDQHFGLALTPQDFLAMAAPAPQLSRDYR  
WRHMAAALRDVGSNKADKDKFQVNLDVQHFAPEEISVKTADGYIIVEG  
KHEEKQDDHGFVSRQFTRRYALPEGCQAETVESRLSSDGVLTIVAPRKVP  
DAVKGERAVPIAQTGPVRKEIKDQTNGAEK

>PxsHsp19.9 | Px003978.1

MSLLPYVLGYNYPRRLDQDFGLALTPDDLVPVVAAPMMSADYYRPWR  
QRAAAARDVGSTLKADKDKFQVTLDVQHFPDEIAVKTADGYVVGEGR  
HEEKKDEHGYICRQFSRRYALPEGCKPEAVEARLSSDGVLTIGAPRKCPD  
AIKGERAVPIAQTGPVRKEITDNTNEKSAQNGSK

>PxsHsp19.9 | Px003979.1

MSLLPYVLGYNCPRLDQDFGLALTPDDLTVVAAPMMSADYYRPGR  
QLAAAARDVGSAIKADKDKFQVNLDVQPFSPDEISVKTADGYVVGEGR  
HEEKKDEHGYLSRQFSRRYALPEGCKPEAVESRLSSDGVLTIVAPRTC  
PD  
IKGERAVPIAQTGPVRKEITDNTNEKASGDKKKK

>PxsHsp23.5 | Px003980.1

MGDFGRKTFLLAAAVTFLIISPRHIMAEETCAGKEKTDKAETAANTLYDQ  
DFGMALTPEDLLTTMLSPFSSPWMMRDYFRPWRLSAVNDLGSTIKTDKD  
KFQVNLDVQHFTPDEITVKTDDGFIIVEGKHEEKKDDHGMVARQFVRKY  
SLPRGTRPETVSSSISADGVLTVTAPLDPSAAVGLRVVPIEKTGPVRKVKK  
AEGDGVDGSCNGQTG

>PxsHsp27.5 | Px005412.2

MLSSRTLTLALGLAVAAAVPVDKSTIDVSDKPALRPITTIEADDGDEGT  
WFSFPLFGNFGSFGNLGSLFTPIWKLFPNFADLGPRINSDENKFDIIVNVKE  
YKKDELKVVKVGFLIIVQGVHEAKTDSDFDRQFFHTYTLPVNASGTDVT  
ADLFNNGFLVVSCPLNGKSDKDEEVNRDVEIKETGTAYELQDKTTVGSS  
QPEGTKAPVEVSTAGLVENEDDRKEPTTPSSERELAKDNIIPHGQTNEALP

>PxsHsp22.1 | Px010239.1

MALLPYLLDYDIRPRRTRDFFGLGGFDLEDLLDRPQLRPRRRLGHPALRS  
LSSLTLPDVGSTIKADKDKFQVNLDVQHFAPEEITVKTVDGCVVVEGKHE  
EKEDDHGYVSRSEKRRYTLPEDCNPEAVESRLSTDGVLTILAPKASTGKGE  
RAVPITHHTGPVRRKQVEDQEVEDQANGDAEEDVKTPQQKRRKR

>PxsHsp14.4 | Px014444.1

YYRPWRHLAAAARDLGSENIKADKDQFQVNLDVQHFSPEEISVKTADGFI  
VIEGKHEEKKDQHGFSRQFTRRYSLPEGCDPDAVESKLSSDGVLTVVAP  
RKPQAVQGERSVPIAHTGPVRKEVNANGDK

>PxsHsp19.7 | Px014445.1

MSLLPYFYDYDFQFPRRAFDQSFQGHGLAPELLMAASPLRHRLPYWPRLPA  
DVGSSIKTDKDSFQVNIDVQHFAPEEITVKTADGFIVVEGKHEERKDEHG  
FISRQFVRKFKLPEGCDLEAVQSKLSSDGVLSVVAPKKVEAVKGERSVPIS  
HTGPVRKEVKEDLTVEPKDEGKK

>PxsHsp21.6|Px015010.1

MADSGLKRNIPKLGDFSVIDTEFSSIRERFDAEMRKMEEEMSKFRSDLMN  
RESNNFFKSTTSSTTSSQHSDSRQLAEPANTHWDSLNSPLIQDEGDGKSLK  
LRFDVSQYTPEEIVVKTVDNKLLVHAKHEEKSDTKSVYREYNREFLLPKG  
TNPEAIKSSLSRDGVLTVEAPLPQLAITDRHIPIQKH

>PxsHsp13.0|Px013294.1

MAARPLRPRLPYWPRLPADVGSSIKTDKDSFQVNIDVQHFAPEEITVKT  
DGFIVVEGKHEERKDEHGFISRQFVRKFKLPEGCDLEAVQSKLSSDGVLSV  
GAPKKVEAVKGERRG

>PxsHsp21.9|Px011945.2

MSVLPYYDFDRMMQRMEREFNSPFHQLFPRDLRPMGDFLKPWDNVF  
RPWEDIMKPLDNAFSLALQDAGSSITADDEKFQVNVDVQHFAPEEVQ  
VKVKDREVMIEGRHEEKRDDHGYISRQFIRRYTLPEGCLPDTVVSRLSSDG  
VLTVTAPKVLPLPSAGERIIPITHHTGPVQKRIGQGATVHEVK

>PxsHsp19.2|Px012965.1

MSLIPYWARHLRNLACRDPVMRVLEDPFALTALSRDPFFRDPLKYMKQMSA  
LDHDSHSHGIDGVLSETEVKADGKKVEVHLDVQNFTPDQIQVKTVGNEIT



VEGKKEVKKEGGWSRSHFERRFLLPEGFPPERVECHLDKGRLVLVAFRAQ  
PVEERTVPIQDKTKDAEKS

*Nilaparvata lugens*

>NIHsp90|BPHOGS10016311-TA

MGLTLVYTSDPNRQPLGPVLQKHKFGVGNAYDKPRFTLHYKTDSPLMIQ  
ALLYFPETKPDMFDLSSDKSSQVALYSRRVLIQSKADSLLPKWLRFBVKGEK  
LRIVLTNKILRFLNDKSTQQPQEYADFYKDYNIFLKEGVITSQDQNEKKEV  
AKLLRYESSLKPAGETRHAERHEERLHQHDNVEAIQLLDNGGLVRRLKR  
RKPFELV

>NIHsp70|BPHOGS10001502-TA

MPVKTPAIGIDLGTITYSCVGVFQQGKVEIANDQGNRTTPSYVAFTDSERL  
IGDAAKNQVAMNPKNTIFDAKRLIGRRFDDPKITQDMKHWPFVFNDC  
GKPKLQVEFKGEVKKFSPEEISAMVLTKMKETAETYLGAAPVKDAVITVPA  
YFNDSQRQATKDAGAIAGLNVLRIINEPTAAALAYGLDKNLKGERNVLI  
FDLGGGTFDVSILTIDEGSLFEVRSTAGDTHLGEASIEIDALCEGVDFYTKV  
SRARFEELCADLFRSTLHPVEKALNDAKMDKSSIHDVVLVGGSTRIPKIQS  
LLQNFFNGKSLNLSINPDEAVAYGAAYQAAILSGDQSSQIQDVLLVDVTP  
LSLGIETAGGVMAKIERNCRIPCKQSQTTFSTYSDNQPAVTIQVFEGERAM  
TKDNNLLGTFDLTGIPPAPRGVPKIEVTFDLANGILNVSAKETGTGITKN  
IVIKNDKGRLSKADIDRMVNEAEQFKEEDEKQRQKVSARNQLENYIFSVK  
QALEEAGSKLSDGDK

>NIHsp70|BPHOGS10005135-TA

MPVKAPAIGIDLGTTYSCVGVFQQGKVEIANDQGNRTTPSYVAFTDSER  
LIGDAAKNQVAMNPKNITIFDAKRLIGRRFDDPKITQDMKHWPFNVFND  
CGKPKLQVEFKGEVKKFSPEEISAMVLTKMKETAETYLGA PVKDAVITVP  
AYFNDSQRQATKDAGAIAGLNVLRIINEPTAAALAYGLDKNLKGERNVL  
IFDLGGGTFDVSILSIDEGLFEVRSTAGDTHLGGEDFDNRLVDHLSEEFKR  
KYRKDVKSNPRALRRLRTAAERAKRTLSSSTEASIEIDALCEGVDFYTKVS  
RARFEELCADLFRSTLHPVEKALNDAKMDKSSIHDVVLVGGSTRIPKIQSL  
LQNFFNGKSLNLSINPDEAVAYGAAVQAAILSGDQSSQIQDVLLVDVTPL  
SLGIETAGGVMTKIIERNCRIPCKQSQTFTTYADNQPAVTIQVFEGERAMT  
KDNLLGTFDLTGIPPAPRGVPQIDVTFDVS AKENGTGITKNIVIKNDKG  
RLSKTDIDRMVNEAEQFKEEDEKQRQKVSARNQLENYIFSVKQALDEAG  
SKLSDGDKSAARQRCDECLQWLDNNTLAEKEEFEHKLKELQQLCSPIMA  
KIYSSQGGGDGRRSQT CGQQFNQGQSFNNNGPTIEEVD

>NIHsp70|BPHOGS10006669-TA

MPGGSPTIGIDLGTTYSCAGAFLMGEVRILVNDQGNKTTTPSYVAFTDHAR  
FIGEAAKNYVTRNPQNTVFD AKRLIGRRYDDPKITQGM RHWQFGVLND  
CGKPMIEVDFKGAKKRFYPEEISAMILAKMKEIAENNLGTAVNNAVITVP  
AYFNDSQRQATKDAGTIAGFNVLRIINEPTAAALAYGLDKHVKGERNVL  
IFDLGGGTFDVSILTIDECVFEVQSTAGNTYLGGEDFDYRLVDYLC EEFRR  
KHGMDLRTNRRAMARLKTA AERAKRSLSSSTEASIEIDSLIEGIDFFTRVSR  
TRFEELCADLFLSTLLPVERALECARMDKSEIHDVVLVGGSTRIPKIQSLLQ  
NFFNGKPLNVAINPDEAVAYGAAIYAAILTGDNGAFIKDILLVDVTPLSL

GIETGVDIMATVIERNTQIPCKRSRIFTTHEDNQPDVEIQIYEGERVLA KDN  
NLLGTFDLIGIPPAPRGVPQIKVTFDINADGILNVEAEDIGTGFSESIKNN  
KGRLSPAQINRMLAEAEQFKKEDEKLRQRVSIMNQMESYIFSTKQAVNE  
AGNKITEIEKIETLQCCDEYLQWLEGKPTAEKDELQLKFNELQIQCAVVL  
VKIHQDDPNGKFINIDHLKC

>NIHsp70|BPHOGS10007039-TA

MGKPQPAIGIDLGTTYSCVGVWQHKGKVEIIANDQGNRTTPSYVAFTDTE  
RLIGDAAKSQVAMNPKNTVFDKRLIGRKFD DPKIQDDMKHWPFAVVD  
HSGKPKIRVEYKGEQKTFAPEEISSMVLTKMKEISETYLGTKVKDAVITVP  
AYFNDSQRQATKDAGAIAGLNVLRIINEPTAAALAYGLDKNLKGEKNVL  
IFDLGGGTFDVSILAIDEGSLFQVKSTAGDTHLGGEDFDNRLVKHFADEF  
QRKNKKDLTSNVRALRRLRTACERAKRTLSSSTEASLEIDALHDGIDFYA  
KITRARFEEMCMDMFRSTLAPVERALTDKLDKGAIHDVVLVGGSTRIPK  
IQKMLQDFFCGKALNLSINPDEAVAYGA AVQAAILSGDTSSAIQDVLLVD  
VAPLSLGIETAGGVMTKLVERNSRIPCKQQQTFTTYS DNQSAVTIQVFEGE  
RAMTKDNNLLGTFNLTGIPPAPRGIPKIEVTFDLDANGILNVSAKDSSTG  
KSEKITIQN DKGRLSKEEIDRMLKEADKYKAEDDKLRERVAARNQLEGY  
AFSVKQAAEDAGAKLSEA EKKQVQDKCAAVLAWLETNTQAEKDEFED  
KLKELQKECTPIMTKIHQGAGGGAGANAKGPTVEEVD

>NIHsp70|BPHOGS10007752-TA

MPVKTPAIGIDLGTTYSCVGVFQQGKVEIIANDQGNRTTPSYVAFTDSERL  
IGDAAKNQVAMNPKNTIFDAKRLIGRRFDDPKITQDMKHWPFTVYSDC

GKPKIQVDFKGEVKKFSPEEISAMVLTKMKETAETYLGAPVRDAVITVPA  
YFNDSQRQATKDAGAIAGLNVLRINEPTAAALAYGLDKNLKGERNVLI  
FDLGGGTFDVSILTIDEGSLFEVRSTAGDTHLGGEDFDNRLVDHLSEEFKR  
KYRKDIKSNPRALRRLRTAAERAKRTLSSSTEASIEIDALCEGVDFYTKVSR  
ARFEELCADLFRSTLHPVEKALNDAKMDKSSIHVVVLVGGSTRIPKIQSL  
QNFFNGKSLNLSINPDEAVAYGAQAAVQAAILSGDQSSQIQDVLLVDVTPLS  
LGIETAGGVMAKIIERNCRIPCKQSQTSTYSNQP AVTIQVFEGEAMTK  
DNNLLGTFDLTGIPPAPRGVVKIEVTFDLDANGILNVSAKETGTGITKNIVI  
KNDKGRLSKADIDRMVNEAEQFKEEDEKQRQKVSARNQLENYIFSVKQ  
ALEEAGSKLSDGDKSAARQRCDECLQWLDNNTLAEKEEFEHKLKELQQ  
LCSPIMAKIYSSGAANGPTSCGQQFNQSQSFPRSGPTVEEVD

>NIHsp70|BPHOGS10010728-TA

MPVKTPAIGIDLGTITYSCVGVFQQGKVEIANDQGNRTTPSYVAFTDSERL  
IGDAAKNQVAMNPKNTIFDAKRLIGRRRLSKADIDRMVNEAEQFKEEDE  
KQRQKVSARNQLENYIFSVKQALEEAGSKLSDGDKSAARQRCDECLQWL  
DNNTLAEKEEFEHKLKELQQLCSPIMAKIYSSGAANGPTSCGQQFNQQQ  
SFPRSGPTVEEVD

>NIHsp70|BPHOGS10017149-TA

MPLAIGIDLGTITYSCVGVWQQGKVEVIANDQGNRVTPSYVAFTETERLIG  
DAAKNQVAMNPENTVFDKRLIGRRYDDPKIAEDLKHWPFKVISESGKP  
KIQVQYKGVDKTFTPEEISSMGKHPQHHTFIFKLISLFYSFIDQNNKVN MPL  
AIGIDLGTITYSCVGVWQQGKVEVIANDQGNRVTPSYVAFTETERLIGDAA

KNQVAMNPENTVFDKRLIGRRYDDPKIAEDLKHWPFKVISES GKPKIQ  
VQYKGVDKTFTPEEISSMVLTKMKATAEAFLGRKISDAVITVPAYFNDSQ  
RQATKDAGAIAGLNVLRINEPTAAALAYGLDKNLSGEKKVLIFDLGGGT  
FDVSILTIDEGSLFEVKATAGDTHLGGEDFDNRLVDHFSNEVKKKYGKDL  
RKNARALRRLRTAAERAKRTLSSSTEATLEIDALIDGVDYHTRISRARFEEL  
CSDLFKKTLAPVEKALQDAEMGKSDIDDVVLVGGSTRIPKVQSLLQNFFN  
GKTLNLSINPDEAVAYGA AVQAAILSGDRSSEIQDVLLVDVTPLSLGIETA  
GGVMSTIERNTRIPGKKSQTFTTYS DNQSAVTIQVFEGERAMTVDNNLL  
GTFDLTGIPPAPRGVPHIDVTFDL DANGILNVSAKENSTGKTRNIVIKNDK  
GRLSKEEIDRMVRDAEKYKAEDDRQRKRVAARNRLESYALSVKQALAEA  
GSRLTPADISLAGDKCEAALEWLENNPQATCDECDVRMSELQRVCSPI M  
TKLHRGRGDSNEGPTIEEAD

>NIHsp70|BPHOGS10021590-TA

MAAMSVIGIDFGNQSSYVAVARAGGIETIANDYSLRATPSCVAFSDKSRIL  
GVAACKNQITNLDNTISGFKRL LGRKYNDPAVQAELRELSFKTVQQKNG  
GIGIKANFQGETHVFSPEQITAMFFTKLKDTSEIALKTKVNDCVISVSSVIL  
HGRRTQSTVGRGIHSRAERAATDERDDGHRTLVRHLQRGLAAARGEAA  
QRDLRRLRLTXXXXXXXXXXGASPPRRVSAGAFHKGK LKMLACASDPNF  
GGRDIDLILAEFNKNFQQKF KVDARSNPRAFLRLMNEVEKFKKQMSAN  
STKLSLFIDCFVDDKDVSGDMKRADMETLCSHLLQRVEKTLKQCLDDSN  
SWRLDAYSGDQAADHERVREDANTTLNQDEAVARGCALQCAMLSPAV  
RVREFNVTDIQTYPIKL VWDAAMGENGEME VFSLHHAVPFSKMLTFYRK

EPFSIKAYYSGQIPYDPYIGEFVVKEVKPTSTGESAKVKVKVRVNVNGVL  
TVTSARREAPAEAGDQQEEAAGQPDAPMDASPKQDAPAPASVPDNEN  
NTEEEQEKKEEKKSGKKITITELPIESFTNGLSVVEINNLLEMECKMIASDK  
QEKERVDTRNALEEYIYELRGQLNEEPVSDPNGRLSLCQFVKEADHQSLI  
KQLDGLETWLYEDGDECTRQIYAEKLSSLKNIGEPIKMRQQEREQRPIAF  
NEFVASIQQALGVTEQFRAGSKLYNHLVEADVAKVEQSVNTARKWVED  
KLAESKNCPLIENPAVTVAQIRQERLNFELEVSPILKKAKRKPAPAASEAP  
NENGQQPTSGSGQADQPAAGDQKQQTEQNSAEKMDVE

>NIHsp70|BPHOGS10023721-TA

MPVKTPAIGIDLGTITYSCVGVFQQGKVEIANDQGNRTTPSYVAFTDSERL  
IGDAAKNQVAMNPKNTIFDAKRLIGRRFDDPKITQDMKHWPFSVFND  
GKPKLQVEFKGEVKKFSPEEISAMVLTKMKETAETYLGA  
PVKDAVITVPA  
YFNDSQRQATKDAGAIAGLNVLRIINEPTAAALAYGLDKNLKG  
ERNVLI  
FDLGGGTFDVSILTIDEGSLFEVRSTAGDTHLGGEDFDNRLVDHL  
SEEFKR  
KYRKDIKSNPRALRRLRTAAERAKRTLSSSTEASIEIDALCEGVDFYTKVSR  
ARFEELCADLFRSTLHPVEKALNDAKMDKSSIHDVVLVGGSTRIPKIQSL  
LNFFNGKSLNLSINPDEAVAYGA  
AVQAAILSGDQSSQIQDVLLVDVTPLS  
LGIETAGGVMAKIIERNCRIPCKQSQT  
FSTYS  
DNQPAVTIQVFEG  
ERAMTK  
DNNLLGTFDLTGIPPAPRGV  
PKIEVTFDLDANGILNVSAKETGTGITKNIVI  
KNDKGRLSKADIDRMVNEAEQFKEE  
DEKQKHKVSARNQLENYIFSVKQ  
ALEEAGSKLSGDGKSAARQRCDECLQWLDNNTLAEKEEF  
EHKLKELQQ  
LCSPIMAKIYSSGAANGPTSCGQQFNQGGQSFPRSGPTVEEVD

>NlsHsp15.9|BPHOGS10024450-TA

MDKLFSRITGEKPLSDVPSYNLYQKDKENLELTVAVPGYKQHELDISVLN  
NKLTI SGKSESEKEEESNDSKTEKWLHKGIEKKGFSMSFDLDHRIRIQNAN  
LADGLLT LTFNYEIP EEQKPQKIAIGQTSQPEVIEHKK

>NlsHsp16|BPHOGS10024467-TA

MDKLFSRITGEKPLSDVPSYNLYQKDKENLELTVAVPGYKQHELDISVLN  
NKLTI SEKSESEKEEESNDSKTEKWLHKGIEKKGFSMSFDLDHRIRIQNAN  
LADGLLT LTFNYEIP EEQKPQKIAIGQTSQPEVIEHKK

>NlCpn60|BPHOGS10000283-TA

MFRLPLALRSTAIRQLKRNYAKDVRFGPEVRGLMLQGVDILADAVAVTM  
GPKGRNVILEQSWGSPKITKDGVTVAKGVELKDKFQNIGARLVQDVAN  
NTNEEAGDGTTTATV LARAI AKEGFDKISKGANPIEIRRGVMLAVDAIKE  
HLKTL SKPVTTP EEIAQVATISANGDKAIGELISAAMKKVGKEGVITVKDG  
KTLEDELEVIEGMKFDRGYISPYFINTAKGAKVEFQDALLLLSEKKISSIQAI  
IPALELANSQRKPLVIIAEDVDGEALSTLVVNRLKIGLQVA AVKAPGFGD  
NRKNTLQDMAIATGGIVFGDEGANL KLEDITPTDLGQVGEVVITKDDTL  
LLKGKGKKSDIDRRAELLRDQIADTTSEYEREKLQERLARLASGVAVLKV  
GGSSEVEVNEKKDRVTDALNATRAAVEEGIVPGGGTALLRCAAKLKQV  
VTANADQATGIDIVQKALRMPCMTIAQNAGVDASVVVSKVAEGTGDM  
GYDALNNEYVNMIEKGIIDPTKVSNYKCYS LKNHQCICTN

>NlCpn60|BPHOGS10009278-TA

MYRLPLALRSTAIRHLNRNYAKDVRFGEVRGLMLQGVDILADAVAVT  
MGPKGRNVILEQSWGSPKITKDGVTVAKGVELKDKFQNIGAKLVQDVA  
NNTNEEAGDGTTTATVLARAIAGEGFDKISKGANPIEIRRGVMLAVDAIK  
EHLKALSKPVTTPEEIAQVATISANGDKAIGELISAAMKKVGKEGVITVKD  
GKTLEDELEVIEGMKFDRGYISPYFINTSKGAKVEFQDALVLLSEKKISSIQS  
IIPALELANSQRKPLVIIAEDVDGEALSTLVVNRLKIGLQVA AVKAPGFGD  
NRKSTLQDMAIATGGIVFGDEGANLKLEDLTPTDLGQVGEVLITKDDTLL  
LKGKGKKS DIDRRAEQLRDQIQETTSEYEREKLQERLARLASGVAVLKVG  
GSSEVEVNEKKDRVTDALNATRAAVEEGIVPGGGTALLRCAAILKQVITA  
NADQATGIDIVQKALRMPCMTIAQDAGGDASVIVSKVAEGTGDMGYDA  
LNNEYVNMIEKGIIDPTKVRPHSIKLNLM

>NlCpn60|BPHOGS10035223-TA

MFRLPLALRSTAIRQLKRNYAKDVRFGEVRGLMLQGVDILADAVAVTM  
GPKGRNVILEQSWGSPKITKDGVTVAKGVELKDKFQNIGARLVQDVAN  
NTNEEAGDGTTTATVLARAIAGEGFDKISKGANPIEIRRGVMLAVDAIKE  
HLKTLSPVTTPEEIAQVATISANGDKAIGELISAAMKKVGKEGVITVKDG  
KTLEDELEVIEGMKFDRGYISPYFINTAKGAKVEFQDALLLLSEKKISSIQAI  
IPALELANSQRKPLVIIAEDVDGEALSTLVVNRLKIGLQVA AVKAPGFGD  
NRKNTLQDMAIATGGIVFGDEGANLKLEDITPTDLGQVGEVVITKDDTL  
LLKGKGKKS DIDRRAELLRDQIADTTSEYEREKLQERLARLASGVAVLKV  
GGSSEVEVNEKKDRVTDALNATRAAVEEGIVPGGGTALLRCAAKLKQV  
VTANADQATGIDIVQKALRMPCMTIAQNAGVDASVVVSKVAEGTGDM



GYDALNNEYVNMIEKGIIDPTKVSNYKCYLLKIYPCICTN

>NlCpn10|BPHOGS10034737-TA

LITTSNLLLTLTTHLCRRRCLSDSCRPLSAPIETGGCLFSRVSPSSLSFSLSLSP  
SLSLLIALFLPRLRAKRRTMVSAIRSIRNLTPLLDRVLVQRVKAQTKTAGGI  
ILPEASMEKLNEAKVLAVGPGALDKDGKRIPMSVTTGDHVLIPQYGGAP  
VKAGDEEYQLFRDSESRIPREAKKATRSGYVCTIRQEPVGDEACGQSPRW  
LKEEGRNRGLCMRACCVGNGLTGRWPKDTGLASRGTC

>NlCpn10|BPHOGS10035224-TA

MAFAKQAIKKLVPMFDRVLVLRADAVTKTTGGILPEKSQGKVLHGTVIA  
VGPGARNNNGELVPTQIKVGDQVLLPEYGGTKVELEENKEYHLFRES  
DILAKLEV

*Tribolium castaneum*

>TcHsp90|TC011024-PA

MANLGRIALQRVFLSGRRHLTCAPIVFLRPIRKKTGAASFVRCTSTSPNAS  
KASDEEHHSIIKDTEQPKGEPTKHEFQAETRMLLDIVARSLYSDKEV  
FVRELISNASDALEKFRYLTVSDREGLRDPNRVLEIHISTDKQARTLT  
IQDTGIGMSKEELIANLGVIARSGSKAFIEQLKSKELTS  
DSSNNIIGQFGVGFYSVFMVADRVDVYTRSSMEDQGYKWSSDGTGSYQIQDAEGVQCGTKIVLHLKTDCR  
EFCDETTVENVINKYSNFIGSPIYLNKGKANIVQPVWLSEPKSVTVQQHN  
EFYRFISGSYDVPRYILHYKTDVPLSIHALLYFPEGKPGLFEMSREVESGVA  
LYTRKVLINKNKT  
DNILPKWLR  
FVKGVVDSE  
DIPLNLSRELLQNSALIS  
RSLA

EASPYYESLKSKEVLFCYEPYDELVLMLQLQQFKGFKLVSVKEDMRDD  
KAANDLSNLGEDSLKRSEVNELSEWIKSKLSGKAVDVNATTRLENHPCV  
VTVEEMAAARHFIRTQSHQLSEDRRYAILQPKFEINPRHPHPIKKLHKLMTS  
DPHLAELLANQLFANSMBGAGLVEDPRVLLTSINALLTKALEKH

>TcHsp90|TC014606-PA

MPEENQNGDVETFAFQAEIAQLMSLIINTFYSNKEIFLRELISNSSDALDKI  
RYESLTNPSRLDSGKELYIKIIPNKNDGTLTIIDTGIGMTKADLVNNLGTIA  
KSGTKAFMEALQAGADISMIGQFGVGFYSAYLVADKVTVVSKNNDDEQ  
YVWESSAGGSFTVTQDRGEPLGRGTKIVLHMKEDQTEFLEEKKIKEIVKK  
HSQFIGYPIKL VVEKEREKELSDDEAEEEEKKEEGEDKDKDKPKIEDVGED  
EDEDTKKEDKKKKKTIKEKYTEDEELNKTPIWTRNADDISQEEYGEFYK  
SLTNDWEDHLAVKHFSVEGQLEFRALLFVPRRVPFDLFENKKRKNNIKL  
YVRRVFIMDNCEELIPEYLNFIKGVVDSEDLPLNISREMLQQNKILKVIRK  
NLVKKCLELFEELAEDKDGKGFYEQFSKNIKLGIHEDSQNRAKLSELLRY  
HTSASGDEACSLKDYVSRIKPNQKHIIYITGESKEQVANSSFVERVKKRGF  
EVVYMTEPIDEYVVQQMKEFDGKTLVSVTKEGLELPEDEEEKKKREEDKA  
KFEGLCCKVMKSILDNKVEKVVSNNRLVESPCCIVTSQYGWTANMERIMK  
AQALRDTSTMGYMAAKKHLEINPDHSIENLRQKAEADKNDKAVKDLV  
ILLFETALLSSGFTLDEPQVHASRIYRMIKLGLGIDEEEAAMITEDAQGGDAP  
SADAAESEDASRMEEVD

>TcHsp90|TC012185-PA

MKQLIVLAINLLLLIGYTRADESIGEGTVEKVVDLDLGASREGSRTDDEVVK

REEEAIKLDGLNVAQLKELRDKA EKFTFQTEVNRMMKLIINSLYRNKEIFL  
RELISNASDALDKIRLLSLTDKNVLDSNP ELNIRIKADKEAGMLHITDTGI  
GMTKQDLVNNLGTIAKSGTAEFLSKMQDASTAQDMNDMIGQFGVGFYS  
AFLVADKVVVTTKHND DKQYIWESDSSSFIVDDPRGDSLKR GTTVSLQL  
KPEAKDFLEHDTVRS LVKKYSQFINFPIYMWTSHTEQVEEPIEDEKSEEK  
EKPDTEDEAAVEEEKEEEKPKTKKVDKTVWDWELLNDSKPIWTKKPSEV  
DDKEYDEFYKSLTKDSKQPLAKVHFIAEGEVTFKALLYVPEVQPSESNRY  
GTKTDNIKLYVRRVFITDEFNDMIPSYLSFVRGVVDSDDLPLNVSRET LQQ  
HKLIKVIKKKLVRKVLDMLKKISEEDYEKFWKEYSTNIKLG TIEDPANRTR  
LAKLLQFHSSNSDKMTSLADYVKRMKPKQERIFYIAGSSKDEVQKSPFVE  
RLLRKGYEVLVYLVEAVDEY AISAIPEFEGKKFQNVAKEGFSLTESEGGKEQ  
LEQLKTTFEPLTKWLSDEALKDHVAKATVSERLSDSPCALVASMFGWTG  
NMERLAISNAHQKSDDPQRSYYLNQKKTLEINPRHPLMRELLKRVNDDP  
SDPTAKDMALMLFRTATLRSGYMLRETADFAQSIEAMMRKTLGVPLDEG  
VEEEEDLPEDGIPEEESEEIKDDDGDHDEL

>TcHsp70|TC002822-PA

MATGLVSLPIGIDL GTTYSCVGVFSNGTVNIIANDQGNRTTPSFVAFTDVE  
RLVGDPAGKQVALNPENTVYDAKRLIGRKFN DPAVQHDMKLWPFQVI  
NDNGKPKIRVRYKGETKTFFPEEISSMVLGKMKETA EAYLGTHVTGAVIT  
VPAYFNDSQRQATKDAGTIAGLNVLRIINEPTAAAIAYGLDKKGSTERNI  
LIFDFGGGTFDVSILNLADGIFEVKSTAGDTHLGGEDIDCRMVDFFTEEFK  
RKHKIDLKNNKRALRRLQTACERAKRTLSSATQASVEIDSLANGVDFYT

NISRAKFEELNGDIFRRTLEPVEKALRDAKIDKSKIDDIVLVGGSTRIPKIQS  
LLQSLFQGKELNKSINPDEAVAYGAADVQAAILSGDNSEAVRDILLDDVTP  
LSLGIETAGGVMAVLIQRNTTIPVKHSQIFSTFADNQPGVSIQVYEGERSM  
TRDNNLLGKFELMGIPPAPRGVPQIEVSFDIDANGILNVSAVENATGKTN  
QITIRNDKGRLTKEQIEKMVTEAEKFKEQDQQMKATVASKNDLEAYVYQ  
MKNLADDPTVASKLSPADKTLLSNTCKEAVEWMGKNQSATEEQNVRK  
KEEIENKLKPIIMKLYAGPGQSSQRQFPSHDNNNRGNGPIIDEVD

>TcHsp70|TC007793-PA

MRLIFAILSTLLALATVCESLAVMSVDLGSEWMKIGIVSPGVPMEIALNKE  
SKRKSPAVISFRDNVRSFGEEAQTIGTRFPKNAYMYLLDLLGKSINHPLVK  
LYKERFPYYEIVEDPERNTILFKHDDNVFYSPPELIAQLLGKAKEFAEQGA  
RQPIKECVLTVPGYFNQIERKSLQAANLAGLKVQLINDYTAVALNYGI  
FRSKDFNETAQYVMFYDMGATSTTATLVSYQTVKTKDKGFVETHPQLSVI  
GVGFDRTLGGLEIQLRLRDHLARKFNEMKKTKNDVFANARSMKLFKE  
AGRVKNILSANAETHYAQIEGLLDEEDFKVLVTRDELEQLAGDLFERVGRP  
VELALQSAHLTKDIIGQVVLVGAGTRVPKVQEKLGQVVGQDLAKNLNT  
DEAATMGAVYKAADLSTGFQVKKFLTRDAVLYPIQVVFERETPEGVKQV  
KRTLFSLMNPYPQKKIITFNKYNDDFNFEVNYADLDYLPPNEIANVGQV  
NLTEVSLVGVAEALKKNSGENVETKGIKAHFSMDESGILNLVNVELVVE  
KTVSETDEEGTFSKLGNTISKLFGGEEKTETGEEPVKNDTEPQKNNTTVPKP  
EIKPKVITVKEPITTKQKPLTITPLSKKQFDDSLEKLSKLDKVEKELNRRAT  
ALNNLESFVIEVQNKLDEDDFVASASQDEVETIRKSCSEVSDWLYEDGSD

ADADTYEKKLDGLKTLTSDLFKRVWEHNERPEALNALNTMLNQSSQFLT  
VAKNLTKSTNPERDVFTDGEVEALEKIIKETEEWKS KMIEEQNKLKKEYES  
VKLTVKSITEKMG AIDREVKYLVNKHRLWRP KKVEKKEESKQEETVEAP  
GNTTTESAPEDIKPTSEKDTHTEL

>TcHsp70|TC007965-PA

MSETVIGIDLGTNSCVCVHLNNKLKILENKEGGRTTPSYVFFTEHSFIVG  
QYAKRMADAKPEYGIYEIKRLVGRKYDDPYVKKNLNYLPFKVTNISNEP  
VVVVQTKNQVLKKSPQELCAYILGKIKSDVEAKLGHPVDKAVITVPAYF  
NIAQREVTLAAAQTAGFSVLKLLNEPTAAALSYYYENKSNVDGYSLVYD  
LGGGTFDVAILQRSGSDITIVGVDGETHLGGHDFDNLLVEHVCQVLINQ  
HNYNPKNDRRNMRRLNNECEEVKKILSEAEETNIILNAFVPNQNTVDIPI  
TRAQFEAKAEQLFQKTIEIVTRCLEKVSLEKSDIKEVILSGGSTRIPIQSLIS  
AYFGGKILNKFNPDECVAEGAAIQAALLSKDPAQAISQIKITDVTPLSLGI  
ADFVDVMTFMIKRNTPIPVTRTTNRVTVYNNQANMSFHIYEGERLDAKK  
NYFLGRLEITDLTPAPPGQCSVTVVM TVDQNGILTVKATETVSNRTKDLK  
IVYTRGSRSDSDIKSVVVEAEENKKEDELFKQFAEVKGYVVKYCIRAMYN  
FENKGLVATHKDAYDKCNDVLNRLKDLDVDDEKEVKKLKVEVLALCQ  
PLQKKYAFKHMP

>TcHsp70|TC007971-PA

MAAMSVIGIDLGNE SCYVAVAKAGGIETIANDYSLRATPSFIAFSDKNRIL  
GVAACKNQITNMKNTVYGLKRLIGRKYRDPHVQRELQMLPFNVIEVAQ  
GNIGIKVNYLNEEHIFSPEQCLAMLLTKLKDISSTALQTPINDCVISVPSYFT

NNERKALMDSAAIAGLNVLRLFNETTATALSYGIYKQDLPGPDDKSRNV  
VFVDCGHSSLQVFACAFNKDKLRMIATASDPYLGGRDFDLALADHFCKE  
FQTKYHIDAKSNARAFSRLLEGEVEKVKKQMSANSTSLPLNIECFMDDKD  
VHSSIKRTDMEQLCAPLFQRVETTLKQCLDASGLKLDEIYSVEIVGGSSRIP  
AIKQLIEKVFKKVPSTTLNQDEAVSRGCALQCAMLSPAVRVREFGVKDV  
QNYAVSVSWDASTDGEAAGEVEAFPVNHQVPYSKMLTFYRQEPFSIKAM  
YSGNVPYPDKNIGTWIVKDIRPNAEGKPQKVVKVRINLHGIMTVSSASL  
FEAKESSEAENEETQKVQQQEEQEKPTNQNSTDQQNDVDAPMADGVN  
NAAPEDGDKDKKKKQVLKSIELPIESLTAGFSQVEINQYTEQEFKMIAAD  
RQEKERADARNAFEEYVYELRGKISSDDELGAFILENDRSALMQQLDDM  
ENWLYEDGAECNRQVYQDKLAELKSKGEPIQTRKVEFELRPHVIEDFAKS  
LQLTMKALEAIKGNDPKFAHLTEDEVKKVDNAFKNSFQWLEQTRAKLV  
NAPKHAVAPPVTVSQIRQEKNDFECTVSPILNKPPPKAPSPPKEEKSPTDEK  
AQNAQTEQNQQNQQNQQNQQENMDWSSAN

>TcHsp70|TC009445-PA

MQAKTDLVIGIDLGTNSSAAYYFKEKVRVVENKEGDRITPSCVYFRDQN  
TVIVGKYARKMAEQSNQSEVFGIKRFIGKQFDDPDLRNDLRHVPFTIESIE  
NKPIVTINHKSGVCKKTPEEVSALVLQKVKTDESGLGERVKNKAVITVPA  
YFNVSQREATLEAAQKAGFTVLKLLNEPTAAAFICYVDQNWGEESYSLV  
YDLGGGTFDVAILKNCRQNIDIVGVDGDTHLGGHDFDNLIIDYVCDILLK  
EYDYNPKDDRRNMRRLSICEEAKQTLSDLEETIIILPAFTKKHDIININTR  
EQFESMAQMLFQRTIDIVDKCLTTCNIAKTEIKEVILSGGSTRIPEIQNLLSS

YFGGKELCKFTHPGECVAEGAAIQAAILSTNPDQKINTIQIKDVISLSLGID  
VHFNLMMFFIIKRNRSIPIKKTSLITIFNQQSAMSINIYEGERTDVRKNRHLG  
TLKITNLTPAPPGQCEVHVIMSVDQNGILTFRAKEKFRNNEKDLKLLYTR  
GGRSDSEVKSILQKVEDQAEEDERFEKFAMKKTVLFNYCETVIYNLESKN  
LSSSYKEVYDLCKDTQNKLESLELGSEDQVNPLVEAAKSKCDSLVRQYNF  
DYMFDL

>TcHsp70|TC009126-PA

MVKSPAVGIDLGTTYSCVGVWQHKGVEIANDQGNRTTPSYVAFTDTER  
LLGDAAKNQVAMNPSNTIFDAKRLIGRKFDDEPKIQQDIKHWPFKVINDC  
GKPKIQVEHKGEVKKFAPEEISSMVLTKMKETA EAYLGTSVRDAVITVPA  
YFNDSQRQATKDAGVIAGLNMRIINEPTAAALAYGLDKNLKGERNVLI  
FDLGGGTFDVSILTIDEGSLFEVRATAGDTHLGGEDFDNRLVNHLADEFK  
RKYKKDLRSNPRALRRLRTAAERAKRTLSSSTEASIEIDALFDGIDFYTKVS  
RARFEELNADLFRGTLQPVEKALTDAMDKGMIHDIVLVGGSTRIPKIQQ  
LLQNYFNGKSLNLSINPDEAVAYGA AVQA AVLSGETDSKIQDVLLVDVT  
PLSLGIETAGGVMTKIIERNARIPCKQTQTFTTYADNQPAVTIQVFEGERA  
MTKDNLLGTFDLTGIPPAPRGV PKIEVTFDL DANGILNVSAKDTSSGNS  
RNITIKNDKGRLSQKDIDRMVSEAEQYKEEDEKQRQRIAARNHLEGYIFQ  
LKQAVSDCGDKLSSADKETITRECD SCLQWLDANTLAEKEEYEDRQKQL  
TQICSPIMAKLYQQGAPQGGQMPGSCGQQAGGFGGQRQGGPTIEEVD

>TcHsp70|TC009706-PA

MVKSPAVGIDLGTTYSCVGVWQHKGVEIANDQGNRTTPSYVAFTDTER

LLGDAAKNQVAMNPSNTIFDAKRLIGRKFDDEPKIQQDIKHWPFKVINDC  
GKPKIQVEHKGEVKKFAPEEISSMVLTKMKETA EAYLGTSVRDAVITVPA  
YFNDSQRQATKDAGVIAGLNVMRIINEPTAAALAYGLDKNLKGERNVLI  
FDLGGGTFDVSILTIDEGSLFEVRATAGDTHLGGEDFDNRLVNHLADEFK  
RKYKKDLRSNPRLRLRTAAERAKRTLSSSTEASIEIDALFDGIDFYTKVS  
RARFEELNADLFRGTLQPVEKALTDAMDKGMIHDIVLVGGSTRIPKIQQ  
LLQNYFNGKSLNLSINPDEAVAYGA AVQA AVLSGETDSKIQDVLLVDVT  
PLSLGIETAGGVMTKIIERNARIPCKQTQTFTTYADNQPAVTIQVFEGERA  
MTKDNLLGTFDLTGIPPAPRGV PKIEVTFDL DANGILNVSAKDTSSGNS  
RNITIKNDKGRLSQKDIDRMVSEAEQYKEEDEKQRQRIAARNHLEGYIFQ  
LKQAVSDCGDKLSSADKETITRECD SCLQWLDANTLAEKEEYEDRQKQL  
TQICSPIMAKLYQQGAPQGGQMPGSCGQQAGGF GGQRQGGPTIEEVD

>TcHsp70|TC010172-PA

MVKSPA VGIDLGTTYSCVGVWQH GKVEIIANDQGNRTTPSYVAFTDTER  
LLGDAAKNQVAMNPSNTIFDAKRLIGRKFDDEPKIQQDIKHWPFKVINDC  
GKPKIQVEHKGEIKKFAPEEISSMVLTKMKETA EAYLGTSVRDAVITVPAY  
FNDSQRQATKDAGVIAGLNVMRIINEPTAAALAYGLDKNLKGERNVLIF  
DLGGGTFDVSILTIDEGSLFEVKATAGDTHLGGEDFDNRLVNHLADEFKR  
KYKKDLRSNPRLRLRTAAERAKRTLSSSTEASIEIDALFDGIDFYTKISR  
ARFEEMNADLFRGTLQPVEKALTDAMDKGMIHDIVLVGGSTRIPKIQQ  
LLQNYFNGKPLNLSINPDEAVAYGA AVQA AVLSGETDSKIQDVLLVDVT  
PLSLGIETAGGVMTKIIERNARIPCKQTQTFTTYADNQPAVTIQVFEGERA



MTKDNLLGTFDLTGIPPAPRGVPKIEVTFDL DANGILNVSAKDTSSGNS  
RNITIKNDKGRLSQKDIDRMVAEAEQYKEEDEKQRQRIAARNQLEGYIFQ  
LKQTISEQGSKLSEADKETVTRECDSC LQWLDANTLAEKEEYEDKQKQLS  
SICAPIMAKLYQQGGQGGMPGAGGSCGQQAGGF GGQRQGGPTIEEVD  
>TcHsp70|TC004425-PA

MYSYLHVALATLTTERKKSKEMKLHLALGALCLVLSVWAKDDKKEKED  
VGTVIGIDLGT TYSCVGVYKNGRVEI IANDQGNRITPSYVAFTADGERLIG  
DAAKNQLTTNPENTIFDAKRLIGRDWSEQSVQNDIKFFPFKVIEKNSKPHI  
AVETSQGNKVFAPEEISAMVLGKMKETA EAYLGKKVTHAVVTVPAYFN  
DAQRQATKDAGTIAGLVVMRIINEPTAAAIAYGLDKKDGEKNVLVFDLG  
GGTFDVSLLTIDNGVFEVVATNGDTHLGGEDFDQRVMDHFIKLYKKKKG  
KDIRKDNRAVQKLRREVEKAKRALSSAHQVRIEIESFFEGDDFSETLTRAK  
FEELNMDLFRSTMKPVQKVLEDADMNKKDVDEIVLVGGSTRIPKVQQLV  
KEFFGGKEPSRGINPDEAVAYGA AVQAGVLSGEQD TDAIVLLDVNPLTM  
GIETVGGVMTKLIPRNTVIPTKKSQVFSTASDNQHTVTIQVYEGERPMTK  
DNHLLGKFDLTGIPPAPRGVPQIEVTFEIDANGILQVSAEDKGTGNREKIV  
ITNDQNRLTPEDIDRTS

>TcHsp70|TC000487-PA

MLAAARVLSRKAVECSKFSDVVGKRNFSYLTNNTSSYTLHPKYDIQTRF  
KSEGVKGAVIGIDLGT TNSCVAVMEGKQAKVIENSEGSRTTPSVVAFTKD  
GERLVGMPAKRQAVTNSANTFYATKRLIGRRFDDSEVKKDMNNVSYKIV  
KASNGDAWVQGS DGKMYSQIGAFILTKMKETA EAYLNTKVKNVITV

PAYFNDSQRQATKDAGQIAGLNVLRVINEPTAAALAYGMDKTEDKIIAV  
YDLGGGTFDISILEIQKGVFEVKSTNGDTFLGGEDFDNVLVNHLVSEFKKE  
QGIDVTKDPMAMQRLKEAAEKAKIELSSSMQTDINLPYLTMDASGPKH  
MNLKLSRSKFESLVGELVKRTVQPCQKALKDAEVAKNEIGEVLVGGMT  
RMPKVQSTVQDIFGKQPSRAVNPDEAVAVGAAVQGGVLAGDVTDVLLL  
DVTPLSLGIETLGGVFTRLISRNTTIPTKKSQVFSTAADGQTQVEIKVHQGE  
REMAADNKLLGQFSLVGIPPAPRGVPQIEVTFDIDANGIVHVSARDKGTG  
KEQQIVIQSSGGLSKEEENMVRRAEEYAKEDKIKKERVEAINQAEGIVHD  
TETKMEEYKDQLPKEECDKLKEEIAKVREMLAKKDEADPEEIRKVTGTLQ  
QSSLKLFEMAYKKMAADREGSGGSSSGSSEQQSEEPKEKKEDKN

>TcHsp70|TC000188-PA

MGKVPGIGIDLGTITYSCVGVWQHKGKVEIANDQGNRTTPSYVAFTDTERL  
IGDAAKSQVAMNPKNTVFDKRLIGRKFDDTKIQEDMKHWPFTVINDG  
GKPKIQVEYKGEIKKFAPEEISSMVLTKMKEIADTYLGAKVNDVITVPAY  
FNDSQRQATKDAGAIAGLNVLRINEPTAAALAYGLDKNLKGEKNVLIF  
DLGGGTFDVSILSIDEGLFEVKSTAGDTHLGGEDFDNRLVNHFIQEFKRK  
HHKDLSSNTRAVRRLRTACERAKRTLSSSAEASIEIDALHEGIDFYSKVSR  
ARFEEMCMDYFRSTLQPVERALADAKLDKGAIHDIVLVGGSTRIPKIQKM  
LQDFFCGKPLNLSINPDEAVAYGAAVQAAILTGDTSSQIQDVLLVDVAPL  
SLGIETAGGVMTKIVERNSRIPCKQQQTFTTYSNQNNAVTIQVFEGERAM  
TKDNNLLGTFNLTGIPPAPRGVPKIEVTFDLDANGILNVSAKDTSTGKSER  
ITITNDKGRLSKADIDKMLAEAEKYKAEDDKQKERIAARNQLEGYIFSVK

QAGEDAPADKLTEDDKKIIREKCSAALSWLDSNQLAEKEEFEDKCLKELQ  
KDCSPIMMKLHQGAQGGAAPGAKGPTVEEVD

>TcHsp70|TC005884-PA

MSELVVGIDLGTTNSCIAVERNGKIEVIPNREGNRTTLSYVYYGEDSILVG  
KTAKYMASANPSNGIYEIKRLIGCLHDDPDIESERKSLNYELVRGTNGEILI  
QVEQNSEKFHTLP EEVCARILHRLKIDAEMYLGQKVSKAVVTVPAYFNN  
NQRAATRDAARIAGFEVLKLVNEPSAAALAYVRENRIKNGRVILIYDLGG  
GTFDVSIVRTENGTIKVLSDGDTHLGGQDFLNRLVDHVVDYVQTKHGI  
KVRENRKRLMMNILNSCEKTKKILTSANRTVIPLEFSGHFDQLEVTREQFEE  
LNRDLFAKTVKILDNCIRNRRMSKEEIDEVLLVGGSSRIPRIETLLKAYFDK  
PIQRNINADEAIAIGAALAEAHHFAQTHHNSLLIDVLPLSIGTVFDEETIFFN  
FARNTPLPANSKHVHVFKNRKQKNCILSVYEGGHLDCNKNVLLGAHEI  
KWTATTKKNRNVEITMQINNYGIIWVTARGESIKTFSIALNKGRLLEDDEIR  
KLSRGLQVS

>TcsHsp21.8|TC010105-PA

MSVVP LLFRDWWDDDDFHFSRPSRLLDQQFGLGLRRDDLNTFSSMPRS  
SLFRNYVRPWRSTAIQRQDSGSTIQQDKDKFQVILDVQQFAPNEITVKTS  
NSIIVEGKHEEKQDEHGFISRHFVRRYLLPQDHDINDVVSSLSSDGILTVSA  
PKKSLQQPAGERVVPITQTGPAKATVTPVAESQPKVEQPN

>TcsHsp23.6|TC001152-PA

MSEGIRRDIPKLGDFSVIDTEFSSIRERFDAEMRKMEEEEMSKFRSELMNRE  
SNNFFRSTTRS YEYETVSGGNKSKSSSTTTQSSHNSGLDVAQRPSEVRTWY

DDLNSPLIQQDGNDKCLKLRFDVSQYAPEEIVVKTVDNKLLVHAKHEEK  
TESKSVYREYNREFLLPKGTNPEQIKSSLSKDGVLTV EAPLPAITAGETLIPI  
QH

>TcsHsp22.2|TC003541-PA

MALLSFVTDPLDYFRPSLLLDQQFGMGLDDDDFLQPCLPRKVRRMMLTS  
PYARPWRSQASKKDKGSTLSVDKDKFQVSLDVQQFTPEEITVKASDDTITI  
EGKHEEKEDEHGFISRHFIRKYKLPEGHDISQVTSKLSTDGVLTTAPKSEE  
KIKERNIPISFTGQPSQIEATPTIEVGADDKKPEEKKEARKRK

>TcsHsp18.3|TC005338-PA

MALWLYTDPDFDYRPAHRFLERWFDPEDLFPRDFRLLQDHGSSDINFDK  
DKFQANIDVQQFRPEEITVKVSDDTVTVEGKHEEKRDEHGYISRHFVRKY  
VLPKGHDVNRVESKLSSDGVLTTAPKVG DGKEQEKSIPVVQTGQPTPAV  
QQKQEEKK

>TcsHsp20.8|TC006793-PA

MSLLLFSDPFEYSRPSRILDQHFGLGLDPEDLLSPLIPREMRHLMRCPAGY  
LRPW RSAASQRDTGSTVTFDKDKFQANLDVQQFKPEEISVKVNDNTITIE  
GKHEEKEDEHGFISRHFVRRYVLPKDCDVSKVESRLSTDGVLSITAPKICA  
SKETERSIPVVQTGQPSKA VENKEEKKKEK

## Supplementary Tables

**Table 1. Gene-specific primers for q-RT-PCR used in this study.**

| Gene name            | Forward primer (5'-3')        | Reverse primer (5'-3')      |
|----------------------|-------------------------------|-----------------------------|
| <i>BtaHsp70-1</i>    | GTCTATGAAGGTGAGCGAGCA<br>ATGA | CGTTGAGGATACCGTTGGCATC<br>A |
| <i>BtaHsp70-2</i>    | GGAGACCAGAGTGCGGAAAT          | AGCGTTCCTCTCGACGATCT        |
| <i>BtaHsp70-3</i>    | TGAAGGTGAGCGTGCAGTAG          | CGTGACATCAACTGAAGGTAC<br>AA |
| <i>BtaHsc70-1</i>    | ACAGCAAGCCTCACATCGAA          | GGTTGAAACTACAGGTTTGCC<br>A  |
| <i>BtaHsc70-2</i>    | CCCTCTGTCGTAGCATTCTCTA        | TTCTTCACTTCAGCATCGTCAA      |
| <i>BtaHsp70-4</i>    | TGTGGTCACTGTGCCCCGCTTA        | CGTTCCGCCTCCGAGATCGTAA      |
| <i>BtaHsp70-5</i>    | AGTCGGTGGTCAAACACGCAT<br>G    | TCGCCACCTAATACGCCTCCTT      |
| <i>BtaHsp70-6</i>    | ACTGAACGGAAAGATCAATG<br>CAG   | GGTTTCCGACTAAGGCCATCA       |
| <i>BtaHsp105/110</i> | GCGAGTGGTTGGATGAAGAA<br>GG    | CAATGCCTCTGGTGTGGTCTCA      |
| <i>BtaHsp70-7</i>    | GGATCTTTAAGGCGGAAGATG<br>G    | TGAACGCAAGTTGGATGGCT        |
| <i>BtaHsp67B2</i>    | TCCGTCCCAATGAGTGCTTGT         | GCTTGAGTGACTTCGCCTAAGG      |

|                   |                                                       |                                                        |
|-------------------|-------------------------------------------------------|--------------------------------------------------------|
| <i>BtaHsp60</i>   | ACAGGCAACAAGAGCAGCAG<br>TA                            | TGGCACGAAGAGCAACACGA<br>AT                             |
| <i>BtaHsp90A1</i> | CGCTCTCCTCGCCAGAATTGT                                 | CCAACACCGAACTGACCGATG<br>A                             |
| <i>BtaHsp90A2</i> | CCTCTTGCCACGCTACCTGAA<br>C                            | CTTGGCGAGCCTCACTCTGTTG                                 |
| <i>BtaHsp90A3</i> | ATTGGAATGACCAAGGCTGAC<br>C                            | AGCGACGAGGAAGGCTGAG                                    |
| <i>BtaHsp90A4</i> | AGCTCATGGTGCACCTTTAGG                                 | GACATCAACTGGGCGATTTC                                   |
| <i>BtaHsp100</i>  | AGCCGACGGTAGAAGACACC<br>AT                            | TGCCGCCGCTTCATCAATCAA                                  |
| <i>BtaHsp23.8</i> | TGTGTTGCAGCTCGACCAA                                   | TGACGTCGAACCTCAGCTTG                                   |
| <i>BtaHsp40-1</i> | GGTCGTTCTTCGGCGGACATT                                 | TGGTGGAATTGCTGAGCGTGAT                                 |
| <i>BtaHsp40-2</i> | AAGCGAAGTGAACCAGGAAC<br>CA                            | GCGACCGACTACCATCCTAAC<br>G                             |
| <i>BtaHsp40-3</i> | CGCCCTGAAATACCACCCTGA<br>C                            | TCCTCCTCCACCTCCGACATTG                                 |
| <i>BtaHsp40-4</i> | CGAAGGAATGCCTCAGTACA<br>AGAA                          | TTATCCGCTGCTATCGAATCTG<br>G                            |
| <i>dsgfp</i>      | TAATACGACTCACTATAGGGA<br>GAC<br>CACTGACCCTGAAGTTCATCT | TAATACGACTCACTATAGGGA<br>GAC<br>CACGTCTTGTAGTTGCCGTCGT |

|                    |                        |                        |
|--------------------|------------------------|------------------------|
|                    | GC                     | C                      |
| <i>dsBtaHsp90A</i> | TAATACGACTCACTATAGGGT  | TAATACGACTCACTATAGGGA  |
| 3                  | GGACAACCTGCGAAGACCTCAT | GACCAGGTTCTTACCGTCGTAG |
|                    | C                      | T                      |

---
